# Supplementary material for: HIF1A-mediated pathways promote euploid cell survival in chromosomally mosaic embryos
Source: eLife. 2025 Oct 14;13:RP101912. doi: 10.7554/eLife.101912 (PMC12520657; doi:10.7554/eLife.101912)
Supplement: Figure 1—figure supplement 1—source data 1. [file elife-101912-fig1-figsupp1-data1.xlsx]

## Sheet: Sheet1
number CEN for dividing cell: 40
Treatment	Position	Diploid	MN - crest	MN +2	MN -2	Non dividing	Total		Treatment	Position	Diploid	MN - crest	MN +2	MN -2	Non dividing	Total	%DIPLOID CELLS	ANEUPLOID
DMSO	1	8	0	0	0	0	8		DMSO	1	100	0	0	0	0	100	87.5	12.5
	2	8	0	0	0	0	8			2	100	0	0	0	0	100
	3	8	0	0	0	0	8			3	100	0	0	0	0	100	MN - crest	0
	4	7	0	0	1	0	8			4	87.5	0	0	12.5	0	100	MN +2	0
	5	7	0	0	1	0	8			5	87.5	0	0	12.5	0	100	MN -2	8.59375
	18	8	0	0	0	0	8			18	100	0	0	0	0	100	Non dividing	0
	7	8	0	0	0	0	8			7	100	0	0	0	0	100
	8	7	0	0	1	0	8			8	87.5	0	0	12.5	0	100
	9	7	0	0	1	0	8			9	87.5	0	0	12.5	0	100
	10	7	0	0	1	0	8			10	87.5	0	0	12.5	0	100
	17	8	0	0	0	0	8			17	100	0	0	0	0	100
	12	7	0	0	1	0	8			12	87.5	0	0	12.5	0	100
	13	8	0	0	0	0	8			13	100	0	0	0	0	100
	14	6	0	0	2	0	8			14	75	0	0	25	0	100
	15	6	0	0	2	0	8			15	75	0	0	25	0	100
	16	7	0	0	1	0	8	128		16	87.5	0	0	12.5	0	100
AZ3146	1	4	0	0	3	1	8		AZ3146	1	50	0	0	37.5	12.5	100	37.5	62.5
	2	4	0	1	2	1	8			2	50	0	12.5	25	12.5	100
	3	1	0	1	5	1	8			3	12.5	0	12.5	62.5	12.5	100	MN - crest	0
	4	4	0	0	4	0	8			4	50	0	0	50	0	100	MN +2	25
	5	2	0	3	2	1	8			5	25	0	37.5	25	12.5	100	MN -2	34.8684
	6	4	0	0	3	1	8			6	50	0	0	37.5	12.5	100	Non dividing	7.89474
	7	1	0	2	4	1	8			7	12.5	0	25	50	12.5	100
	8	3	0	2	1	2	8			8	37.5	0	25	12.5	25	100
	9	2	0	2	3	1	8			9	25	0	25	37.5	12.5	100
	10	4	0	2	2	0	8			10	50	0	25	25	0	100
	11	3	0	3	1	1	8			11	37.5	0	37.5	12.5	12.5	100
	12	2	0	2	4	0	8			12	25	0	25	50	0	100
	13	3	0	3	2	0	8			13	37.5	0	37.5	25	0	100
	14	4	0	2	2	0	8			14	50	0	25	25	0	100
	15	3	0	3	1	1	8			15	37.5	0	37.5	12.5	12.5	100
	16	0	0	4	4	0	8			16	0	0	50	50	0	100
	17	1	0	3	4	0	8			17	12.5	0	37.5	50	0	100
	18	2	0	2	4	0	8			18	25	0	25	50	0	100
	19	2	0	3	2	1	8	152		19	25	0	37.5	25	12.5	100
Reversine	1	3	0	1	1	3	8		Reversine	1	37.5	0	12.5	12.5	37.5	100	25	75
	2	2	0	1	1	4	8			2	25	0	12.5	12.5	50	100	MN - crest	9.72222
	3	3	2	0	3	0	8			3	37.5	25	0	37.5	0	100	MN +2	15.2778
	4	1	0	4	2	1	8			4	12.5	0	50	25	12.5	100	MN -2	31.9444
	5	3	1	0	2	2	8			5	37.5	12.5	0	25	25	100	Non dividing	19.4444
	6	1	0	2	5	0	8			6	12.5	0	25	62.5	0	100
	7	1	0	2	3	2	8			7	12.5	0	25	37.5	25	100
	8	1	4	0	3	0	8			8	12.5	50	0	37.5	0	100
	9	2	0	1	3	2	8	72		9	25	0	12.5	37.5	25	100
						14	12
				11
					41	91		11			8.59375
