# Supplementary material for: HIF1A-mediated pathways promote euploid cell survival in chromosomally mosaic embryos
Source: eLife. 2025 Oct 14;13:RP101912. doi: 10.7554/eLife.101912 (PMC12520657; doi:10.7554/eLife.101912)
Supplement: Figure 2—source data 1. [file elife-101912-fig2-data1.xls]

## Sheet: Blastocyst total
	Efficiency Target Gene			2
	Efficiency Reference Gene			2
	Sample	Target	Ct	delta Ct	delta Target		Sample	Reference	Ct	delta Ct	delta Reference		Sample	Ratio	log(ratio)
	DMSO 1.1	p53	30.1145	0.0154422	1.01076		DMSO 1.1	Ppia	26.5904	0.164923	1.12111		DMSO 1.1	0.901575	-0.0449982
	DMSO 1.2	p53	30.1145	0.0154422	1.01076		DMSO 1.2	Ppia	26.7964	-0.0410668	0.971936			1.03995
	DMSO 1.3	p53	30.2878	-0.15785	0.89636		DMSO 1.3	Ppia	26.7964	-0.0410668	0.971936			0.922242
	DMSO 2.1	p53	30.5943	-0.464384	0.724781		DMSO 2.1	Ppia	27.309	-0.553634	0.681302		DMSO 2.1	1.06382	0.0268671
	DMSO 2.2	p53	30.8404	-0.71047	0.611121		DMSO 2.2	Ppia	27.425	-0.669634	0.628666			0.972092
	DMSO 2.3	p53	30.839	-0.70907	0.611714		DMSO 2.3	Ppia	27.274	-0.518634	0.698032			0.876341
	REV 1.1	p53	29.461	0.66897	1.58994		REV 1.1	Ppia	26.4406	0.314776	1.24382		REV 1.1	1.27827	0.106623
	REV 1.2	p53	29.7594	0.370509	1.29281		REV 1.2	Ppia	26.4798	0.275521	1.21043			1.06806
	REV 1.3	p53	29.6734	0.456517	1.37222		REV 1.3	Ppia	26.4932	0.26216	1.19927			1.14421
	REV 2.1	p53	29.5553	0.574599	1.48926		REV 2.1	Ppia	26.4074	0.347962	1.27276		REV 2.1	1.1701	0.0682245
	REV 2.2	p53	29.6008	0.529103	1.44303		REV 2.2	Ppia	26.5605	0.194828	1.14459			1.26074
	REV 2.3	p53	29.4735	0.656433	1.57618		REV 2.3	Ppia	26.7445	0.0108341	1.00754			1.56439
	AZ 1.1	p53	30.3697	-0.239809	0.846858		AZ 1.1	Ppia	26.3718	0.383538	1.30454		AZ 1.1	0.649163	-0.187646
	AZ 1.2	p53	30.0835	0.04645	1.03272		AZ 1.2	Ppia	26.3366	0.418801	1.33682			0.772523
	AZ 1.3	p53	30.3337	-0.203724	0.868307		AZ 1.3	Ppia	26.4236	0.331719	1.25851			0.689947
	AZ 2.1	p53	30.6848	-0.554819	0.680743		AZ 2.1	Ppia	27.4129	-0.657564	0.633948		AZ 2.1	1.07381	0.0309293
	AZ 2.2	p53	30.8891	-0.759138	0.590849		AZ 2.2	Ppia	27.2987	-0.543338	0.686181			0.861069
	AZ 2.3	p53	30.5233	-0.393371	0.761348		AZ 2.3	Ppia	27.3428	-0.587389	0.665546			1.14394
		Avg Ct total	30.1299					Avg Ct total	26.7554
	Sample	Target	Ct	delta Ct	delta Target		Sample	Reference	Ct	delta Ct	delta Reference		Sample	Ratio	log(ratio)
	DMSO 1.1	Hif1a	28.2971	0.103561	1.07442		DMSO 1.1	Ppia	26.5904	0.164923	1.12111		DMSO 1.1	0.958359	-0.0184719
	DMSO 1.2	Hif1a	28.1534	0.247264	1.18695		DMSO 1.2	Ppia	26.7964	-0.0410668	0.971936			1.22123
	DMSO 1.3	Hif1a	28.1871	0.213508	1.1595		DMSO 1.3	Ppia	26.7964	-0.0410668	0.971936			1.19298
	DMSO 2.1	Hif1a	28.7923	-0.39166	0.762252		DMSO 2.1	Ppia	27.309	-0.553634	0.681302		DMSO 2.1	1.11882	0.0487593
	DMSO 2.2	Hif1a	28.94	-0.539361	0.688076		DMSO 2.2	Ppia	27.425	-0.669634	0.628666			1.0945
	DMSO 2.3	Hif1a	28.9021	-0.501477	0.706383		DMSO 2.3	Ppia	27.274	-0.518634	0.698032			1.01196
	REV 1.1	Hif1a	28.155	0.245649	1.18563		REV 1.1	Ppia	26.4406	0.314776	1.24382		REV 1.1	0.953215	-0.0208092
	REV 1.2	Hif1a	28.297	0.103649	1.07449		REV 1.2	Ppia	26.4798	0.275521	1.21043			0.88769
	REV 1.3	Hif1a	28.2	0.200649	1.14922		REV 1.3	Ppia	26.4932	0.26216	1.19927			0.95826
	REV 2.1	Hif1a	28.3269	0.0737202	1.05243		REV 2.1	Ppia	26.4074	0.347962	1.27276		REV 2.1	0.826885	-0.0825549
	REV 2.2	Hif1a	28.3984	0.00221368	1.00154		REV 2.2	Ppia	26.5605	0.194828	1.14459			0.875018
	REV 2.3	Hif1a	28.5704	-0.16972	0.889015		REV 2.3	Ppia	26.7445	0.0108341	1.00754			0.882364
	AZ 1.1	Hif1a	27.8277	0.572973	1.48759		AZ 1.1	Ppia	26.3718	0.383538	1.30454		AZ 1.1	1.14032	0.0570256
	AZ 1.2	Hif1a	27.9658	0.434827	1.35175		AZ 1.2	Ppia	26.3366	0.418801	1.33682			1.01117
	AZ 1.3	Hif1a	27.9826	0.418006	1.33608		AZ 1.3	Ppia	26.4236	0.331719	1.25851			1.06163
	AZ 2.1	Hif1a	29.0049	-0.604243	0.657816		AZ 2.1	Ppia	27.4129	-0.657564	0.633948		AZ 2.1	1.03765	0.0160512
	AZ 2.2	Hif1a	29.1856	-0.784991	0.580356		AZ 2.2	Ppia	27.2987	-0.543338	0.686181			0.845776
	AZ 2.3	Hif1a	29.1856	-0.784991	0.580356		AZ 2.3	Ppia	27.3428	-0.587389	0.665546			0.871999
		Avg Ct total	28.4006					Avg Ct total	26.7554

## Sheet: morula total
	Efficiency Target Gene			2											Efficiency Target Gene			2
	Efficiency Reference Gene			2											Efficiency Reference Gene			2
	Sample	Target	Ct	Avg Ct	delta Ct	delta Target		Sample	Reference	Ct	Avg Ct	delta Ct	delta Reference		Sample	Target	Ct	delta Ct	delta Target		Sample	Reference	Ct	delta Ct	delta Reference		Sample	Ratio	log(ratio)
	DMSO 1.1	p53	32.7323	33.1954	#REF!	#REF!		DMSO 1.1	Ppia	29.7926	29.9296	0.934208	1.91084		DMSO 1.1	p53	32.7323	0.78201	1.71952		DMSO 1.1	Ppia	29.7926	0.937823	1.91564		DMSO 1.1	0.897626	-0.0469045
	DMSO 1.2	p53	32.6243					DMSO 1.2	Ppia	30.0382					DMSO 1.2	p53	32.6243	0.889916	1.85307		DMSO 1.2	Ppia	30.0382	0.692214	1.61576			1.14687
	DMSO 1.3	p53	34.2296					DMSO 1.3	Ppia	29.9581					DMSO 1.3	p53	34.2296	-0.715343	0.60906		DMSO 1.3	Ppia	29.9581	0.77233	1.70803			0.356587
	DMSO 2.1	p53	33.9388	33.375	#REF!	#REF!		DMSO 2.1	Ppia	30.2003	30.2038	0.660024	1.58011		DMSO 2.1	p53	33.9388	-0.424518	0.745088		DMSO 2.1	Ppia	30.2003	0.530103	1.44403		DMSO 2.1	0.515977	-0.287369
	DMSO 2.2	p53	33.2422					DMSO 2.2	Ppia	29.959					DMSO 2.2	p53	33.2422	0.272095	1.20756		DMSO 2.2	Ppia	29.959	0.771413	1.70694			0.707441
	DMSO 2.3	p53	32.9442					DMSO 2.3	Ppia	30.4521					DMSO 2.3	p53	32.9442	0.570103	1.48463		DMSO 2.3	Ppia	30.4521	0.278302	1.21277			1.22417
	REV 1.1	p53	32.5389	32.1587	#REF!	#REF!		REV 1.1	Ppia	32.2499	32.1775	-1.31372	0.402281		REV 1.1	p53	32.5389	0.975388	1.96617		REV 1.1	Ppia	32.2499	-1.51947	0.348815		REV 1.1	5.63671	0.751026
	REV 1.2	p53	31.9567					REV 1.2	Ppia	32.0999					REV 1.2	p53	31.9567	1.55755	2.94354		REV 1.2	Ppia	32.0999	-1.36948	0.387031			7.60543
	REV 1.3	p53	31.9804					REV 1.3	Ppia	32.1829					REV 1.3	p53	31.9804	1.53387	2.89561		REV 1.3	Ppia	32.1829	-1.45248	0.365392			7.92468
	REV 2.1	p53	34.4057	33.572	#REF!	#REF!		REV 2.1	Ppia	31.6542	32.1559	-1.29204	0.408372		REV 2.1	p53	34.4057	-0.891483	0.53906		REV 2.1	Ppia	31.6542	-0.923749	0.527137		REV 2.1	1.02262	0.00971312
	REV 2.2	p53	33.1551					REV 2.2	Ppia	32.5845					REV 2.2	p53	33.1551	0.359208	1.28272		REV 2.2	Ppia	32.5845	-1.8541	0.276605			4.63738
	REV 2.3	p53	33.1551					REV 2.3	Ppia	32.2289					REV 2.3	p53	33.1551	0.359208	1.28272		REV 2.3	Ppia	32.2289	-1.49854	0.353912			3.62441
	AZ 1.1	p53	32.6016	32.6664	#REF!	#REF!		AZ 1.1	Ppia	30.4956	30.7203	0.143494	1.10458		AZ 1.1	p53	32.6016	0.912617	1.88246		AZ 1.1	Ppia	30.4956	0.234801	1.17674		AZ 1.1	1.59972	0.204043
	AZ 1.2	p53	32.7813					AZ 1.2	Ppia	30.7201					AZ 1.2	p53	32.7813	0.732922	1.662		AZ 1.2	Ppia	30.7201	0.010293	1.00716			1.65019
	AZ 1.3	p53	32.6163					AZ 1.3	Ppia	30.9453					AZ 1.3	p53	32.6163	0.898011	1.86349		AZ 1.3	Ppia	30.9453	-0.214868	0.861625			2.16277
	AZ 2.1	p53	34.8683	34.36	#REF!	#REF!		AZ 2.1	Ppia	29.9899	29.9958	0.868043	1.82519		AZ 2.1	p53	34.8683	-1.35401	0.391202		AZ 2.1	Ppia	29.9899	0.740487	1.67074		AZ 2.1	0.234149	-0.630508
	AZ 2.2	p53	33.7262					AZ 2.2	Ppia	30.0079					AZ 2.2	p53	33.7262	-0.211917	0.863389		AZ 2.2	Ppia	30.0079	0.722501	1.65004			0.523253
	AZ 2.3	p53	34.4855					AZ 2.3	Ppia	29.9895					AZ 2.3	p53	34.4855	-0.971221	0.510074		AZ 2.3	Ppia	29.9895	0.740886	1.6712			0.305214
			Avg Ct total	33.2212						Avg Ct total	30.8638					Avg Ct total	33.5143					Avg Ct total	30.7304
	Sample	Target	Ct	Avg Ct	delta Ct	delta Target		Sample	Reference	Ct	Avg Ct	delta Ct	delta Reference		Sample	Target	Ct	delta Ct	delta Target		Sample	Reference	Ct	delta Ct	delta Reference		Sample	Ratio	log(ratio)
	DMSO 1.1	Hif1a	31.8383	32.0276	1.17133	2.25219		DMSO 1.1	Ppia	29.7926	29.9296	0.934208	1.91084		DMSO 1.1	Hif1a	31.8383	1.68107	3.20665		DMSO 1.1	Ppia	29.7926	0.937823	1.91564		DMSO 1.1	1.67393	0.223739
	DMSO 1.2	Hif1a	32.3152					DMSO 1.2	Ppia	30.0382					DMSO 1.2	Hif1a	32.3152	1.20417	2.30404		DMSO 1.2	Ppia	30.0382	0.692214	1.61576			1.42598
	DMSO 1.3	Hif1a	31.9292					DMSO 1.3	Ppia	29.9581					DMSO 1.3	Hif1a	31.9292	1.59012	3.01074		DMSO 1.3	Ppia	29.9581	0.77233	1.70803			1.7627
	DMSO 2.1	Hif1a	32.6542	32.6551	0.543825	1.45783		DMSO 2.1	Ppia	30.2003	30.2038	0.660024	1.58011		DMSO 2.1	Hif1a	32.6542	0.865152	1.82153		DMSO 2.1	Ppia	30.2003	0.530103	1.44403		DMSO 2.1	1.26142	0.10086
	DMSO 2.2	Hif1a	32.4724					DMSO 2.2	Ppia	29.959					DMSO 2.2	Hif1a	32.4724	1.04691	2.0661		DMSO 2.2	Ppia	29.959	0.771413	1.70694			1.21041
	DMSO 2.3	Hif1a	32.8386					DMSO 2.3	Ppia	30.4521					DMSO 2.3	Hif1a	32.8386	0.680773	1.603		DMSO 2.3	Ppia	30.4521	0.278302	1.21277			1.32177
	REV 1.1	Hif1a	39.4413	36.5819	-3.38306	0.0958509		REV 1.1	Ppia	32.2499	32.1775	-1.31372	0.402281		REV 1.1	Hif1a	39.4413	-5.92192	0.0164939		REV 1.1	Ppia	32.2499	-1.51947	0.348815		REV 1.1	0.0472855	-1.32527
	REV 1.2	Hif1a	35.12					REV 1.2	Ppia	32.0999					REV 1.2	Hif1a	35.12	-1.60071	0.329714		REV 1.2	Ppia	32.0999	-1.36948	0.387031			0.851906
	REV 1.3	Hif1a	35.1845					REV 1.3	Ppia	32.1829					REV 1.3	Hif1a	35.1845	-1.6652	0.315301		REV 1.3	Ppia	32.1829	-1.45248	0.365392			0.862912
	REV 2.1	Hif1a	34.1053	34.1292	-0.930365	0.524726		REV 2.1	Ppia	31.6542	32.1559	-1.29204	0.408372		REV 2.1	Hif1a	34.1053	-0.585917	0.666226		REV 2.1	Ppia	31.6542	-0.923749	0.527137		REV 2.1	1.26386	0.101698
	REV 2.2	Hif1a	34.191					REV 2.2	Ppia	32.5845					REV 2.2	Hif1a	34.191	-0.671629	0.627797		REV 2.2	Ppia	32.5845	-1.8541	0.276605			2.26966
	REV 2.3	Hif1a	34.0915					REV 2.3	Ppia	32.2289					REV 2.3	Hif1a	34.0915	-0.572191	0.672594		REV 2.3	Ppia	32.2289	-1.49854	0.353912			1.90046
	AZ 1.1	Hif1a	31.8602	32.2895	0.909341	1.87819		AZ 1.1	Ppia	30.4956	30.7203	0.143494	1.10458		AZ 1.1	Hif1a	31.8602	1.65913	3.15827		AZ 1.1	Ppia	30.4956	0.234801	1.17674		AZ 1.1	2.6839	0.428767
	AZ 1.2	Hif1a	31.7669					AZ 1.2	Ppia	30.7201					AZ 1.2	Hif1a	31.7669	1.75243	3.36925		AZ 1.2	Ppia	30.7201	0.010293	1.00716			3.3453
	AZ 1.3	Hif1a	33.2415					AZ 1.3	Ppia	30.9453					AZ 1.3	Hif1a	33.2415	0.277819	1.21236		AZ 1.3	Ppia	30.9453	-0.214868	0.861625			1.40706
	AZ 2.1	Hif1a	31.2168	31.51	1.68893	3.22418		AZ 2.1	Ppia	29.9899	29.9958	0.868043	1.82519		AZ 2.1	Hif1a	31.2168	2.30249	4.93307		AZ 2.1	Ppia	29.9899	0.740487	1.67074		AZ 2.1	2.95263	0.470209
	AZ 2.2	Hif1a	31.5509					AZ 2.2	Ppia	30.0079					AZ 2.2	Hif1a	31.5509	1.96845	3.91349		AZ 2.2	Ppia	30.0079	0.722501	1.65004			2.37175
	AZ 2.3	Hif1a	31.7621					AZ 2.3	Ppia	29.9895					AZ 2.3	Hif1a	31.7621	1.75721	3.38045		AZ 2.3	Ppia	29.9895	0.740886	1.6712			2.02276
			Avg Ct total	33.1989						Avg Ct total	30.8638					Avg Ct total	33.5193					Avg Ct total	30.7304
