# Supplementary material for: HIF1A-mediated pathways promote euploid cell survival in chromosomally mosaic embryos
Source: eLife. 2025 Oct 14;13:RP101912. doi: 10.7554/eLife.101912 (PMC12520657; doi:10.7554/eLife.101912)
Supplement: Figure 3—source data 1. [file elife-101912-fig3-data1.xls]

## Sheet: Scatter Plot 1D
Scatter Plot 1D
Intensity Sum Ch=2 Img=1	Unit	Channel	Image	ID	Surpass Object	Surpass Object Data ID	Original ID	Original Component Name	Original Component ID	Original Image Name	Original Image ID
3660000		2	Image 1	26	AZ DAPI.icsx_[ibrx_2023-09-20T10-16-47.402]	700001	26	AZ DAPI.icsx_[ibrx_2023-09-20T10-16-47.402]	700001	61223 PLA PARP1 HIF1A _aa_Normo Rev Position011 Image 27_[ims1_2023-09-20T10-16-47.402].ims	/Users/mzglab_user/Desktop/esv/pla hif1a parp1 2023/imaris/normoxia/reversine/61223 PLA PARP1 HIF1A _aa_Normo Rev Position011 Image 27_[ims1_2023-09-20T10-16-47.402].ims
2220000		2	Image 1	36	AZ DAPI.icsx_[ibrx_2023-09-20T10-16-47.402]	700001	36	AZ DAPI.icsx_[ibrx_2023-09-20T10-16-47.402]	700001	61223 PLA PARP1 HIF1A _aa_Normo Rev Position011 Image 27_[ims1_2023-09-20T10-16-47.402].ims	/Users/mzglab_user/Desktop/esv/pla hif1a parp1 2023/imaris/normoxia/reversine/61223 PLA PARP1 HIF1A _aa_Normo Rev Position011 Image 27_[ims1_2023-09-20T10-16-47.402].ims
3710000		2	Image 1	38	AZ DAPI.icsx_[ibrx_2023-09-20T10-16-47.402]	700001	38	AZ DAPI.icsx_[ibrx_2023-09-20T10-16-47.402]	700001	61223 PLA PARP1 HIF1A _aa_Normo Rev Position011 Image 27_[ims1_2023-09-20T10-16-47.402].ims	/Users/mzglab_user/Desktop/esv/pla hif1a parp1 2023/imaris/normoxia/reversine/61223 PLA PARP1 HIF1A _aa_Normo Rev Position011 Image 27_[ims1_2023-09-20T10-16-47.402].ims
2470000		2	Image 1	47	AZ DAPI.icsx_[ibrx_2023-09-20T10-16-47.402]	700001	47	AZ DAPI.icsx_[ibrx_2023-09-20T10-16-47.402]	700001	61223 PLA PARP1 HIF1A _aa_Normo Rev Position011 Image 27_[ims1_2023-09-20T10-16-47.402].ims	/Users/mzglab_user/Desktop/esv/pla hif1a parp1 2023/imaris/normoxia/reversine/61223 PLA PARP1 HIF1A _aa_Normo Rev Position011 Image 27_[ims1_2023-09-20T10-16-47.402].ims
1160000		2	Image 1	50	AZ DAPI.icsx_[ibrx_2023-09-20T10-16-47.402]	700001	50	AZ DAPI.icsx_[ibrx_2023-09-20T10-16-47.402]	700001	61223 PLA PARP1 HIF1A _aa_Normo Rev Position011 Image 27_[ims1_2023-09-20T10-16-47.402].ims	/Users/mzglab_user/Desktop/esv/pla hif1a parp1 2023/imaris/normoxia/reversine/61223 PLA PARP1 HIF1A _aa_Normo Rev Position011 Image 27_[ims1_2023-09-20T10-16-47.402].ims
3760000		2	Image 1	60	AZ DAPI.icsx_[ibrx_2023-09-20T10-16-47.402]	700001	60	AZ DAPI.icsx_[ibrx_2023-09-20T10-16-47.402]	700001	61223 PLA PARP1 HIF1A _aa_Normo Rev Position011 Image 27_[ims1_2023-09-20T10-16-47.402].ims	/Users/mzglab_user/Desktop/esv/pla hif1a parp1 2023/imaris/normoxia/reversine/61223 PLA PARP1 HIF1A _aa_Normo Rev Position011 Image 27_[ims1_2023-09-20T10-16-47.402].ims
658000		2	Image 1	79	AZ DAPI.icsx_[ibrx_2023-09-20T10-16-47.402]	700001	79	AZ DAPI.icsx_[ibrx_2023-09-20T10-16-47.402]	700001	61223 PLA PARP1 HIF1A _aa_Normo Rev Position011 Image 27_[ims1_2023-09-20T10-16-47.402].ims	/Users/mzglab_user/Desktop/esv/pla hif1a parp1 2023/imaris/normoxia/reversine/61223 PLA PARP1 HIF1A _aa_Normo Rev Position011 Image 27_[ims1_2023-09-20T10-16-47.402].ims
1650000		2	Image 1	94	AZ DAPI.icsx_[ibrx_2023-09-20T10-16-47.402]	700001	94	AZ DAPI.icsx_[ibrx_2023-09-20T10-16-47.402]	700001	61223 PLA PARP1 HIF1A _aa_Normo Rev Position011 Image 27_[ims1_2023-09-20T10-16-47.402].ims	/Users/mzglab_user/Desktop/esv/pla hif1a parp1 2023/imaris/normoxia/reversine/61223 PLA PARP1 HIF1A _aa_Normo Rev Position011 Image 27_[ims1_2023-09-20T10-16-47.402].ims
3040000		2	Image 1	95	AZ DAPI.icsx_[ibrx_2023-09-20T10-16-47.402]	700001	7	AZ DAPI.icsx_[ibrx_2023-09-20T10-16-47.402]	700001	61223 PLA PARP1 HIF1A _ab_Normo Rev Position012 Image 28_[ims1_2023-09-20T10-16-47.402].ims	/Users/mzglab_user/Desktop/esv/pla hif1a parp1 2023/imaris/normoxia/reversine/61223 PLA PARP1 HIF1A _ab_Normo Rev Position012 Image 28_[ims1_2023-09-20T10-16-47.402].ims
2250000		2	Image 1	96	AZ DAPI.icsx_[ibrx_2023-09-20T10-16-47.402]	700001	9	AZ DAPI.icsx_[ibrx_2023-09-20T10-16-47.402]	700001	61223 PLA PARP1 HIF1A _ab_Normo Rev Position012 Image 28_[ims1_2023-09-20T10-16-47.402].ims	/Users/mzglab_user/Desktop/esv/pla hif1a parp1 2023/imaris/normoxia/reversine/61223 PLA PARP1 HIF1A _ab_Normo Rev Position012 Image 28_[ims1_2023-09-20T10-16-47.402].ims
3890000		2	Image 1	97	AZ DAPI.icsx_[ibrx_2023-09-20T10-16-47.402]	700001	11	AZ DAPI.icsx_[ibrx_2023-09-20T10-16-47.402]	700001	61223 PLA PARP1 HIF1A _ab_Normo Rev Position012 Image 28_[ims1_2023-09-20T10-16-47.402].ims	/Users/mzglab_user/Desktop/esv/pla hif1a parp1 2023/imaris/normoxia/reversine/61223 PLA PARP1 HIF1A _ab_Normo Rev Position012 Image 28_[ims1_2023-09-20T10-16-47.402].ims
2090000		2	Image 1	98	AZ DAPI.icsx_[ibrx_2023-09-20T10-16-47.402]	700001	16	AZ DAPI.icsx_[ibrx_2023-09-20T10-16-47.402]	700001	61223 PLA PARP1 HIF1A _ab_Normo Rev Position012 Image 28_[ims1_2023-09-20T10-16-47.402].ims	/Users/mzglab_user/Desktop/esv/pla hif1a parp1 2023/imaris/normoxia/reversine/61223 PLA PARP1 HIF1A _ab_Normo Rev Position012 Image 28_[ims1_2023-09-20T10-16-47.402].ims
1330000		2	Image 1	99	AZ DAPI.icsx_[ibrx_2023-09-20T10-16-47.402]	700001	17	AZ DAPI.icsx_[ibrx_2023-09-20T10-16-47.402]	700001	61223 PLA PARP1 HIF1A _ab_Normo Rev Position012 Image 28_[ims1_2023-09-20T10-16-47.402].ims	/Users/mzglab_user/Desktop/esv/pla hif1a parp1 2023/imaris/normoxia/reversine/61223 PLA PARP1 HIF1A _ab_Normo Rev Position012 Image 28_[ims1_2023-09-20T10-16-47.402].ims
1250000		2	Image 1	100	AZ DAPI.icsx_[ibrx_2023-09-20T10-16-47.402]	700001	19	AZ DAPI.icsx_[ibrx_2023-09-20T10-16-47.402]	700001	61223 PLA PARP1 HIF1A _ab_Normo Rev Position012 Image 28_[ims1_2023-09-20T10-16-47.402].ims	/Users/mzglab_user/Desktop/esv/pla hif1a parp1 2023/imaris/normoxia/reversine/61223 PLA PARP1 HIF1A _ab_Normo Rev Position012 Image 28_[ims1_2023-09-20T10-16-47.402].ims
2960000		2	Image 1	101	AZ DAPI.icsx_[ibrx_2023-09-20T10-16-47.402]	700001	25	AZ DAPI.icsx_[ibrx_2023-09-20T10-16-47.402]	700001	61223 PLA PARP1 HIF1A _ab_Normo Rev Position012 Image 28_[ims1_2023-09-20T10-16-47.402].ims	/Users/mzglab_user/Desktop/esv/pla hif1a parp1 2023/imaris/normoxia/reversine/61223 PLA PARP1 HIF1A _ab_Normo Rev Position012 Image 28_[ims1_2023-09-20T10-16-47.402].ims
1240000		2	Image 1	102	AZ DAPI.icsx_[ibrx_2023-09-20T10-16-47.402]	700001	29	AZ DAPI.icsx_[ibrx_2023-09-20T10-16-47.402]	700001	61223 PLA PARP1 HIF1A _ab_Normo Rev Position012 Image 28_[ims1_2023-09-20T10-16-47.402].ims	/Users/mzglab_user/Desktop/esv/pla hif1a parp1 2023/imaris/normoxia/reversine/61223 PLA PARP1 HIF1A _ab_Normo Rev Position012 Image 28_[ims1_2023-09-20T10-16-47.402].ims
2360000		2	Image 1	103	AZ DAPI.icsx_[ibrx_2023-09-20T10-16-47.402]	700001	2	AZ DAPI.icsx_[ibrx_2023-09-20T10-16-47.402]	700001	61223 PLA PARP1 HIF1A _ac_Normo Rev Position013 Image 29_[ims1_2023-09-20T10-16-47.402].ims	/Users/mzglab_user/Desktop/esv/pla hif1a parp1 2023/imaris/normoxia/reversine/61223 PLA PARP1 HIF1A _ac_Normo Rev Position013 Image 29_[ims1_2023-09-20T10-16-47.402].ims
1950000		2	Image 1	104	AZ DAPI.icsx_[ibrx_2023-09-20T10-16-47.402]	700001	3	AZ DAPI.icsx_[ibrx_2023-09-20T10-16-47.402]	700001	61223 PLA PARP1 HIF1A _ac_Normo Rev Position013 Image 29_[ims1_2023-09-20T10-16-47.402].ims	/Users/mzglab_user/Desktop/esv/pla hif1a parp1 2023/imaris/normoxia/reversine/61223 PLA PARP1 HIF1A _ac_Normo Rev Position013 Image 29_[ims1_2023-09-20T10-16-47.402].ims
1620000		2	Image 1	105	AZ DAPI.icsx_[ibrx_2023-09-20T10-16-47.402]	700001	4	AZ DAPI.icsx_[ibrx_2023-09-20T10-16-47.402]	700001	61223 PLA PARP1 HIF1A _ac_Normo Rev Position013 Image 29_[ims1_2023-09-20T10-16-47.402].ims	/Users/mzglab_user/Desktop/esv/pla hif1a parp1 2023/imaris/normoxia/reversine/61223 PLA PARP1 HIF1A _ac_Normo Rev Position013 Image 29_[ims1_2023-09-20T10-16-47.402].ims
1620000		2	Image 1	106	AZ DAPI.icsx_[ibrx_2023-09-20T10-16-47.402]	700001	7	AZ DAPI.icsx_[ibrx_2023-09-20T10-16-47.402]	700001	61223 PLA PARP1 HIF1A _ac_Normo Rev Position013 Image 29_[ims1_2023-09-20T10-16-47.402].ims	/Users/mzglab_user/Desktop/esv/pla hif1a parp1 2023/imaris/normoxia/reversine/61223 PLA PARP1 HIF1A _ac_Normo Rev Position013 Image 29_[ims1_2023-09-20T10-16-47.402].ims
1360000		2	Image 1	107	AZ DAPI.icsx_[ibrx_2023-09-20T10-16-47.402]	700001	8	AZ DAPI.icsx_[ibrx_2023-09-20T10-16-47.402]	700001	61223 PLA PARP1 HIF1A _ac_Normo Rev Position013 Image 29_[ims1_2023-09-20T10-16-47.402].ims	/Users/mzglab_user/Desktop/esv/pla hif1a parp1 2023/imaris/normoxia/reversine/61223 PLA PARP1 HIF1A _ac_Normo Rev Position013 Image 29_[ims1_2023-09-20T10-16-47.402].ims
1900000		2	Image 1	108	AZ DAPI.icsx_[ibrx_2023-09-20T10-16-47.402]	700001	9	AZ DAPI.icsx_[ibrx_2023-09-20T10-16-47.402]	700001	61223 PLA PARP1 HIF1A _ac_Normo Rev Position013 Image 29_[ims1_2023-09-20T10-16-47.402].ims	/Users/mzglab_user/Desktop/esv/pla hif1a parp1 2023/imaris/normoxia/reversine/61223 PLA PARP1 HIF1A _ac_Normo Rev Position013 Image 29_[ims1_2023-09-20T10-16-47.402].ims
1570000		2	Image 1	109	AZ DAPI.icsx_[ibrx_2023-09-20T10-16-47.402]	700001	10	AZ DAPI.icsx_[ibrx_2023-09-20T10-16-47.402]	700001	61223 PLA PARP1 HIF1A _ac_Normo Rev Position013 Image 29_[ims1_2023-09-20T10-16-47.402].ims	/Users/mzglab_user/Desktop/esv/pla hif1a parp1 2023/imaris/normoxia/reversine/61223 PLA PARP1 HIF1A _ac_Normo Rev Position013 Image 29_[ims1_2023-09-20T10-16-47.402].ims
1130000		2	Image 1	110	AZ DAPI.icsx_[ibrx_2023-09-20T10-16-47.402]	700001	11	AZ DAPI.icsx_[ibrx_2023-09-20T10-16-47.402]	700001	61223 PLA PARP1 HIF1A _ac_Normo Rev Position013 Image 29_[ims1_2023-09-20T10-16-47.402].ims	/Users/mzglab_user/Desktop/esv/pla hif1a parp1 2023/imaris/normoxia/reversine/61223 PLA PARP1 HIF1A _ac_Normo Rev Position013 Image 29_[ims1_2023-09-20T10-16-47.402].ims
4370000		2	Image 1	111	AZ DAPI.icsx_[ibrx_2023-09-20T10-16-47.402]	700001	0	AZ DAPI.icsx_[ibrx_2023-09-20T10-16-47.402]	700001	61223 PLA PARP1 HIF1A _q_Normo Rev Position001 Image 17_[ims1_2023-09-20T10-16-47.402].ims	/Users/mzglab_user/Desktop/esv/pla hif1a parp1 2023/imaris/normoxia/reversine/61223 PLA PARP1 HIF1A _q_Normo Rev Position001 Image 17_[ims1_2023-09-20T10-16-47.402].ims
2490000		2	Image 1	112	AZ DAPI.icsx_[ibrx_2023-09-20T10-16-47.402]	700001	2	AZ DAPI.icsx_[ibrx_2023-09-20T10-16-47.402]	700001	61223 PLA PARP1 HIF1A _q_Normo Rev Position001 Image 17_[ims1_2023-09-20T10-16-47.402].ims	/Users/mzglab_user/Desktop/esv/pla hif1a parp1 2023/imaris/normoxia/reversine/61223 PLA PARP1 HIF1A _q_Normo Rev Position001 Image 17_[ims1_2023-09-20T10-16-47.402].ims
5040000		2	Image 1	113	AZ DAPI.icsx_[ibrx_2023-09-20T10-16-47.402]	700001	18	AZ DAPI.icsx_[ibrx_2023-09-20T10-16-47.402]	700001	61223 PLA PARP1 HIF1A _q_Normo Rev Position001 Image 17_[ims1_2023-09-20T10-16-47.402].ims	/Users/mzglab_user/Desktop/esv/pla hif1a parp1 2023/imaris/normoxia/reversine/61223 PLA PARP1 HIF1A _q_Normo Rev Position001 Image 17_[ims1_2023-09-20T10-16-47.402].ims
2730000		2	Image 1	114	AZ DAPI.icsx_[ibrx_2023-09-20T10-16-47.402]	700001	25	AZ DAPI.icsx_[ibrx_2023-09-20T10-16-47.402]	700001	61223 PLA PARP1 HIF1A _q_Normo Rev Position001 Image 17_[ims1_2023-09-20T10-16-47.402].ims	/Users/mzglab_user/Desktop/esv/pla hif1a parp1 2023/imaris/normoxia/reversine/61223 PLA PARP1 HIF1A _q_Normo Rev Position001 Image 17_[ims1_2023-09-20T10-16-47.402].ims
1640000		2	Image 1	115	AZ DAPI.icsx_[ibrx_2023-09-20T10-16-47.402]	700001	27	AZ DAPI.icsx_[ibrx_2023-09-20T10-16-47.402]	700001	61223 PLA PARP1 HIF1A _q_Normo Rev Position001 Image 17_[ims1_2023-09-20T10-16-47.402].ims	/Users/mzglab_user/Desktop/esv/pla hif1a parp1 2023/imaris/normoxia/reversine/61223 PLA PARP1 HIF1A _q_Normo Rev Position001 Image 17_[ims1_2023-09-20T10-16-47.402].ims
1130000		2	Image 1	116	AZ DAPI.icsx_[ibrx_2023-09-20T10-16-47.402]	700001	45	AZ DAPI.icsx_[ibrx_2023-09-20T10-16-47.402]	700001	61223 PLA PARP1 HIF1A _q_Normo Rev Position001 Image 17_[ims1_2023-09-20T10-16-47.402].ims	/Users/mzglab_user/Desktop/esv/pla hif1a parp1 2023/imaris/normoxia/reversine/61223 PLA PARP1 HIF1A _q_Normo Rev Position001 Image 17_[ims1_2023-09-20T10-16-47.402].ims
3610000		2	Image 1	117	AZ DAPI.icsx_[ibrx_2023-09-20T10-16-47.402]	700001	46	AZ DAPI.icsx_[ibrx_2023-09-20T10-16-47.402]	700001	61223 PLA PARP1 HIF1A _q_Normo Rev Position001 Image 17_[ims1_2023-09-20T10-16-47.402].ims	/Users/mzglab_user/Desktop/esv/pla hif1a parp1 2023/imaris/normoxia/reversine/61223 PLA PARP1 HIF1A _q_Normo Rev Position001 Image 17_[ims1_2023-09-20T10-16-47.402].ims
2660000		2	Image 1	118	AZ DAPI.icsx_[ibrx_2023-09-20T10-16-47.402]	700001	47	AZ DAPI.icsx_[ibrx_2023-09-20T10-16-47.402]	700001	61223 PLA PARP1 HIF1A _q_Normo Rev Position001 Image 17_[ims1_2023-09-20T10-16-47.402].ims	/Users/mzglab_user/Desktop/esv/pla hif1a parp1 2023/imaris/normoxia/reversine/61223 PLA PARP1 HIF1A _q_Normo Rev Position001 Image 17_[ims1_2023-09-20T10-16-47.402].ims
3110000		2	Image 1	119	AZ DAPI.icsx_[ibrx_2023-09-20T10-16-47.402]	700001	35	AZ DAPI.icsx_[ibrx_2023-09-20T10-16-47.402]	700001	61223 PLA PARP1 HIF1A _r_Normo Rev Position002 Image 18_[ims1_2023-09-20T10-16-47.402].ims	/Users/mzglab_user/Desktop/esv/pla hif1a parp1 2023/imaris/normoxia/reversine/61223 PLA PARP1 HIF1A _r_Normo Rev Position002 Image 18_[ims1_2023-09-20T10-16-47.402].ims
2780000		2	Image 1	120	AZ DAPI.icsx_[ibrx_2023-09-20T10-16-47.402]	700001	41	AZ DAPI.icsx_[ibrx_2023-09-20T10-16-47.402]	700001	61223 PLA PARP1 HIF1A _r_Normo Rev Position002 Image 18_[ims1_2023-09-20T10-16-47.402].ims	/Users/mzglab_user/Desktop/esv/pla hif1a parp1 2023/imaris/normoxia/reversine/61223 PLA PARP1 HIF1A _r_Normo Rev Position002 Image 18_[ims1_2023-09-20T10-16-47.402].ims
2270000		2	Image 1	121	AZ DAPI.icsx_[ibrx_2023-09-20T10-16-47.402]	700001	45	AZ DAPI.icsx_[ibrx_2023-09-20T10-16-47.402]	700001	61223 PLA PARP1 HIF1A _r_Normo Rev Position002 Image 18_[ims1_2023-09-20T10-16-47.402].ims	/Users/mzglab_user/Desktop/esv/pla hif1a parp1 2023/imaris/normoxia/reversine/61223 PLA PARP1 HIF1A _r_Normo Rev Position002 Image 18_[ims1_2023-09-20T10-16-47.402].ims
1420000		2	Image 1	122	AZ DAPI.icsx_[ibrx_2023-09-20T10-16-47.402]	700001	54	AZ DAPI.icsx_[ibrx_2023-09-20T10-16-47.402]	700001	61223 PLA PARP1 HIF1A _r_Normo Rev Position002 Image 18_[ims1_2023-09-20T10-16-47.402].ims	/Users/mzglab_user/Desktop/esv/pla hif1a parp1 2023/imaris/normoxia/reversine/61223 PLA PARP1 HIF1A _r_Normo Rev Position002 Image 18_[ims1_2023-09-20T10-16-47.402].ims
4770000		2	Image 1	123	AZ DAPI.icsx_[ibrx_2023-09-20T10-16-47.402]	700001	63	AZ DAPI.icsx_[ibrx_2023-09-20T10-16-47.402]	700001	61223 PLA PARP1 HIF1A _r_Normo Rev Position002 Image 18_[ims1_2023-09-20T10-16-47.402].ims	/Users/mzglab_user/Desktop/esv/pla hif1a parp1 2023/imaris/normoxia/reversine/61223 PLA PARP1 HIF1A _r_Normo Rev Position002 Image 18_[ims1_2023-09-20T10-16-47.402].ims
3160000		2	Image 1	124	AZ DAPI.icsx_[ibrx_2023-09-20T10-16-47.402]	700001	75	AZ DAPI.icsx_[ibrx_2023-09-20T10-16-47.402]	700001	61223 PLA PARP1 HIF1A _r_Normo Rev Position002 Image 18_[ims1_2023-09-20T10-16-47.402].ims	/Users/mzglab_user/Desktop/esv/pla hif1a parp1 2023/imaris/normoxia/reversine/61223 PLA PARP1 HIF1A _r_Normo Rev Position002 Image 18_[ims1_2023-09-20T10-16-47.402].ims
1920000		2	Image 1	125	AZ DAPI.icsx_[ibrx_2023-09-20T10-16-47.402]	700001	84	AZ DAPI.icsx_[ibrx_2023-09-20T10-16-47.402]	700001	61223 PLA PARP1 HIF1A _r_Normo Rev Position002 Image 18_[ims1_2023-09-20T10-16-47.402].ims	/Users/mzglab_user/Desktop/esv/pla hif1a parp1 2023/imaris/normoxia/reversine/61223 PLA PARP1 HIF1A _r_Normo Rev Position002 Image 18_[ims1_2023-09-20T10-16-47.402].ims
1690000		2	Image 1	126	AZ DAPI.icsx_[ibrx_2023-09-20T10-16-47.402]	700001	87	AZ DAPI.icsx_[ibrx_2023-09-20T10-16-47.402]	700001	61223 PLA PARP1 HIF1A _r_Normo Rev Position002 Image 18_[ims1_2023-09-20T10-16-47.402].ims	/Users/mzglab_user/Desktop/esv/pla hif1a parp1 2023/imaris/normoxia/reversine/61223 PLA PARP1 HIF1A _r_Normo Rev Position002 Image 18_[ims1_2023-09-20T10-16-47.402].ims
1080000		2	Image 1	127	AZ DAPI.icsx_[ibrx_2023-09-20T10-16-47.402]	700001	3	AZ DAPI.icsx_[ibrx_2023-09-20T10-16-47.402]	700001	61223 PLA PARP1 HIF1A _s_Normo Rev Position003 Image 19_[ims1_2023-09-20T10-16-47.402].ims	/Users/mzglab_user/Desktop/esv/pla hif1a parp1 2023/imaris/normoxia/reversine/61223 PLA PARP1 HIF1A _s_Normo Rev Position003 Image 19_[ims1_2023-09-20T10-16-47.402].ims
973000		2	Image 1	128	AZ DAPI.icsx_[ibrx_2023-09-20T10-16-47.402]	700001	8	AZ DAPI.icsx_[ibrx_2023-09-20T10-16-47.402]	700001	61223 PLA PARP1 HIF1A _s_Normo Rev Position003 Image 19_[ims1_2023-09-20T10-16-47.402].ims	/Users/mzglab_user/Desktop/esv/pla hif1a parp1 2023/imaris/normoxia/reversine/61223 PLA PARP1 HIF1A _s_Normo Rev Position003 Image 19_[ims1_2023-09-20T10-16-47.402].ims
951000		2	Image 1	129	AZ DAPI.icsx_[ibrx_2023-09-20T10-16-47.402]	700001	9	AZ DAPI.icsx_[ibrx_2023-09-20T10-16-47.402]	700001	61223 PLA PARP1 HIF1A _s_Normo Rev Position003 Image 19_[ims1_2023-09-20T10-16-47.402].ims	/Users/mzglab_user/Desktop/esv/pla hif1a parp1 2023/imaris/normoxia/reversine/61223 PLA PARP1 HIF1A _s_Normo Rev Position003 Image 19_[ims1_2023-09-20T10-16-47.402].ims
1190000		2	Image 1	130	AZ DAPI.icsx_[ibrx_2023-09-20T10-16-47.402]	700001	10	AZ DAPI.icsx_[ibrx_2023-09-20T10-16-47.402]	700001	61223 PLA PARP1 HIF1A _s_Normo Rev Position003 Image 19_[ims1_2023-09-20T10-16-47.402].ims	/Users/mzglab_user/Desktop/esv/pla hif1a parp1 2023/imaris/normoxia/reversine/61223 PLA PARP1 HIF1A _s_Normo Rev Position003 Image 19_[ims1_2023-09-20T10-16-47.402].ims
2140000		2	Image 1	131	AZ DAPI.icsx_[ibrx_2023-09-20T10-16-47.402]	700001	19	AZ DAPI.icsx_[ibrx_2023-09-20T10-16-47.402]	700001	61223 PLA PARP1 HIF1A _s_Normo Rev Position003 Image 19_[ims1_2023-09-20T10-16-47.402].ims	/Users/mzglab_user/Desktop/esv/pla hif1a parp1 2023/imaris/normoxia/reversine/61223 PLA PARP1 HIF1A _s_Normo Rev Position003 Image 19_[ims1_2023-09-20T10-16-47.402].ims
773000		2	Image 1	132	AZ DAPI.icsx_[ibrx_2023-09-20T10-16-47.402]	700001	23	AZ DAPI.icsx_[ibrx_2023-09-20T10-16-47.402]	700001	61223 PLA PARP1 HIF1A _s_Normo Rev Position003 Image 19_[ims1_2023-09-20T10-16-47.402].ims	/Users/mzglab_user/Desktop/esv/pla hif1a parp1 2023/imaris/normoxia/reversine/61223 PLA PARP1 HIF1A _s_Normo Rev Position003 Image 19_[ims1_2023-09-20T10-16-47.402].ims
1260000		2	Image 1	133	AZ DAPI.icsx_[ibrx_2023-09-20T10-16-47.402]	700001	25	AZ DAPI.icsx_[ibrx_2023-09-20T10-16-47.402]	700001	61223 PLA PARP1 HIF1A _s_Normo Rev Position003 Image 19_[ims1_2023-09-20T10-16-47.402].ims	/Users/mzglab_user/Desktop/esv/pla hif1a parp1 2023/imaris/normoxia/reversine/61223 PLA PARP1 HIF1A _s_Normo Rev Position003 Image 19_[ims1_2023-09-20T10-16-47.402].ims
1030000		2	Image 1	134	AZ DAPI.icsx_[ibrx_2023-09-20T10-16-47.402]	700001	27	AZ DAPI.icsx_[ibrx_2023-09-20T10-16-47.402]	700001	61223 PLA PARP1 HIF1A _s_Normo Rev Position003 Image 19_[ims1_2023-09-20T10-16-47.402].ims	/Users/mzglab_user/Desktop/esv/pla hif1a parp1 2023/imaris/normoxia/reversine/61223 PLA PARP1 HIF1A _s_Normo Rev Position003 Image 19_[ims1_2023-09-20T10-16-47.402].ims
2200000		2	Image 1	135	AZ DAPI.icsx_[ibrx_2023-09-20T10-16-47.402]	700001	6	AZ DAPI.icsx_[ibrx_2023-09-20T10-16-47.402]	700001	61223 PLA PARP1 HIF1A _t_Normo Rev Position004 Image 20_[ims1_2023-09-20T10-16-47.402].ims	/Users/mzglab_user/Desktop/esv/pla hif1a parp1 2023/imaris/normoxia/reversine/61223 PLA PARP1 HIF1A _t_Normo Rev Position004 Image 20_[ims1_2023-09-20T10-16-47.402].ims
1990000		2	Image 1	136	AZ DAPI.icsx_[ibrx_2023-09-20T10-16-47.402]	700001	33	AZ DAPI.icsx_[ibrx_2023-09-20T10-16-47.402]	700001	61223 PLA PARP1 HIF1A _t_Normo Rev Position004 Image 20_[ims1_2023-09-20T10-16-47.402].ims	/Users/mzglab_user/Desktop/esv/pla hif1a parp1 2023/imaris/normoxia/reversine/61223 PLA PARP1 HIF1A _t_Normo Rev Position004 Image 20_[ims1_2023-09-20T10-16-47.402].ims
2180000		2	Image 1	137	AZ DAPI.icsx_[ibrx_2023-09-20T10-16-47.402]	700001	34	AZ DAPI.icsx_[ibrx_2023-09-20T10-16-47.402]	700001	61223 PLA PARP1 HIF1A _t_Normo Rev Position004 Image 20_[ims1_2023-09-20T10-16-47.402].ims	/Users/mzglab_user/Desktop/esv/pla hif1a parp1 2023/imaris/normoxia/reversine/61223 PLA PARP1 HIF1A _t_Normo Rev Position004 Image 20_[ims1_2023-09-20T10-16-47.402].ims
2270000		2	Image 1	138	AZ DAPI.icsx_[ibrx_2023-09-20T10-16-47.402]	700001	40	AZ DAPI.icsx_[ibrx_2023-09-20T10-16-47.402]	700001	61223 PLA PARP1 HIF1A _t_Normo Rev Position004 Image 20_[ims1_2023-09-20T10-16-47.402].ims	/Users/mzglab_user/Desktop/esv/pla hif1a parp1 2023/imaris/normoxia/reversine/61223 PLA PARP1 HIF1A _t_Normo Rev Position004 Image 20_[ims1_2023-09-20T10-16-47.402].ims
2510000		2	Image 1	139	AZ DAPI.icsx_[ibrx_2023-09-20T10-16-47.402]	700001	46	AZ DAPI.icsx_[ibrx_2023-09-20T10-16-47.402]	700001	61223 PLA PARP1 HIF1A _t_Normo Rev Position004 Image 20_[ims1_2023-09-20T10-16-47.402].ims	/Users/mzglab_user/Desktop/esv/pla hif1a parp1 2023/imaris/normoxia/reversine/61223 PLA PARP1 HIF1A _t_Normo Rev Position004 Image 20_[ims1_2023-09-20T10-16-47.402].ims
3430000		2	Image 1	140	AZ DAPI.icsx_[ibrx_2023-09-20T10-16-47.402]	700001	48	AZ DAPI.icsx_[ibrx_2023-09-20T10-16-47.402]	700001	61223 PLA PARP1 HIF1A _t_Normo Rev Position004 Image 20_[ims1_2023-09-20T10-16-47.402].ims	/Users/mzglab_user/Desktop/esv/pla hif1a parp1 2023/imaris/normoxia/reversine/61223 PLA PARP1 HIF1A _t_Normo Rev Position004 Image 20_[ims1_2023-09-20T10-16-47.402].ims
1510000		2	Image 1	141	AZ DAPI.icsx_[ibrx_2023-09-20T10-16-47.402]	700001	0	AZ DAPI.icsx_[ibrx_2023-09-20T10-16-47.402]	700001	61223 PLA PARP1 HIF1A _u_Normo Rev Position005 Image 21_[ims1_2023-09-20T10-16-47.402].ims	/Users/mzglab_user/Desktop/esv/pla hif1a parp1 2023/imaris/normoxia/reversine/61223 PLA PARP1 HIF1A _u_Normo Rev Position005 Image 21_[ims1_2023-09-20T10-16-47.402].ims
3760000		2	Image 1	142	AZ DAPI.icsx_[ibrx_2023-09-20T10-16-47.402]	700001	2	AZ DAPI.icsx_[ibrx_2023-09-20T10-16-47.402]	700001	61223 PLA PARP1 HIF1A _u_Normo Rev Position005 Image 21_[ims1_2023-09-20T10-16-47.402].ims	/Users/mzglab_user/Desktop/esv/pla hif1a parp1 2023/imaris/normoxia/reversine/61223 PLA PARP1 HIF1A _u_Normo Rev Position005 Image 21_[ims1_2023-09-20T10-16-47.402].ims
1590000		2	Image 1	143	AZ DAPI.icsx_[ibrx_2023-09-20T10-16-47.402]	700001	5	AZ DAPI.icsx_[ibrx_2023-09-20T10-16-47.402]	700001	61223 PLA PARP1 HIF1A _u_Normo Rev Position005 Image 21_[ims1_2023-09-20T10-16-47.402].ims	/Users/mzglab_user/Desktop/esv/pla hif1a parp1 2023/imaris/normoxia/reversine/61223 PLA PARP1 HIF1A _u_Normo Rev Position005 Image 21_[ims1_2023-09-20T10-16-47.402].ims
2370000		2	Image 1	144	AZ DAPI.icsx_[ibrx_2023-09-20T10-16-47.402]	700001	6	AZ DAPI.icsx_[ibrx_2023-09-20T10-16-47.402]	700001	61223 PLA PARP1 HIF1A _u_Normo Rev Position005 Image 21_[ims1_2023-09-20T10-16-47.402].ims	/Users/mzglab_user/Desktop/esv/pla hif1a parp1 2023/imaris/normoxia/reversine/61223 PLA PARP1 HIF1A _u_Normo Rev Position005 Image 21_[ims1_2023-09-20T10-16-47.402].ims
1100000		2	Image 1	145	AZ DAPI.icsx_[ibrx_2023-09-20T10-16-47.402]	700001	9	AZ DAPI.icsx_[ibrx_2023-09-20T10-16-47.402]	700001	61223 PLA PARP1 HIF1A _u_Normo Rev Position005 Image 21_[ims1_2023-09-20T10-16-47.402].ims	/Users/mzglab_user/Desktop/esv/pla hif1a parp1 2023/imaris/normoxia/reversine/61223 PLA PARP1 HIF1A _u_Normo Rev Position005 Image 21_[ims1_2023-09-20T10-16-47.402].ims
4130000		2	Image 1	146	AZ DAPI.icsx_[ibrx_2023-09-20T10-16-47.402]	700001	10	AZ DAPI.icsx_[ibrx_2023-09-20T10-16-47.402]	700001	61223 PLA PARP1 HIF1A _u_Normo Rev Position005 Image 21_[ims1_2023-09-20T10-16-47.402].ims	/Users/mzglab_user/Desktop/esv/pla hif1a parp1 2023/imaris/normoxia/reversine/61223 PLA PARP1 HIF1A _u_Normo Rev Position005 Image 21_[ims1_2023-09-20T10-16-47.402].ims
2500000		2	Image 1	147	AZ DAPI.icsx_[ibrx_2023-09-20T10-16-47.402]	700001	11	AZ DAPI.icsx_[ibrx_2023-09-20T10-16-47.402]	700001	61223 PLA PARP1 HIF1A _u_Normo Rev Position005 Image 21_[ims1_2023-09-20T10-16-47.402].ims	/Users/mzglab_user/Desktop/esv/pla hif1a parp1 2023/imaris/normoxia/reversine/61223 PLA PARP1 HIF1A _u_Normo Rev Position005 Image 21_[ims1_2023-09-20T10-16-47.402].ims
3460000		2	Image 1	148	AZ DAPI.icsx_[ibrx_2023-09-20T10-16-47.402]	700001	13	AZ DAPI.icsx_[ibrx_2023-09-20T10-16-47.402]	700001	61223 PLA PARP1 HIF1A _u_Normo Rev Position005 Image 21_[ims1_2023-09-20T10-16-47.402].ims	/Users/mzglab_user/Desktop/esv/pla hif1a parp1 2023/imaris/normoxia/reversine/61223 PLA PARP1 HIF1A _u_Normo Rev Position005 Image 21_[ims1_2023-09-20T10-16-47.402].ims
1900000		2	Image 1	149	AZ DAPI.icsx_[ibrx_2023-09-20T10-16-47.402]	700001	23	AZ DAPI.icsx_[ibrx_2023-09-20T10-16-47.402]	700001	61223 PLA PARP1 HIF1A _v_Normo Rev Position006 Image 22_[ims1_2023-09-20T10-16-47.402].ims	/Users/mzglab_user/Desktop/esv/pla hif1a parp1 2023/imaris/normoxia/reversine/61223 PLA PARP1 HIF1A _v_Normo Rev Position006 Image 22_[ims1_2023-09-20T10-16-47.402].ims
1870000		2	Image 1	150	AZ DAPI.icsx_[ibrx_2023-09-20T10-16-47.402]	700001	28	AZ DAPI.icsx_[ibrx_2023-09-20T10-16-47.402]	700001	61223 PLA PARP1 HIF1A _v_Normo Rev Position006 Image 22_[ims1_2023-09-20T10-16-47.402].ims	/Users/mzglab_user/Desktop/esv/pla hif1a parp1 2023/imaris/normoxia/reversine/61223 PLA PARP1 HIF1A _v_Normo Rev Position006 Image 22_[ims1_2023-09-20T10-16-47.402].ims
2070000		2	Image 1	151	AZ DAPI.icsx_[ibrx_2023-09-20T10-16-47.402]	700001	30	AZ DAPI.icsx_[ibrx_2023-09-20T10-16-47.402]	700001	61223 PLA PARP1 HIF1A _v_Normo Rev Position006 Image 22_[ims1_2023-09-20T10-16-47.402].ims	/Users/mzglab_user/Desktop/esv/pla hif1a parp1 2023/imaris/normoxia/reversine/61223 PLA PARP1 HIF1A _v_Normo Rev Position006 Image 22_[ims1_2023-09-20T10-16-47.402].ims
2410000		2	Image 1	152	AZ DAPI.icsx_[ibrx_2023-09-20T10-16-47.402]	700001	31	AZ DAPI.icsx_[ibrx_2023-09-20T10-16-47.402]	700001	61223 PLA PARP1 HIF1A _v_Normo Rev Position006 Image 22_[ims1_2023-09-20T10-16-47.402].ims	/Users/mzglab_user/Desktop/esv/pla hif1a parp1 2023/imaris/normoxia/reversine/61223 PLA PARP1 HIF1A _v_Normo Rev Position006 Image 22_[ims1_2023-09-20T10-16-47.402].ims
1070000		2	Image 1	153	AZ DAPI.icsx_[ibrx_2023-09-20T10-16-47.402]	700001	32	AZ DAPI.icsx_[ibrx_2023-09-20T10-16-47.402]	700001	61223 PLA PARP1 HIF1A _v_Normo Rev Position006 Image 22_[ims1_2023-09-20T10-16-47.402].ims	/Users/mzglab_user/Desktop/esv/pla hif1a parp1 2023/imaris/normoxia/reversine/61223 PLA PARP1 HIF1A _v_Normo Rev Position006 Image 22_[ims1_2023-09-20T10-16-47.402].ims
1480000		2	Image 1	154	AZ DAPI.icsx_[ibrx_2023-09-20T10-16-47.402]	700001	36	AZ DAPI.icsx_[ibrx_2023-09-20T10-16-47.402]	700001	61223 PLA PARP1 HIF1A _v_Normo Rev Position006 Image 22_[ims1_2023-09-20T10-16-47.402].ims	/Users/mzglab_user/Desktop/esv/pla hif1a parp1 2023/imaris/normoxia/reversine/61223 PLA PARP1 HIF1A _v_Normo Rev Position006 Image 22_[ims1_2023-09-20T10-16-47.402].ims
1410000		2	Image 1	155	AZ DAPI.icsx_[ibrx_2023-09-20T10-16-47.402]	700001	41	AZ DAPI.icsx_[ibrx_2023-09-20T10-16-47.402]	700001	61223 PLA PARP1 HIF1A _v_Normo Rev Position006 Image 22_[ims1_2023-09-20T10-16-47.402].ims	/Users/mzglab_user/Desktop/esv/pla hif1a parp1 2023/imaris/normoxia/reversine/61223 PLA PARP1 HIF1A _v_Normo Rev Position006 Image 22_[ims1_2023-09-20T10-16-47.402].ims
1750000		2	Image 1	156	AZ DAPI.icsx_[ibrx_2023-09-20T10-16-47.402]	700001	45	AZ DAPI.icsx_[ibrx_2023-09-20T10-16-47.402]	700001	61223 PLA PARP1 HIF1A _v_Normo Rev Position006 Image 22_[ims1_2023-09-20T10-16-47.402].ims	/Users/mzglab_user/Desktop/esv/pla hif1a parp1 2023/imaris/normoxia/reversine/61223 PLA PARP1 HIF1A _v_Normo Rev Position006 Image 22_[ims1_2023-09-20T10-16-47.402].ims
2390000		2	Image 1	157	AZ DAPI.icsx_[ibrx_2023-09-20T10-16-47.402]	700001	8	AZ DAPI.icsx_[ibrx_2023-09-20T10-16-47.402]	700001	61223 PLA PARP1 HIF1A _w_Normo Rev Position007 Image 23_[ims1_2023-09-20T10-16-47.402].ims	/Users/mzglab_user/Desktop/esv/pla hif1a parp1 2023/imaris/normoxia/reversine/61223 PLA PARP1 HIF1A _w_Normo Rev Position007 Image 23_[ims1_2023-09-20T10-16-47.402].ims
1450000		2	Image 1	158	AZ DAPI.icsx_[ibrx_2023-09-20T10-16-47.402]	700001	16	AZ DAPI.icsx_[ibrx_2023-09-20T10-16-47.402]	700001	61223 PLA PARP1 HIF1A _w_Normo Rev Position007 Image 23_[ims1_2023-09-20T10-16-47.402].ims	/Users/mzglab_user/Desktop/esv/pla hif1a parp1 2023/imaris/normoxia/reversine/61223 PLA PARP1 HIF1A _w_Normo Rev Position007 Image 23_[ims1_2023-09-20T10-16-47.402].ims
1840000		2	Image 1	159	AZ DAPI.icsx_[ibrx_2023-09-20T10-16-47.402]	700001	22	AZ DAPI.icsx_[ibrx_2023-09-20T10-16-47.402]	700001	61223 PLA PARP1 HIF1A _w_Normo Rev Position007 Image 23_[ims1_2023-09-20T10-16-47.402].ims	/Users/mzglab_user/Desktop/esv/pla hif1a parp1 2023/imaris/normoxia/reversine/61223 PLA PARP1 HIF1A _w_Normo Rev Position007 Image 23_[ims1_2023-09-20T10-16-47.402].ims
1410000		2	Image 1	160	AZ DAPI.icsx_[ibrx_2023-09-20T10-16-47.402]	700001	43	AZ DAPI.icsx_[ibrx_2023-09-20T10-16-47.402]	700001	61223 PLA PARP1 HIF1A _w_Normo Rev Position007 Image 23_[ims1_2023-09-20T10-16-47.402].ims	/Users/mzglab_user/Desktop/esv/pla hif1a parp1 2023/imaris/normoxia/reversine/61223 PLA PARP1 HIF1A _w_Normo Rev Position007 Image 23_[ims1_2023-09-20T10-16-47.402].ims
1720000		2	Image 1	161	AZ DAPI.icsx_[ibrx_2023-09-20T10-16-47.402]	700001	44	AZ DAPI.icsx_[ibrx_2023-09-20T10-16-47.402]	700001	61223 PLA PARP1 HIF1A _w_Normo Rev Position007 Image 23_[ims1_2023-09-20T10-16-47.402].ims	/Users/mzglab_user/Desktop/esv/pla hif1a parp1 2023/imaris/normoxia/reversine/61223 PLA PARP1 HIF1A _w_Normo Rev Position007 Image 23_[ims1_2023-09-20T10-16-47.402].ims
1950000		2	Image 1	162	AZ DAPI.icsx_[ibrx_2023-09-20T10-16-47.402]	700001	58	AZ DAPI.icsx_[ibrx_2023-09-20T10-16-47.402]	700001	61223 PLA PARP1 HIF1A _w_Normo Rev Position007 Image 23_[ims1_2023-09-20T10-16-47.402].ims	/Users/mzglab_user/Desktop/esv/pla hif1a parp1 2023/imaris/normoxia/reversine/61223 PLA PARP1 HIF1A _w_Normo Rev Position007 Image 23_[ims1_2023-09-20T10-16-47.402].ims
4650000		2	Image 1	163	AZ DAPI.icsx_[ibrx_2023-09-20T10-16-47.402]	700001	70	AZ DAPI.icsx_[ibrx_2023-09-20T10-16-47.402]	700001	61223 PLA PARP1 HIF1A _w_Normo Rev Position007 Image 23_[ims1_2023-09-20T10-16-47.402].ims	/Users/mzglab_user/Desktop/esv/pla hif1a parp1 2023/imaris/normoxia/reversine/61223 PLA PARP1 HIF1A _w_Normo Rev Position007 Image 23_[ims1_2023-09-20T10-16-47.402].ims
2420000		2	Image 1	164	AZ DAPI.icsx_[ibrx_2023-09-20T10-16-47.402]	700001	76	AZ DAPI.icsx_[ibrx_2023-09-20T10-16-47.402]	700001	61223 PLA PARP1 HIF1A _w_Normo Rev Position007 Image 23_[ims1_2023-09-20T10-16-47.402].ims	/Users/mzglab_user/Desktop/esv/pla hif1a parp1 2023/imaris/normoxia/reversine/61223 PLA PARP1 HIF1A _w_Normo Rev Position007 Image 23_[ims1_2023-09-20T10-16-47.402].ims
3790000		2	Image 1	165	AZ DAPI.icsx_[ibrx_2023-09-20T10-16-47.402]	700001	7	AZ DAPI.icsx_[ibrx_2023-09-20T10-16-47.402]	700001	61223 PLA PARP1 HIF1A _x_Normo Rev Position008 Image 24_[ims1_2023-09-20T10-16-47.402].ims	/Users/mzglab_user/Desktop/esv/pla hif1a parp1 2023/imaris/normoxia/reversine/61223 PLA PARP1 HIF1A _x_Normo Rev Position008 Image 24_[ims1_2023-09-20T10-16-47.402].ims
3260000		2	Image 1	166	AZ DAPI.icsx_[ibrx_2023-09-20T10-16-47.402]	700001	8	AZ DAPI.icsx_[ibrx_2023-09-20T10-16-47.402]	700001	61223 PLA PARP1 HIF1A _x_Normo Rev Position008 Image 24_[ims1_2023-09-20T10-16-47.402].ims	/Users/mzglab_user/Desktop/esv/pla hif1a parp1 2023/imaris/normoxia/reversine/61223 PLA PARP1 HIF1A _x_Normo Rev Position008 Image 24_[ims1_2023-09-20T10-16-47.402].ims
2360000		2	Image 1	167	AZ DAPI.icsx_[ibrx_2023-09-20T10-16-47.402]	700001	10	AZ DAPI.icsx_[ibrx_2023-09-20T10-16-47.402]	700001	61223 PLA PARP1 HIF1A _x_Normo Rev Position008 Image 24_[ims1_2023-09-20T10-16-47.402].ims	/Users/mzglab_user/Desktop/esv/pla hif1a parp1 2023/imaris/normoxia/reversine/61223 PLA PARP1 HIF1A _x_Normo Rev Position008 Image 24_[ims1_2023-09-20T10-16-47.402].ims
2350000		2	Image 1	168	AZ DAPI.icsx_[ibrx_2023-09-20T10-16-47.402]	700001	12	AZ DAPI.icsx_[ibrx_2023-09-20T10-16-47.402]	700001	61223 PLA PARP1 HIF1A _x_Normo Rev Position008 Image 24_[ims1_2023-09-20T10-16-47.402].ims	/Users/mzglab_user/Desktop/esv/pla hif1a parp1 2023/imaris/normoxia/reversine/61223 PLA PARP1 HIF1A _x_Normo Rev Position008 Image 24_[ims1_2023-09-20T10-16-47.402].ims
1450000		2	Image 1	169	AZ DAPI.icsx_[ibrx_2023-09-20T10-16-47.402]	700001	13	AZ DAPI.icsx_[ibrx_2023-09-20T10-16-47.402]	700001	61223 PLA PARP1 HIF1A _x_Normo Rev Position008 Image 24_[ims1_2023-09-20T10-16-47.402].ims	/Users/mzglab_user/Desktop/esv/pla hif1a parp1 2023/imaris/normoxia/reversine/61223 PLA PARP1 HIF1A _x_Normo Rev Position008 Image 24_[ims1_2023-09-20T10-16-47.402].ims
2820000		2	Image 1	170	AZ DAPI.icsx_[ibrx_2023-09-20T10-16-47.402]	700001	14	AZ DAPI.icsx_[ibrx_2023-09-20T10-16-47.402]	700001	61223 PLA PARP1 HIF1A _x_Normo Rev Position008 Image 24_[ims1_2023-09-20T10-16-47.402].ims	/Users/mzglab_user/Desktop/esv/pla hif1a parp1 2023/imaris/normoxia/reversine/61223 PLA PARP1 HIF1A _x_Normo Rev Position008 Image 24_[ims1_2023-09-20T10-16-47.402].ims
1550000		2	Image 1	171	AZ DAPI.icsx_[ibrx_2023-09-20T10-16-47.402]	700001	15	AZ DAPI.icsx_[ibrx_2023-09-20T10-16-47.402]	700001	61223 PLA PARP1 HIF1A _x_Normo Rev Position008 Image 24_[ims1_2023-09-20T10-16-47.402].ims	/Users/mzglab_user/Desktop/esv/pla hif1a parp1 2023/imaris/normoxia/reversine/61223 PLA PARP1 HIF1A _x_Normo Rev Position008 Image 24_[ims1_2023-09-20T10-16-47.402].ims
1430000		2	Image 1	172	AZ DAPI.icsx_[ibrx_2023-09-20T10-16-47.402]	700001	16	AZ DAPI.icsx_[ibrx_2023-09-20T10-16-47.402]	700001	61223 PLA PARP1 HIF1A _x_Normo Rev Position008 Image 24_[ims1_2023-09-20T10-16-47.402].ims	/Users/mzglab_user/Desktop/esv/pla hif1a parp1 2023/imaris/normoxia/reversine/61223 PLA PARP1 HIF1A _x_Normo Rev Position008 Image 24_[ims1_2023-09-20T10-16-47.402].ims
0		2	Image 1	173	AZ DAPI.icsx_[ibrx_2023-09-20T10-16-47.402]	700001	22	AZ DAPI.icsx_[ibrx_2023-09-20T10-16-47.402]	700001	61223 PLA PARP1 HIF1A _y_Normo Rev Position009 Image 25_[ims1_2023-09-20T10-16-47.402].ims	/Users/mzglab_user/Desktop/esv/pla hif1a parp1 2023/imaris/normoxia/reversine/61223 PLA PARP1 HIF1A _y_Normo Rev Position009 Image 25_[ims1_2023-09-20T10-16-47.402].ims
6000000		2	Image 1	174	AZ DAPI.icsx_[ibrx_2023-09-20T10-16-47.402]	700001	16	AZ DAPI.icsx_[ibrx_2023-09-20T10-16-47.402]	700001	61223 PLA PARP1 HIF1A _z_Normo Rev Position010 Image 26_[ims1_2023-09-20T10-16-47.402].ims	/Users/mzglab_user/Desktop/esv/pla hif1a parp1 2023/imaris/normoxia/reversine/61223 PLA PARP1 HIF1A _z_Normo Rev Position010 Image 26_[ims1_2023-09-20T10-16-47.402].ims
764000		2	Image 1	175	AZ DAPI.icsx_[ibrx_2023-09-20T10-16-47.402]	700001	55	AZ DAPI.icsx_[ibrx_2023-09-20T10-16-47.402]	700001	61223 PLA PARP1 HIF1A _z_Normo Rev Position010 Image 26_[ims1_2023-09-20T10-16-47.402].ims	/Users/mzglab_user/Desktop/esv/pla hif1a parp1 2023/imaris/normoxia/reversine/61223 PLA PARP1 HIF1A _z_Normo Rev Position010 Image 26_[ims1_2023-09-20T10-16-47.402].ims
490000		2	Image 1	176	AZ DAPI.icsx_[ibrx_2023-09-20T10-16-47.402]	700001	61	AZ DAPI.icsx_[ibrx_2023-09-20T10-16-47.402]	700001	61223 PLA PARP1 HIF1A _z_Normo Rev Position010 Image 26_[ims1_2023-09-20T10-16-47.402].ims	/Users/mzglab_user/Desktop/esv/pla hif1a parp1 2023/imaris/normoxia/reversine/61223 PLA PARP1 HIF1A _z_Normo Rev Position010 Image 26_[ims1_2023-09-20T10-16-47.402].ims
36000		2	Image 1	177	AZ DAPI.icsx_[ibrx_2023-09-20T10-16-47.402]	700001	62	AZ DAPI.icsx_[ibrx_2023-09-20T10-16-47.402]	700001	61223 PLA PARP1 HIF1A _z_Normo Rev Position010 Image 26_[ims1_2023-09-20T10-16-47.402].ims	/Users/mzglab_user/Desktop/esv/pla hif1a parp1 2023/imaris/normoxia/reversine/61223 PLA PARP1 HIF1A _z_Normo Rev Position010 Image 26_[ims1_2023-09-20T10-16-47.402].ims
250000		2	Image 1	178	AZ DAPI.icsx_[ibrx_2023-09-20T10-16-47.402]	700001	88	AZ DAPI.icsx_[ibrx_2023-09-20T10-16-47.402]	700001	61223 PLA PARP1 HIF1A _z_Normo Rev Position010 Image 26_[ims1_2023-09-20T10-16-47.402].ims	/Users/mzglab_user/Desktop/esv/pla hif1a parp1 2023/imaris/normoxia/reversine/61223 PLA PARP1 HIF1A _z_Normo Rev Position010 Image 26_[ims1_2023-09-20T10-16-47.402].ims
