# Supplementary material for: HIF1A-mediated pathways promote euploid cell survival in chromosomally mosaic embryos
Source: eLife. 2025 Oct 14;13:RP101912. doi: 10.7554/eLife.101912 (PMC12520657; doi:10.7554/eLife.101912)
Supplement: Figure 3—source data 2. [file elife-101912-fig3-data2.xls]

## Sheet: Scatter Plot 1D
Scatter Plot 1D
Intensity Sum Ch=2 Img=1	Unit	Channel	Image	ID	Surpass Object	Surpass Object Data ID	Original ID	Original Component Name	Original Component ID	Original Image Name	Original Image ID
2710000		2	Image 1	30	AZ DAPI.icsx_[ibrx_2023-09-20T10-05-58.016]	700001	30	AZ DAPI.icsx_[ibrx_2023-09-20T10-05-58.016]	700001	61223 PLA PARP1 HIF1A _a_Norm DMSO Position001 Image 1_[ims1_2023-09-20T10-05-58.016].ims	/Users/mzglab_user/Desktop/esv/pla hif1a parp1 2023/imaris/normoxia/DMSO/61223 PLA PARP1 HIF1A _a_Norm DMSO Position001 Image 1_[ims1_2023-09-20T10-05-58.016].ims
3650000		2	Image 1	36	AZ DAPI.icsx_[ibrx_2023-09-20T10-05-58.016]	700001	36	AZ DAPI.icsx_[ibrx_2023-09-20T10-05-58.016]	700001	61223 PLA PARP1 HIF1A _a_Norm DMSO Position001 Image 1_[ims1_2023-09-20T10-05-58.016].ims	/Users/mzglab_user/Desktop/esv/pla hif1a parp1 2023/imaris/normoxia/DMSO/61223 PLA PARP1 HIF1A _a_Norm DMSO Position001 Image 1_[ims1_2023-09-20T10-05-58.016].ims
1870000		2	Image 1	51	AZ DAPI.icsx_[ibrx_2023-09-20T10-05-58.016]	700001	51	AZ DAPI.icsx_[ibrx_2023-09-20T10-05-58.016]	700001	61223 PLA PARP1 HIF1A _a_Norm DMSO Position001 Image 1_[ims1_2023-09-20T10-05-58.016].ims	/Users/mzglab_user/Desktop/esv/pla hif1a parp1 2023/imaris/normoxia/DMSO/61223 PLA PARP1 HIF1A _a_Norm DMSO Position001 Image 1_[ims1_2023-09-20T10-05-58.016].ims
2850000		2	Image 1	59	AZ DAPI.icsx_[ibrx_2023-09-20T10-05-58.016]	700001	59	AZ DAPI.icsx_[ibrx_2023-09-20T10-05-58.016]	700001	61223 PLA PARP1 HIF1A _a_Norm DMSO Position001 Image 1_[ims1_2023-09-20T10-05-58.016].ims	/Users/mzglab_user/Desktop/esv/pla hif1a parp1 2023/imaris/normoxia/DMSO/61223 PLA PARP1 HIF1A _a_Norm DMSO Position001 Image 1_[ims1_2023-09-20T10-05-58.016].ims
1960000		2	Image 1	64	AZ DAPI.icsx_[ibrx_2023-09-20T10-05-58.016]	700001	64	AZ DAPI.icsx_[ibrx_2023-09-20T10-05-58.016]	700001	61223 PLA PARP1 HIF1A _a_Norm DMSO Position001 Image 1_[ims1_2023-09-20T10-05-58.016].ims	/Users/mzglab_user/Desktop/esv/pla hif1a parp1 2023/imaris/normoxia/DMSO/61223 PLA PARP1 HIF1A _a_Norm DMSO Position001 Image 1_[ims1_2023-09-20T10-05-58.016].ims
3910000		2	Image 1	74	AZ DAPI.icsx_[ibrx_2023-09-20T10-05-58.016]	700001	74	AZ DAPI.icsx_[ibrx_2023-09-20T10-05-58.016]	700001	61223 PLA PARP1 HIF1A _a_Norm DMSO Position001 Image 1_[ims1_2023-09-20T10-05-58.016].ims	/Users/mzglab_user/Desktop/esv/pla hif1a parp1 2023/imaris/normoxia/DMSO/61223 PLA PARP1 HIF1A _a_Norm DMSO Position001 Image 1_[ims1_2023-09-20T10-05-58.016].ims
2970000		2	Image 1	90	AZ DAPI.icsx_[ibrx_2023-09-20T10-05-58.016]	700001	90	AZ DAPI.icsx_[ibrx_2023-09-20T10-05-58.016]	700001	61223 PLA PARP1 HIF1A _a_Norm DMSO Position001 Image 1_[ims1_2023-09-20T10-05-58.016].ims	/Users/mzglab_user/Desktop/esv/pla hif1a parp1 2023/imaris/normoxia/DMSO/61223 PLA PARP1 HIF1A _a_Norm DMSO Position001 Image 1_[ims1_2023-09-20T10-05-58.016].ims
2760000		2	Image 1	102	AZ DAPI.icsx_[ibrx_2023-09-20T10-05-58.016]	700001	102	AZ DAPI.icsx_[ibrx_2023-09-20T10-05-58.016]	700001	61223 PLA PARP1 HIF1A _a_Norm DMSO Position001 Image 1_[ims1_2023-09-20T10-05-58.016].ims	/Users/mzglab_user/Desktop/esv/pla hif1a parp1 2023/imaris/normoxia/DMSO/61223 PLA PARP1 HIF1A _a_Norm DMSO Position001 Image 1_[ims1_2023-09-20T10-05-58.016].ims
4130000		2	Image 1	103	AZ DAPI.icsx_[ibrx_2023-09-20T10-05-58.016]	700001	0	AZ DAPI.icsx_[ibrx_2023-09-20T10-05-58.016]	700001	61223 PLA PARP1 HIF1A _b_Norm DMSO Position002 Image 2_[ims1_2023-09-20T10-05-58.016].ims	/Users/mzglab_user/Desktop/esv/pla hif1a parp1 2023/imaris/normoxia/DMSO/61223 PLA PARP1 HIF1A _b_Norm DMSO Position002 Image 2_[ims1_2023-09-20T10-05-58.016].ims
1060000		2	Image 1	104	AZ DAPI.icsx_[ibrx_2023-09-20T10-05-58.016]	700001	1	AZ DAPI.icsx_[ibrx_2023-09-20T10-05-58.016]	700001	61223 PLA PARP1 HIF1A _b_Norm DMSO Position002 Image 2_[ims1_2023-09-20T10-05-58.016].ims	/Users/mzglab_user/Desktop/esv/pla hif1a parp1 2023/imaris/normoxia/DMSO/61223 PLA PARP1 HIF1A _b_Norm DMSO Position002 Image 2_[ims1_2023-09-20T10-05-58.016].ims
5200000		2	Image 1	105	AZ DAPI.icsx_[ibrx_2023-09-20T10-05-58.016]	700001	3	AZ DAPI.icsx_[ibrx_2023-09-20T10-05-58.016]	700001	61223 PLA PARP1 HIF1A _b_Norm DMSO Position002 Image 2_[ims1_2023-09-20T10-05-58.016].ims	/Users/mzglab_user/Desktop/esv/pla hif1a parp1 2023/imaris/normoxia/DMSO/61223 PLA PARP1 HIF1A _b_Norm DMSO Position002 Image 2_[ims1_2023-09-20T10-05-58.016].ims
1270000		2	Image 1	106	AZ DAPI.icsx_[ibrx_2023-09-20T10-05-58.016]	700001	4	AZ DAPI.icsx_[ibrx_2023-09-20T10-05-58.016]	700001	61223 PLA PARP1 HIF1A _b_Norm DMSO Position002 Image 2_[ims1_2023-09-20T10-05-58.016].ims	/Users/mzglab_user/Desktop/esv/pla hif1a parp1 2023/imaris/normoxia/DMSO/61223 PLA PARP1 HIF1A _b_Norm DMSO Position002 Image 2_[ims1_2023-09-20T10-05-58.016].ims
2230000		2	Image 1	107	AZ DAPI.icsx_[ibrx_2023-09-20T10-05-58.016]	700001	5	AZ DAPI.icsx_[ibrx_2023-09-20T10-05-58.016]	700001	61223 PLA PARP1 HIF1A _b_Norm DMSO Position002 Image 2_[ims1_2023-09-20T10-05-58.016].ims	/Users/mzglab_user/Desktop/esv/pla hif1a parp1 2023/imaris/normoxia/DMSO/61223 PLA PARP1 HIF1A _b_Norm DMSO Position002 Image 2_[ims1_2023-09-20T10-05-58.016].ims
1770000		2	Image 1	108	AZ DAPI.icsx_[ibrx_2023-09-20T10-05-58.016]	700001	6	AZ DAPI.icsx_[ibrx_2023-09-20T10-05-58.016]	700001	61223 PLA PARP1 HIF1A _b_Norm DMSO Position002 Image 2_[ims1_2023-09-20T10-05-58.016].ims	/Users/mzglab_user/Desktop/esv/pla hif1a parp1 2023/imaris/normoxia/DMSO/61223 PLA PARP1 HIF1A _b_Norm DMSO Position002 Image 2_[ims1_2023-09-20T10-05-58.016].ims
1330000		2	Image 1	109	AZ DAPI.icsx_[ibrx_2023-09-20T10-05-58.016]	700001	7	AZ DAPI.icsx_[ibrx_2023-09-20T10-05-58.016]	700001	61223 PLA PARP1 HIF1A _b_Norm DMSO Position002 Image 2_[ims1_2023-09-20T10-05-58.016].ims	/Users/mzglab_user/Desktop/esv/pla hif1a parp1 2023/imaris/normoxia/DMSO/61223 PLA PARP1 HIF1A _b_Norm DMSO Position002 Image 2_[ims1_2023-09-20T10-05-58.016].ims
1470000		2	Image 1	110	AZ DAPI.icsx_[ibrx_2023-09-20T10-05-58.016]	700001	11	AZ DAPI.icsx_[ibrx_2023-09-20T10-05-58.016]	700001	61223 PLA PARP1 HIF1A _b_Norm DMSO Position002 Image 2_[ims1_2023-09-20T10-05-58.016].ims	/Users/mzglab_user/Desktop/esv/pla hif1a parp1 2023/imaris/normoxia/DMSO/61223 PLA PARP1 HIF1A _b_Norm DMSO Position002 Image 2_[ims1_2023-09-20T10-05-58.016].ims
2640000		2	Image 1	111	AZ DAPI.icsx_[ibrx_2023-09-20T10-05-58.016]	700001	38	AZ DAPI.icsx_[ibrx_2023-09-20T10-05-58.016]	700001	61223 PLA PARP1 HIF1A _c_Norm DMSO Position003 Image 3_[ims1_2023-09-20T10-05-58.016].ims	/Users/mzglab_user/Desktop/esv/pla hif1a parp1 2023/imaris/normoxia/DMSO/61223 PLA PARP1 HIF1A _c_Norm DMSO Position003 Image 3_[ims1_2023-09-20T10-05-58.016].ims
4300000		2	Image 1	112	AZ DAPI.icsx_[ibrx_2023-09-20T10-05-58.016]	700001	39	AZ DAPI.icsx_[ibrx_2023-09-20T10-05-58.016]	700001	61223 PLA PARP1 HIF1A _c_Norm DMSO Position003 Image 3_[ims1_2023-09-20T10-05-58.016].ims	/Users/mzglab_user/Desktop/esv/pla hif1a parp1 2023/imaris/normoxia/DMSO/61223 PLA PARP1 HIF1A _c_Norm DMSO Position003 Image 3_[ims1_2023-09-20T10-05-58.016].ims
3400000		2	Image 1	113	AZ DAPI.icsx_[ibrx_2023-09-20T10-05-58.016]	700001	42	AZ DAPI.icsx_[ibrx_2023-09-20T10-05-58.016]	700001	61223 PLA PARP1 HIF1A _c_Norm DMSO Position003 Image 3_[ims1_2023-09-20T10-05-58.016].ims	/Users/mzglab_user/Desktop/esv/pla hif1a parp1 2023/imaris/normoxia/DMSO/61223 PLA PARP1 HIF1A _c_Norm DMSO Position003 Image 3_[ims1_2023-09-20T10-05-58.016].ims
2160000		2	Image 1	114	AZ DAPI.icsx_[ibrx_2023-09-20T10-05-58.016]	700001	57	AZ DAPI.icsx_[ibrx_2023-09-20T10-05-58.016]	700001	61223 PLA PARP1 HIF1A _c_Norm DMSO Position003 Image 3_[ims1_2023-09-20T10-05-58.016].ims	/Users/mzglab_user/Desktop/esv/pla hif1a parp1 2023/imaris/normoxia/DMSO/61223 PLA PARP1 HIF1A _c_Norm DMSO Position003 Image 3_[ims1_2023-09-20T10-05-58.016].ims
1870000		2	Image 1	115	AZ DAPI.icsx_[ibrx_2023-09-20T10-05-58.016]	700001	59	AZ DAPI.icsx_[ibrx_2023-09-20T10-05-58.016]	700001	61223 PLA PARP1 HIF1A _c_Norm DMSO Position003 Image 3_[ims1_2023-09-20T10-05-58.016].ims	/Users/mzglab_user/Desktop/esv/pla hif1a parp1 2023/imaris/normoxia/DMSO/61223 PLA PARP1 HIF1A _c_Norm DMSO Position003 Image 3_[ims1_2023-09-20T10-05-58.016].ims
1440000		2	Image 1	116	AZ DAPI.icsx_[ibrx_2023-09-20T10-05-58.016]	700001	70	AZ DAPI.icsx_[ibrx_2023-09-20T10-05-58.016]	700001	61223 PLA PARP1 HIF1A _c_Norm DMSO Position003 Image 3_[ims1_2023-09-20T10-05-58.016].ims	/Users/mzglab_user/Desktop/esv/pla hif1a parp1 2023/imaris/normoxia/DMSO/61223 PLA PARP1 HIF1A _c_Norm DMSO Position003 Image 3_[ims1_2023-09-20T10-05-58.016].ims
2660000		2	Image 1	117	AZ DAPI.icsx_[ibrx_2023-09-20T10-05-58.016]	700001	75	AZ DAPI.icsx_[ibrx_2023-09-20T10-05-58.016]	700001	61223 PLA PARP1 HIF1A _c_Norm DMSO Position003 Image 3_[ims1_2023-09-20T10-05-58.016].ims	/Users/mzglab_user/Desktop/esv/pla hif1a parp1 2023/imaris/normoxia/DMSO/61223 PLA PARP1 HIF1A _c_Norm DMSO Position003 Image 3_[ims1_2023-09-20T10-05-58.016].ims
3690000		2	Image 1	118	AZ DAPI.icsx_[ibrx_2023-09-20T10-05-58.016]	700001	87	AZ DAPI.icsx_[ibrx_2023-09-20T10-05-58.016]	700001	61223 PLA PARP1 HIF1A _c_Norm DMSO Position003 Image 3_[ims1_2023-09-20T10-05-58.016].ims	/Users/mzglab_user/Desktop/esv/pla hif1a parp1 2023/imaris/normoxia/DMSO/61223 PLA PARP1 HIF1A _c_Norm DMSO Position003 Image 3_[ims1_2023-09-20T10-05-58.016].ims
4566		2	Image 1	119	AZ DAPI.icsx_[ibrx_2023-09-20T10-05-58.016]	700001	2	AZ DAPI.icsx_[ibrx_2023-09-20T10-05-58.016]	700001	61223 PLA PARP1 HIF1A _d_Norm DMSO Position004 Image 4_[ims1_2023-09-20T10-05-58.016].ims	/Users/mzglab_user/Desktop/esv/pla hif1a parp1 2023/imaris/normoxia/DMSO/61223 PLA PARP1 HIF1A _d_Norm DMSO Position004 Image 4_[ims1_2023-09-20T10-05-58.016].ims
38600		2	Image 1	120	AZ DAPI.icsx_[ibrx_2023-09-20T10-05-58.016]	700001	5	AZ DAPI.icsx_[ibrx_2023-09-20T10-05-58.016]	700001	61223 PLA PARP1 HIF1A _d_Norm DMSO Position004 Image 4_[ims1_2023-09-20T10-05-58.016].ims	/Users/mzglab_user/Desktop/esv/pla hif1a parp1 2023/imaris/normoxia/DMSO/61223 PLA PARP1 HIF1A _d_Norm DMSO Position004 Image 4_[ims1_2023-09-20T10-05-58.016].ims
0		2	Image 1	121	AZ DAPI.icsx_[ibrx_2023-09-20T10-05-58.016]	700001	7	AZ DAPI.icsx_[ibrx_2023-09-20T10-05-58.016]	700001	61223 PLA PARP1 HIF1A _d_Norm DMSO Position004 Image 4_[ims1_2023-09-20T10-05-58.016].ims	/Users/mzglab_user/Desktop/esv/pla hif1a parp1 2023/imaris/normoxia/DMSO/61223 PLA PARP1 HIF1A _d_Norm DMSO Position004 Image 4_[ims1_2023-09-20T10-05-58.016].ims
0		2	Image 1	122	AZ DAPI.icsx_[ibrx_2023-09-20T10-05-58.016]	700001	8	AZ DAPI.icsx_[ibrx_2023-09-20T10-05-58.016]	700001	61223 PLA PARP1 HIF1A _d_Norm DMSO Position004 Image 4_[ims1_2023-09-20T10-05-58.016].ims	/Users/mzglab_user/Desktop/esv/pla hif1a parp1 2023/imaris/normoxia/DMSO/61223 PLA PARP1 HIF1A _d_Norm DMSO Position004 Image 4_[ims1_2023-09-20T10-05-58.016].ims
0		2	Image 1	123	AZ DAPI.icsx_[ibrx_2023-09-20T10-05-58.016]	700001	10	AZ DAPI.icsx_[ibrx_2023-09-20T10-05-58.016]	700001	61223 PLA PARP1 HIF1A _d_Norm DMSO Position004 Image 4_[ims1_2023-09-20T10-05-58.016].ims	/Users/mzglab_user/Desktop/esv/pla hif1a parp1 2023/imaris/normoxia/DMSO/61223 PLA PARP1 HIF1A _d_Norm DMSO Position004 Image 4_[ims1_2023-09-20T10-05-58.016].ims
6382		2	Image 1	124	AZ DAPI.icsx_[ibrx_2023-09-20T10-05-58.016]	700001	13	AZ DAPI.icsx_[ibrx_2023-09-20T10-05-58.016]	700001	61223 PLA PARP1 HIF1A _d_Norm DMSO Position004 Image 4_[ims1_2023-09-20T10-05-58.016].ims	/Users/mzglab_user/Desktop/esv/pla hif1a parp1 2023/imaris/normoxia/DMSO/61223 PLA PARP1 HIF1A _d_Norm DMSO Position004 Image 4_[ims1_2023-09-20T10-05-58.016].ims
2951		2	Image 1	125	AZ DAPI.icsx_[ibrx_2023-09-20T10-05-58.016]	700001	14	AZ DAPI.icsx_[ibrx_2023-09-20T10-05-58.016]	700001	61223 PLA PARP1 HIF1A _d_Norm DMSO Position004 Image 4_[ims1_2023-09-20T10-05-58.016].ims	/Users/mzglab_user/Desktop/esv/pla hif1a parp1 2023/imaris/normoxia/DMSO/61223 PLA PARP1 HIF1A _d_Norm DMSO Position004 Image 4_[ims1_2023-09-20T10-05-58.016].ims
0		2	Image 1	126	AZ DAPI.icsx_[ibrx_2023-09-20T10-05-58.016]	700001	16	AZ DAPI.icsx_[ibrx_2023-09-20T10-05-58.016]	700001	61223 PLA PARP1 HIF1A _d_Norm DMSO Position004 Image 4_[ims1_2023-09-20T10-05-58.016].ims	/Users/mzglab_user/Desktop/esv/pla hif1a parp1 2023/imaris/normoxia/DMSO/61223 PLA PARP1 HIF1A _d_Norm DMSO Position004 Image 4_[ims1_2023-09-20T10-05-58.016].ims
1130		2	Image 1	127	AZ DAPI.icsx_[ibrx_2023-09-20T10-05-58.016]	700001	4	AZ DAPI.icsx_[ibrx_2023-09-20T10-05-58.016]	700001	61223 PLA PARP1 HIF1A _e_Norm DMSO Position005 Image 5_[ims1_2023-09-20T10-05-58.016].ims	/Users/mzglab_user/Desktop/esv/pla hif1a parp1 2023/imaris/normoxia/DMSO/61223 PLA PARP1 HIF1A _e_Norm DMSO Position005 Image 5_[ims1_2023-09-20T10-05-58.016].ims
0		2	Image 1	128	AZ DAPI.icsx_[ibrx_2023-09-20T10-05-58.016]	700001	5	AZ DAPI.icsx_[ibrx_2023-09-20T10-05-58.016]	700001	61223 PLA PARP1 HIF1A _e_Norm DMSO Position005 Image 5_[ims1_2023-09-20T10-05-58.016].ims	/Users/mzglab_user/Desktop/esv/pla hif1a parp1 2023/imaris/normoxia/DMSO/61223 PLA PARP1 HIF1A _e_Norm DMSO Position005 Image 5_[ims1_2023-09-20T10-05-58.016].ims
0		2	Image 1	129	AZ DAPI.icsx_[ibrx_2023-09-20T10-05-58.016]	700001	6	AZ DAPI.icsx_[ibrx_2023-09-20T10-05-58.016]	700001	61223 PLA PARP1 HIF1A _e_Norm DMSO Position005 Image 5_[ims1_2023-09-20T10-05-58.016].ims	/Users/mzglab_user/Desktop/esv/pla hif1a parp1 2023/imaris/normoxia/DMSO/61223 PLA PARP1 HIF1A _e_Norm DMSO Position005 Image 5_[ims1_2023-09-20T10-05-58.016].ims
59500		2	Image 1	130	AZ DAPI.icsx_[ibrx_2023-09-20T10-05-58.016]	700001	7	AZ DAPI.icsx_[ibrx_2023-09-20T10-05-58.016]	700001	61223 PLA PARP1 HIF1A _e_Norm DMSO Position005 Image 5_[ims1_2023-09-20T10-05-58.016].ims	/Users/mzglab_user/Desktop/esv/pla hif1a parp1 2023/imaris/normoxia/DMSO/61223 PLA PARP1 HIF1A _e_Norm DMSO Position005 Image 5_[ims1_2023-09-20T10-05-58.016].ims
14900		2	Image 1	131	AZ DAPI.icsx_[ibrx_2023-09-20T10-05-58.016]	700001	10	AZ DAPI.icsx_[ibrx_2023-09-20T10-05-58.016]	700001	61223 PLA PARP1 HIF1A _e_Norm DMSO Position005 Image 5_[ims1_2023-09-20T10-05-58.016].ims	/Users/mzglab_user/Desktop/esv/pla hif1a parp1 2023/imaris/normoxia/DMSO/61223 PLA PARP1 HIF1A _e_Norm DMSO Position005 Image 5_[ims1_2023-09-20T10-05-58.016].ims
45400		2	Image 1	132	AZ DAPI.icsx_[ibrx_2023-09-20T10-05-58.016]	700001	12	AZ DAPI.icsx_[ibrx_2023-09-20T10-05-58.016]	700001	61223 PLA PARP1 HIF1A _e_Norm DMSO Position005 Image 5_[ims1_2023-09-20T10-05-58.016].ims	/Users/mzglab_user/Desktop/esv/pla hif1a parp1 2023/imaris/normoxia/DMSO/61223 PLA PARP1 HIF1A _e_Norm DMSO Position005 Image 5_[ims1_2023-09-20T10-05-58.016].ims
0		2	Image 1	133	AZ DAPI.icsx_[ibrx_2023-09-20T10-05-58.016]	700001	14	AZ DAPI.icsx_[ibrx_2023-09-20T10-05-58.016]	700001	61223 PLA PARP1 HIF1A _e_Norm DMSO Position005 Image 5_[ims1_2023-09-20T10-05-58.016].ims	/Users/mzglab_user/Desktop/esv/pla hif1a parp1 2023/imaris/normoxia/DMSO/61223 PLA PARP1 HIF1A _e_Norm DMSO Position005 Image 5_[ims1_2023-09-20T10-05-58.016].ims
5820		2	Image 1	134	AZ DAPI.icsx_[ibrx_2023-09-20T10-05-58.016]	700001	15	AZ DAPI.icsx_[ibrx_2023-09-20T10-05-58.016]	700001	61223 PLA PARP1 HIF1A _e_Norm DMSO Position005 Image 5_[ims1_2023-09-20T10-05-58.016].ims	/Users/mzglab_user/Desktop/esv/pla hif1a parp1 2023/imaris/normoxia/DMSO/61223 PLA PARP1 HIF1A _e_Norm DMSO Position005 Image 5_[ims1_2023-09-20T10-05-58.016].ims
0		2	Image 1	135	AZ DAPI.icsx_[ibrx_2023-09-20T10-05-58.016]	700001	2	AZ DAPI.icsx_[ibrx_2023-09-20T10-05-58.016]	700001	61223 PLA PARP1 HIF1A _f_Norm DMSO Position006 Image 6_[ims1_2023-09-20T10-05-58.016].ims	/Users/mzglab_user/Desktop/esv/pla hif1a parp1 2023/imaris/normoxia/DMSO/61223 PLA PARP1 HIF1A _f_Norm DMSO Position006 Image 6_[ims1_2023-09-20T10-05-58.016].ims
1950		2	Image 1	136	AZ DAPI.icsx_[ibrx_2023-09-20T10-05-58.016]	700001	4	AZ DAPI.icsx_[ibrx_2023-09-20T10-05-58.016]	700001	61223 PLA PARP1 HIF1A _f_Norm DMSO Position006 Image 6_[ims1_2023-09-20T10-05-58.016].ims	/Users/mzglab_user/Desktop/esv/pla hif1a parp1 2023/imaris/normoxia/DMSO/61223 PLA PARP1 HIF1A _f_Norm DMSO Position006 Image 6_[ims1_2023-09-20T10-05-58.016].ims
0		2	Image 1	137	AZ DAPI.icsx_[ibrx_2023-09-20T10-05-58.016]	700001	9	AZ DAPI.icsx_[ibrx_2023-09-20T10-05-58.016]	700001	61223 PLA PARP1 HIF1A _f_Norm DMSO Position006 Image 6_[ims1_2023-09-20T10-05-58.016].ims	/Users/mzglab_user/Desktop/esv/pla hif1a parp1 2023/imaris/normoxia/DMSO/61223 PLA PARP1 HIF1A _f_Norm DMSO Position006 Image 6_[ims1_2023-09-20T10-05-58.016].ims
0		2	Image 1	138	AZ DAPI.icsx_[ibrx_2023-09-20T10-05-58.016]	700001	17	AZ DAPI.icsx_[ibrx_2023-09-20T10-05-58.016]	700001	61223 PLA PARP1 HIF1A _f_Norm DMSO Position006 Image 6_[ims1_2023-09-20T10-05-58.016].ims	/Users/mzglab_user/Desktop/esv/pla hif1a parp1 2023/imaris/normoxia/DMSO/61223 PLA PARP1 HIF1A _f_Norm DMSO Position006 Image 6_[ims1_2023-09-20T10-05-58.016].ims
1575		2	Image 1	139	AZ DAPI.icsx_[ibrx_2023-09-20T10-05-58.016]	700001	19	AZ DAPI.icsx_[ibrx_2023-09-20T10-05-58.016]	700001	61223 PLA PARP1 HIF1A _f_Norm DMSO Position006 Image 6_[ims1_2023-09-20T10-05-58.016].ims	/Users/mzglab_user/Desktop/esv/pla hif1a parp1 2023/imaris/normoxia/DMSO/61223 PLA PARP1 HIF1A _f_Norm DMSO Position006 Image 6_[ims1_2023-09-20T10-05-58.016].ims
139000		2	Image 1	140	AZ DAPI.icsx_[ibrx_2023-09-20T10-05-58.016]	700001	27	AZ DAPI.icsx_[ibrx_2023-09-20T10-05-58.016]	700001	61223 PLA PARP1 HIF1A _f_Norm DMSO Position006 Image 6_[ims1_2023-09-20T10-05-58.016].ims	/Users/mzglab_user/Desktop/esv/pla hif1a parp1 2023/imaris/normoxia/DMSO/61223 PLA PARP1 HIF1A _f_Norm DMSO Position006 Image 6_[ims1_2023-09-20T10-05-58.016].ims
2868		2	Image 1	141	AZ DAPI.icsx_[ibrx_2023-09-20T10-05-58.016]	700001	32	AZ DAPI.icsx_[ibrx_2023-09-20T10-05-58.016]	700001	61223 PLA PARP1 HIF1A _f_Norm DMSO Position006 Image 6_[ims1_2023-09-20T10-05-58.016].ims	/Users/mzglab_user/Desktop/esv/pla hif1a parp1 2023/imaris/normoxia/DMSO/61223 PLA PARP1 HIF1A _f_Norm DMSO Position006 Image 6_[ims1_2023-09-20T10-05-58.016].ims
6502		2	Image 1	142	AZ DAPI.icsx_[ibrx_2023-09-20T10-05-58.016]	700001	34	AZ DAPI.icsx_[ibrx_2023-09-20T10-05-58.016]	700001	61223 PLA PARP1 HIF1A _f_Norm DMSO Position006 Image 6_[ims1_2023-09-20T10-05-58.016].ims	/Users/mzglab_user/Desktop/esv/pla hif1a parp1 2023/imaris/normoxia/DMSO/61223 PLA PARP1 HIF1A _f_Norm DMSO Position006 Image 6_[ims1_2023-09-20T10-05-58.016].ims
191000		2	Image 1	143	AZ DAPI.icsx_[ibrx_2023-09-20T10-05-58.016]	700001	14	AZ DAPI.icsx_[ibrx_2023-09-20T10-05-58.016]	700001	61223 PLA PARP1 HIF1A _g_Norm DMSO Position007 Image 7_[ims1_2023-09-20T10-05-58.016].ims	/Users/mzglab_user/Desktop/esv/pla hif1a parp1 2023/imaris/normoxia/DMSO/61223 PLA PARP1 HIF1A _g_Norm DMSO Position007 Image 7_[ims1_2023-09-20T10-05-58.016].ims
0		2	Image 1	144	AZ DAPI.icsx_[ibrx_2023-09-20T10-05-58.016]	700001	18	AZ DAPI.icsx_[ibrx_2023-09-20T10-05-58.016]	700001	61223 PLA PARP1 HIF1A _g_Norm DMSO Position007 Image 7_[ims1_2023-09-20T10-05-58.016].ims	/Users/mzglab_user/Desktop/esv/pla hif1a parp1 2023/imaris/normoxia/DMSO/61223 PLA PARP1 HIF1A _g_Norm DMSO Position007 Image 7_[ims1_2023-09-20T10-05-58.016].ims
309000		2	Image 1	145	AZ DAPI.icsx_[ibrx_2023-09-20T10-05-58.016]	700001	21	AZ DAPI.icsx_[ibrx_2023-09-20T10-05-58.016]	700001	61223 PLA PARP1 HIF1A _g_Norm DMSO Position007 Image 7_[ims1_2023-09-20T10-05-58.016].ims	/Users/mzglab_user/Desktop/esv/pla hif1a parp1 2023/imaris/normoxia/DMSO/61223 PLA PARP1 HIF1A _g_Norm DMSO Position007 Image 7_[ims1_2023-09-20T10-05-58.016].ims
131000		2	Image 1	146	AZ DAPI.icsx_[ibrx_2023-09-20T10-05-58.016]	700001	26	AZ DAPI.icsx_[ibrx_2023-09-20T10-05-58.016]	700001	61223 PLA PARP1 HIF1A _g_Norm DMSO Position007 Image 7_[ims1_2023-09-20T10-05-58.016].ims	/Users/mzglab_user/Desktop/esv/pla hif1a parp1 2023/imaris/normoxia/DMSO/61223 PLA PARP1 HIF1A _g_Norm DMSO Position007 Image 7_[ims1_2023-09-20T10-05-58.016].ims
385000		2	Image 1	147	AZ DAPI.icsx_[ibrx_2023-09-20T10-05-58.016]	700001	30	AZ DAPI.icsx_[ibrx_2023-09-20T10-05-58.016]	700001	61223 PLA PARP1 HIF1A _g_Norm DMSO Position007 Image 7_[ims1_2023-09-20T10-05-58.016].ims	/Users/mzglab_user/Desktop/esv/pla hif1a parp1 2023/imaris/normoxia/DMSO/61223 PLA PARP1 HIF1A _g_Norm DMSO Position007 Image 7_[ims1_2023-09-20T10-05-58.016].ims
18900		2	Image 1	148	AZ DAPI.icsx_[ibrx_2023-09-20T10-05-58.016]	700001	32	AZ DAPI.icsx_[ibrx_2023-09-20T10-05-58.016]	700001	61223 PLA PARP1 HIF1A _g_Norm DMSO Position007 Image 7_[ims1_2023-09-20T10-05-58.016].ims	/Users/mzglab_user/Desktop/esv/pla hif1a parp1 2023/imaris/normoxia/DMSO/61223 PLA PARP1 HIF1A _g_Norm DMSO Position007 Image 7_[ims1_2023-09-20T10-05-58.016].ims
11900		2	Image 1	149	AZ DAPI.icsx_[ibrx_2023-09-20T10-05-58.016]	700001	37	AZ DAPI.icsx_[ibrx_2023-09-20T10-05-58.016]	700001	61223 PLA PARP1 HIF1A _g_Norm DMSO Position007 Image 7_[ims1_2023-09-20T10-05-58.016].ims	/Users/mzglab_user/Desktop/esv/pla hif1a parp1 2023/imaris/normoxia/DMSO/61223 PLA PARP1 HIF1A _g_Norm DMSO Position007 Image 7_[ims1_2023-09-20T10-05-58.016].ims
344000		2	Image 1	150	AZ DAPI.icsx_[ibrx_2023-09-20T10-05-58.016]	700001	39	AZ DAPI.icsx_[ibrx_2023-09-20T10-05-58.016]	700001	61223 PLA PARP1 HIF1A _g_Norm DMSO Position007 Image 7_[ims1_2023-09-20T10-05-58.016].ims	/Users/mzglab_user/Desktop/esv/pla hif1a parp1 2023/imaris/normoxia/DMSO/61223 PLA PARP1 HIF1A _g_Norm DMSO Position007 Image 7_[ims1_2023-09-20T10-05-58.016].ims
248000		2	Image 1	151	AZ DAPI.icsx_[ibrx_2023-09-20T10-05-58.016]	700001	12	AZ DAPI.icsx_[ibrx_2023-09-20T10-05-58.016]	700001	61223 PLA PARP1 HIF1A _h_Norm DMSO Position008 Image 8_[ims1_2023-09-20T10-05-58.016].ims	/Users/mzglab_user/Desktop/esv/pla hif1a parp1 2023/imaris/normoxia/DMSO/61223 PLA PARP1 HIF1A _h_Norm DMSO Position008 Image 8_[ims1_2023-09-20T10-05-58.016].ims
0		2	Image 1	152	AZ DAPI.icsx_[ibrx_2023-09-20T10-05-58.016]	700001	20	AZ DAPI.icsx_[ibrx_2023-09-20T10-05-58.016]	700001	61223 PLA PARP1 HIF1A _h_Norm DMSO Position008 Image 8_[ims1_2023-09-20T10-05-58.016].ims	/Users/mzglab_user/Desktop/esv/pla hif1a parp1 2023/imaris/normoxia/DMSO/61223 PLA PARP1 HIF1A _h_Norm DMSO Position008 Image 8_[ims1_2023-09-20T10-05-58.016].ims
14800		2	Image 1	153	AZ DAPI.icsx_[ibrx_2023-09-20T10-05-58.016]	700001	27	AZ DAPI.icsx_[ibrx_2023-09-20T10-05-58.016]	700001	61223 PLA PARP1 HIF1A _h_Norm DMSO Position008 Image 8_[ims1_2023-09-20T10-05-58.016].ims	/Users/mzglab_user/Desktop/esv/pla hif1a parp1 2023/imaris/normoxia/DMSO/61223 PLA PARP1 HIF1A _h_Norm DMSO Position008 Image 8_[ims1_2023-09-20T10-05-58.016].ims
19600		2	Image 1	154	AZ DAPI.icsx_[ibrx_2023-09-20T10-05-58.016]	700001	45	AZ DAPI.icsx_[ibrx_2023-09-20T10-05-58.016]	700001	61223 PLA PARP1 HIF1A _h_Norm DMSO Position008 Image 8_[ims1_2023-09-20T10-05-58.016].ims	/Users/mzglab_user/Desktop/esv/pla hif1a parp1 2023/imaris/normoxia/DMSO/61223 PLA PARP1 HIF1A _h_Norm DMSO Position008 Image 8_[ims1_2023-09-20T10-05-58.016].ims
70700		2	Image 1	155	AZ DAPI.icsx_[ibrx_2023-09-20T10-05-58.016]	700001	48	AZ DAPI.icsx_[ibrx_2023-09-20T10-05-58.016]	700001	61223 PLA PARP1 HIF1A _h_Norm DMSO Position008 Image 8_[ims1_2023-09-20T10-05-58.016].ims	/Users/mzglab_user/Desktop/esv/pla hif1a parp1 2023/imaris/normoxia/DMSO/61223 PLA PARP1 HIF1A _h_Norm DMSO Position008 Image 8_[ims1_2023-09-20T10-05-58.016].ims
249000		2	Image 1	156	AZ DAPI.icsx_[ibrx_2023-09-20T10-05-58.016]	700001	49	AZ DAPI.icsx_[ibrx_2023-09-20T10-05-58.016]	700001	61223 PLA PARP1 HIF1A _h_Norm DMSO Position008 Image 8_[ims1_2023-09-20T10-05-58.016].ims	/Users/mzglab_user/Desktop/esv/pla hif1a parp1 2023/imaris/normoxia/DMSO/61223 PLA PARP1 HIF1A _h_Norm DMSO Position008 Image 8_[ims1_2023-09-20T10-05-58.016].ims
84500		2	Image 1	157	AZ DAPI.icsx_[ibrx_2023-09-20T10-05-58.016]	700001	78	AZ DAPI.icsx_[ibrx_2023-09-20T10-05-58.016]	700001	61223 PLA PARP1 HIF1A _h_Norm DMSO Position008 Image 8_[ims1_2023-09-20T10-05-58.016].ims	/Users/mzglab_user/Desktop/esv/pla hif1a parp1 2023/imaris/normoxia/DMSO/61223 PLA PARP1 HIF1A _h_Norm DMSO Position008 Image 8_[ims1_2023-09-20T10-05-58.016].ims
1230000		2	Image 1	158	AZ DAPI.icsx_[ibrx_2023-09-20T10-05-58.016]	700001	97	AZ DAPI.icsx_[ibrx_2023-09-20T10-05-58.016]	700001	61223 PLA PARP1 HIF1A _h_Norm DMSO Position008 Image 8_[ims1_2023-09-20T10-05-58.016].ims	/Users/mzglab_user/Desktop/esv/pla hif1a parp1 2023/imaris/normoxia/DMSO/61223 PLA PARP1 HIF1A _h_Norm DMSO Position008 Image 8_[ims1_2023-09-20T10-05-58.016].ims
3320000		2	Image 1	159	AZ DAPI.icsx_[ibrx_2023-09-20T10-05-58.016]	700001	134	AZ DAPI.icsx_[ibrx_2023-09-20T10-05-58.016]	700001	61223 PLA PARP1 HIF1A _i_Norm DMSO Position009 Image 9_[ims1_2023-09-20T10-05-58.016].ims	/Users/mzglab_user/Desktop/esv/pla hif1a parp1 2023/imaris/normoxia/DMSO/61223 PLA PARP1 HIF1A _i_Norm DMSO Position009 Image 9_[ims1_2023-09-20T10-05-58.016].ims
3200000		2	Image 1	160	AZ DAPI.icsx_[ibrx_2023-09-20T10-05-58.016]	700001	145	AZ DAPI.icsx_[ibrx_2023-09-20T10-05-58.016]	700001	61223 PLA PARP1 HIF1A _i_Norm DMSO Position009 Image 9_[ims1_2023-09-20T10-05-58.016].ims	/Users/mzglab_user/Desktop/esv/pla hif1a parp1 2023/imaris/normoxia/DMSO/61223 PLA PARP1 HIF1A _i_Norm DMSO Position009 Image 9_[ims1_2023-09-20T10-05-58.016].ims
3640000		2	Image 1	161	AZ DAPI.icsx_[ibrx_2023-09-20T10-05-58.016]	700001	174	AZ DAPI.icsx_[ibrx_2023-09-20T10-05-58.016]	700001	61223 PLA PARP1 HIF1A _i_Norm DMSO Position009 Image 9_[ims1_2023-09-20T10-05-58.016].ims	/Users/mzglab_user/Desktop/esv/pla hif1a parp1 2023/imaris/normoxia/DMSO/61223 PLA PARP1 HIF1A _i_Norm DMSO Position009 Image 9_[ims1_2023-09-20T10-05-58.016].ims
1910000		2	Image 1	162	AZ DAPI.icsx_[ibrx_2023-09-20T10-05-58.016]	700001	195	AZ DAPI.icsx_[ibrx_2023-09-20T10-05-58.016]	700001	61223 PLA PARP1 HIF1A _i_Norm DMSO Position009 Image 9_[ims1_2023-09-20T10-05-58.016].ims	/Users/mzglab_user/Desktop/esv/pla hif1a parp1 2023/imaris/normoxia/DMSO/61223 PLA PARP1 HIF1A _i_Norm DMSO Position009 Image 9_[ims1_2023-09-20T10-05-58.016].ims
6320000		2	Image 1	163	AZ DAPI.icsx_[ibrx_2023-09-20T10-05-58.016]	700001	212	AZ DAPI.icsx_[ibrx_2023-09-20T10-05-58.016]	700001	61223 PLA PARP1 HIF1A _i_Norm DMSO Position009 Image 9_[ims1_2023-09-20T10-05-58.016].ims	/Users/mzglab_user/Desktop/esv/pla hif1a parp1 2023/imaris/normoxia/DMSO/61223 PLA PARP1 HIF1A _i_Norm DMSO Position009 Image 9_[ims1_2023-09-20T10-05-58.016].ims
2540000		2	Image 1	164	AZ DAPI.icsx_[ibrx_2023-09-20T10-05-58.016]	700001	226	AZ DAPI.icsx_[ibrx_2023-09-20T10-05-58.016]	700001	61223 PLA PARP1 HIF1A _i_Norm DMSO Position009 Image 9_[ims1_2023-09-20T10-05-58.016].ims	/Users/mzglab_user/Desktop/esv/pla hif1a parp1 2023/imaris/normoxia/DMSO/61223 PLA PARP1 HIF1A _i_Norm DMSO Position009 Image 9_[ims1_2023-09-20T10-05-58.016].ims
2820000		2	Image 1	165	AZ DAPI.icsx_[ibrx_2023-09-20T10-05-58.016]	700001	228	AZ DAPI.icsx_[ibrx_2023-09-20T10-05-58.016]	700001	61223 PLA PARP1 HIF1A _i_Norm DMSO Position009 Image 9_[ims1_2023-09-20T10-05-58.016].ims	/Users/mzglab_user/Desktop/esv/pla hif1a parp1 2023/imaris/normoxia/DMSO/61223 PLA PARP1 HIF1A _i_Norm DMSO Position009 Image 9_[ims1_2023-09-20T10-05-58.016].ims
4000000		2	Image 1	166	AZ DAPI.icsx_[ibrx_2023-09-20T10-05-58.016]	700001	315	AZ DAPI.icsx_[ibrx_2023-09-20T10-05-58.016]	700001	61223 PLA PARP1 HIF1A _i_Norm DMSO Position009 Image 9_[ims1_2023-09-20T10-05-58.016].ims	/Users/mzglab_user/Desktop/esv/pla hif1a parp1 2023/imaris/normoxia/DMSO/61223 PLA PARP1 HIF1A _i_Norm DMSO Position009 Image 9_[ims1_2023-09-20T10-05-58.016].ims
84900		2	Image 1	167	AZ DAPI.icsx_[ibrx_2023-09-20T10-05-58.016]	700001	5	AZ DAPI.icsx_[ibrx_2023-09-20T10-05-58.016]	700001	61223 PLA PARP1 HIF1A _j_Norm DMSO Position010 Image 10_[ims1_2023-09-20T10-05-58.016].ims	/Users/mzglab_user/Desktop/esv/pla hif1a parp1 2023/imaris/normoxia/DMSO/61223 PLA PARP1 HIF1A _j_Norm DMSO Position010 Image 10_[ims1_2023-09-20T10-05-58.016].ims
10600		2	Image 1	168	AZ DAPI.icsx_[ibrx_2023-09-20T10-05-58.016]	700001	7	AZ DAPI.icsx_[ibrx_2023-09-20T10-05-58.016]	700001	61223 PLA PARP1 HIF1A _j_Norm DMSO Position010 Image 10_[ims1_2023-09-20T10-05-58.016].ims	/Users/mzglab_user/Desktop/esv/pla hif1a parp1 2023/imaris/normoxia/DMSO/61223 PLA PARP1 HIF1A _j_Norm DMSO Position010 Image 10_[ims1_2023-09-20T10-05-58.016].ims
33400		2	Image 1	169	AZ DAPI.icsx_[ibrx_2023-09-20T10-05-58.016]	700001	9	AZ DAPI.icsx_[ibrx_2023-09-20T10-05-58.016]	700001	61223 PLA PARP1 HIF1A _j_Norm DMSO Position010 Image 10_[ims1_2023-09-20T10-05-58.016].ims	/Users/mzglab_user/Desktop/esv/pla hif1a parp1 2023/imaris/normoxia/DMSO/61223 PLA PARP1 HIF1A _j_Norm DMSO Position010 Image 10_[ims1_2023-09-20T10-05-58.016].ims
13000		2	Image 1	170	AZ DAPI.icsx_[ibrx_2023-09-20T10-05-58.016]	700001	11	AZ DAPI.icsx_[ibrx_2023-09-20T10-05-58.016]	700001	61223 PLA PARP1 HIF1A _j_Norm DMSO Position010 Image 10_[ims1_2023-09-20T10-05-58.016].ims	/Users/mzglab_user/Desktop/esv/pla hif1a parp1 2023/imaris/normoxia/DMSO/61223 PLA PARP1 HIF1A _j_Norm DMSO Position010 Image 10_[ims1_2023-09-20T10-05-58.016].ims
7281		2	Image 1	171	AZ DAPI.icsx_[ibrx_2023-09-20T10-05-58.016]	700001	16	AZ DAPI.icsx_[ibrx_2023-09-20T10-05-58.016]	700001	61223 PLA PARP1 HIF1A _j_Norm DMSO Position010 Image 10_[ims1_2023-09-20T10-05-58.016].ims	/Users/mzglab_user/Desktop/esv/pla hif1a parp1 2023/imaris/normoxia/DMSO/61223 PLA PARP1 HIF1A _j_Norm DMSO Position010 Image 10_[ims1_2023-09-20T10-05-58.016].ims
201000		2	Image 1	172	AZ DAPI.icsx_[ibrx_2023-09-20T10-05-58.016]	700001	17	AZ DAPI.icsx_[ibrx_2023-09-20T10-05-58.016]	700001	61223 PLA PARP1 HIF1A _j_Norm DMSO Position010 Image 10_[ims1_2023-09-20T10-05-58.016].ims	/Users/mzglab_user/Desktop/esv/pla hif1a parp1 2023/imaris/normoxia/DMSO/61223 PLA PARP1 HIF1A _j_Norm DMSO Position010 Image 10_[ims1_2023-09-20T10-05-58.016].ims
119000		2	Image 1	173	AZ DAPI.icsx_[ibrx_2023-09-20T10-05-58.016]	700001	19	AZ DAPI.icsx_[ibrx_2023-09-20T10-05-58.016]	700001	61223 PLA PARP1 HIF1A _j_Norm DMSO Position010 Image 10_[ims1_2023-09-20T10-05-58.016].ims	/Users/mzglab_user/Desktop/esv/pla hif1a parp1 2023/imaris/normoxia/DMSO/61223 PLA PARP1 HIF1A _j_Norm DMSO Position010 Image 10_[ims1_2023-09-20T10-05-58.016].ims
615000		2	Image 1	174	AZ DAPI.icsx_[ibrx_2023-09-20T10-05-58.016]	700001	22	AZ DAPI.icsx_[ibrx_2023-09-20T10-05-58.016]	700001	61223 PLA PARP1 HIF1A _j_Norm DMSO Position010 Image 10_[ims1_2023-09-20T10-05-58.016].ims	/Users/mzglab_user/Desktop/esv/pla hif1a parp1 2023/imaris/normoxia/DMSO/61223 PLA PARP1 HIF1A _j_Norm DMSO Position010 Image 10_[ims1_2023-09-20T10-05-58.016].ims
55200		2	Image 1	175	AZ DAPI.icsx_[ibrx_2023-09-20T10-05-58.016]	700001	2	AZ DAPI.icsx_[ibrx_2023-09-20T10-05-58.016]	700001	61223 PLA PARP1 HIF1A _k_Norm DMSO Position011 Image 11_[ims1_2023-09-20T10-05-58.016].ims	/Users/mzglab_user/Desktop/esv/pla hif1a parp1 2023/imaris/normoxia/DMSO/61223 PLA PARP1 HIF1A _k_Norm DMSO Position011 Image 11_[ims1_2023-09-20T10-05-58.016].ims
0		2	Image 1	176	AZ DAPI.icsx_[ibrx_2023-09-20T10-05-58.016]	700001	5	AZ DAPI.icsx_[ibrx_2023-09-20T10-05-58.016]	700001	61223 PLA PARP1 HIF1A _k_Norm DMSO Position011 Image 11_[ims1_2023-09-20T10-05-58.016].ims	/Users/mzglab_user/Desktop/esv/pla hif1a parp1 2023/imaris/normoxia/DMSO/61223 PLA PARP1 HIF1A _k_Norm DMSO Position011 Image 11_[ims1_2023-09-20T10-05-58.016].ims
10100		2	Image 1	177	AZ DAPI.icsx_[ibrx_2023-09-20T10-05-58.016]	700001	7	AZ DAPI.icsx_[ibrx_2023-09-20T10-05-58.016]	700001	61223 PLA PARP1 HIF1A _k_Norm DMSO Position011 Image 11_[ims1_2023-09-20T10-05-58.016].ims	/Users/mzglab_user/Desktop/esv/pla hif1a parp1 2023/imaris/normoxia/DMSO/61223 PLA PARP1 HIF1A _k_Norm DMSO Position011 Image 11_[ims1_2023-09-20T10-05-58.016].ims
594		2	Image 1	178	AZ DAPI.icsx_[ibrx_2023-09-20T10-05-58.016]	700001	9	AZ DAPI.icsx_[ibrx_2023-09-20T10-05-58.016]	700001	61223 PLA PARP1 HIF1A _k_Norm DMSO Position011 Image 11_[ims1_2023-09-20T10-05-58.016].ims	/Users/mzglab_user/Desktop/esv/pla hif1a parp1 2023/imaris/normoxia/DMSO/61223 PLA PARP1 HIF1A _k_Norm DMSO Position011 Image 11_[ims1_2023-09-20T10-05-58.016].ims
65500		2	Image 1	179	AZ DAPI.icsx_[ibrx_2023-09-20T10-05-58.016]	700001	10	AZ DAPI.icsx_[ibrx_2023-09-20T10-05-58.016]	700001	61223 PLA PARP1 HIF1A _k_Norm DMSO Position011 Image 11_[ims1_2023-09-20T10-05-58.016].ims	/Users/mzglab_user/Desktop/esv/pla hif1a parp1 2023/imaris/normoxia/DMSO/61223 PLA PARP1 HIF1A _k_Norm DMSO Position011 Image 11_[ims1_2023-09-20T10-05-58.016].ims
0		2	Image 1	180	AZ DAPI.icsx_[ibrx_2023-09-20T10-05-58.016]	700001	11	AZ DAPI.icsx_[ibrx_2023-09-20T10-05-58.016]	700001	61223 PLA PARP1 HIF1A _k_Norm DMSO Position011 Image 11_[ims1_2023-09-20T10-05-58.016].ims	/Users/mzglab_user/Desktop/esv/pla hif1a parp1 2023/imaris/normoxia/DMSO/61223 PLA PARP1 HIF1A _k_Norm DMSO Position011 Image 11_[ims1_2023-09-20T10-05-58.016].ims
74600		2	Image 1	181	AZ DAPI.icsx_[ibrx_2023-09-20T10-05-58.016]	700001	12	AZ DAPI.icsx_[ibrx_2023-09-20T10-05-58.016]	700001	61223 PLA PARP1 HIF1A _k_Norm DMSO Position011 Image 11_[ims1_2023-09-20T10-05-58.016].ims	/Users/mzglab_user/Desktop/esv/pla hif1a parp1 2023/imaris/normoxia/DMSO/61223 PLA PARP1 HIF1A _k_Norm DMSO Position011 Image 11_[ims1_2023-09-20T10-05-58.016].ims
1092		2	Image 1	182	AZ DAPI.icsx_[ibrx_2023-09-20T10-05-58.016]	700001	13	AZ DAPI.icsx_[ibrx_2023-09-20T10-05-58.016]	700001	61223 PLA PARP1 HIF1A _k_Norm DMSO Position011 Image 11_[ims1_2023-09-20T10-05-58.016].ims	/Users/mzglab_user/Desktop/esv/pla hif1a parp1 2023/imaris/normoxia/DMSO/61223 PLA PARP1 HIF1A _k_Norm DMSO Position011 Image 11_[ims1_2023-09-20T10-05-58.016].ims
1641		2	Image 1	183	AZ DAPI.icsx_[ibrx_2023-09-20T10-05-58.016]	700001	8	AZ DAPI.icsx_[ibrx_2023-09-20T10-05-58.016]	700001	61223 PLA PARP1 HIF1A _l_Norm DMSO Position012 Image 12_[ims1_2023-09-20T10-05-58.016].ims	/Users/mzglab_user/Desktop/esv/pla hif1a parp1 2023/imaris/normoxia/DMSO/61223 PLA PARP1 HIF1A _l_Norm DMSO Position012 Image 12_[ims1_2023-09-20T10-05-58.016].ims
150000		2	Image 1	184	AZ DAPI.icsx_[ibrx_2023-09-20T10-05-58.016]	700001	9	AZ DAPI.icsx_[ibrx_2023-09-20T10-05-58.016]	700001	61223 PLA PARP1 HIF1A _l_Norm DMSO Position012 Image 12_[ims1_2023-09-20T10-05-58.016].ims	/Users/mzglab_user/Desktop/esv/pla hif1a parp1 2023/imaris/normoxia/DMSO/61223 PLA PARP1 HIF1A _l_Norm DMSO Position012 Image 12_[ims1_2023-09-20T10-05-58.016].ims
241000		2	Image 1	185	AZ DAPI.icsx_[ibrx_2023-09-20T10-05-58.016]	700001	13	AZ DAPI.icsx_[ibrx_2023-09-20T10-05-58.016]	700001	61223 PLA PARP1 HIF1A _l_Norm DMSO Position012 Image 12_[ims1_2023-09-20T10-05-58.016].ims	/Users/mzglab_user/Desktop/esv/pla hif1a parp1 2023/imaris/normoxia/DMSO/61223 PLA PARP1 HIF1A _l_Norm DMSO Position012 Image 12_[ims1_2023-09-20T10-05-58.016].ims
347000		2	Image 1	186	AZ DAPI.icsx_[ibrx_2023-09-20T10-05-58.016]	700001	16	AZ DAPI.icsx_[ibrx_2023-09-20T10-05-58.016]	700001	61223 PLA PARP1 HIF1A _l_Norm DMSO Position012 Image 12_[ims1_2023-09-20T10-05-58.016].ims	/Users/mzglab_user/Desktop/esv/pla hif1a parp1 2023/imaris/normoxia/DMSO/61223 PLA PARP1 HIF1A _l_Norm DMSO Position012 Image 12_[ims1_2023-09-20T10-05-58.016].ims
156		2	Image 1	187	AZ DAPI.icsx_[ibrx_2023-09-20T10-05-58.016]	700001	20	AZ DAPI.icsx_[ibrx_2023-09-20T10-05-58.016]	700001	61223 PLA PARP1 HIF1A _l_Norm DMSO Position012 Image 12_[ims1_2023-09-20T10-05-58.016].ims	/Users/mzglab_user/Desktop/esv/pla hif1a parp1 2023/imaris/normoxia/DMSO/61223 PLA PARP1 HIF1A _l_Norm DMSO Position012 Image 12_[ims1_2023-09-20T10-05-58.016].ims
0		2	Image 1	188	AZ DAPI.icsx_[ibrx_2023-09-20T10-05-58.016]	700001	21	AZ DAPI.icsx_[ibrx_2023-09-20T10-05-58.016]	700001	61223 PLA PARP1 HIF1A _l_Norm DMSO Position012 Image 12_[ims1_2023-09-20T10-05-58.016].ims	/Users/mzglab_user/Desktop/esv/pla hif1a parp1 2023/imaris/normoxia/DMSO/61223 PLA PARP1 HIF1A _l_Norm DMSO Position012 Image 12_[ims1_2023-09-20T10-05-58.016].ims
16200		2	Image 1	189	AZ DAPI.icsx_[ibrx_2023-09-20T10-05-58.016]	700001	22	AZ DAPI.icsx_[ibrx_2023-09-20T10-05-58.016]	700001	61223 PLA PARP1 HIF1A _l_Norm DMSO Position012 Image 12_[ims1_2023-09-20T10-05-58.016].ims	/Users/mzglab_user/Desktop/esv/pla hif1a parp1 2023/imaris/normoxia/DMSO/61223 PLA PARP1 HIF1A _l_Norm DMSO Position012 Image 12_[ims1_2023-09-20T10-05-58.016].ims
90100		2	Image 1	190	AZ DAPI.icsx_[ibrx_2023-09-20T10-05-58.016]	700001	24	AZ DAPI.icsx_[ibrx_2023-09-20T10-05-58.016]	700001	61223 PLA PARP1 HIF1A _l_Norm DMSO Position012 Image 12_[ims1_2023-09-20T10-05-58.016].ims	/Users/mzglab_user/Desktop/esv/pla hif1a parp1 2023/imaris/normoxia/DMSO/61223 PLA PARP1 HIF1A _l_Norm DMSO Position012 Image 12_[ims1_2023-09-20T10-05-58.016].ims
5780000		2	Image 1	191	AZ DAPI.icsx_[ibrx_2023-09-20T10-05-58.016]	700001	6	AZ DAPI.icsx_[ibrx_2023-09-20T10-05-58.016]	700001	61223 PLA PARP1 HIF1A _m_Norm DMSO Position013 Image 13_[ims1_2023-09-20T10-05-58.016].ims	/Users/mzglab_user/Desktop/esv/pla hif1a parp1 2023/imaris/normoxia/DMSO/61223 PLA PARP1 HIF1A _m_Norm DMSO Position013 Image 13_[ims1_2023-09-20T10-05-58.016].ims
5100000		2	Image 1	192	AZ DAPI.icsx_[ibrx_2023-09-20T10-05-58.016]	700001	12	AZ DAPI.icsx_[ibrx_2023-09-20T10-05-58.016]	700001	61223 PLA PARP1 HIF1A _m_Norm DMSO Position013 Image 13_[ims1_2023-09-20T10-05-58.016].ims	/Users/mzglab_user/Desktop/esv/pla hif1a parp1 2023/imaris/normoxia/DMSO/61223 PLA PARP1 HIF1A _m_Norm DMSO Position013 Image 13_[ims1_2023-09-20T10-05-58.016].ims
2030000		2	Image 1	193	AZ DAPI.icsx_[ibrx_2023-09-20T10-05-58.016]	700001	43	AZ DAPI.icsx_[ibrx_2023-09-20T10-05-58.016]	700001	61223 PLA PARP1 HIF1A _m_Norm DMSO Position013 Image 13_[ims1_2023-09-20T10-05-58.016].ims	/Users/mzglab_user/Desktop/esv/pla hif1a parp1 2023/imaris/normoxia/DMSO/61223 PLA PARP1 HIF1A _m_Norm DMSO Position013 Image 13_[ims1_2023-09-20T10-05-58.016].ims
3100000		2	Image 1	194	AZ DAPI.icsx_[ibrx_2023-09-20T10-05-58.016]	700001	58	AZ DAPI.icsx_[ibrx_2023-09-20T10-05-58.016]	700001	61223 PLA PARP1 HIF1A _m_Norm DMSO Position013 Image 13_[ims1_2023-09-20T10-05-58.016].ims	/Users/mzglab_user/Desktop/esv/pla hif1a parp1 2023/imaris/normoxia/DMSO/61223 PLA PARP1 HIF1A _m_Norm DMSO Position013 Image 13_[ims1_2023-09-20T10-05-58.016].ims
2100000		2	Image 1	195	AZ DAPI.icsx_[ibrx_2023-09-20T10-05-58.016]	700001	71	AZ DAPI.icsx_[ibrx_2023-09-20T10-05-58.016]	700001	61223 PLA PARP1 HIF1A _m_Norm DMSO Position013 Image 13_[ims1_2023-09-20T10-05-58.016].ims	/Users/mzglab_user/Desktop/esv/pla hif1a parp1 2023/imaris/normoxia/DMSO/61223 PLA PARP1 HIF1A _m_Norm DMSO Position013 Image 13_[ims1_2023-09-20T10-05-58.016].ims
6300000		2	Image 1	196	AZ DAPI.icsx_[ibrx_2023-09-20T10-05-58.016]	700001	72	AZ DAPI.icsx_[ibrx_2023-09-20T10-05-58.016]	700001	61223 PLA PARP1 HIF1A _m_Norm DMSO Position013 Image 13_[ims1_2023-09-20T10-05-58.016].ims	/Users/mzglab_user/Desktop/esv/pla hif1a parp1 2023/imaris/normoxia/DMSO/61223 PLA PARP1 HIF1A _m_Norm DMSO Position013 Image 13_[ims1_2023-09-20T10-05-58.016].ims
5530000		2	Image 1	197	AZ DAPI.icsx_[ibrx_2023-09-20T10-05-58.016]	700001	92	AZ DAPI.icsx_[ibrx_2023-09-20T10-05-58.016]	700001	61223 PLA PARP1 HIF1A _m_Norm DMSO Position013 Image 13_[ims1_2023-09-20T10-05-58.016].ims	/Users/mzglab_user/Desktop/esv/pla hif1a parp1 2023/imaris/normoxia/DMSO/61223 PLA PARP1 HIF1A _m_Norm DMSO Position013 Image 13_[ims1_2023-09-20T10-05-58.016].ims
3950000		2	Image 1	198	AZ DAPI.icsx_[ibrx_2023-09-20T10-05-58.016]	700001	109	AZ DAPI.icsx_[ibrx_2023-09-20T10-05-58.016]	700001	61223 PLA PARP1 HIF1A _m_Norm DMSO Position013 Image 13_[ims1_2023-09-20T10-05-58.016].ims	/Users/mzglab_user/Desktop/esv/pla hif1a parp1 2023/imaris/normoxia/DMSO/61223 PLA PARP1 HIF1A _m_Norm DMSO Position013 Image 13_[ims1_2023-09-20T10-05-58.016].ims
367000		2	Image 1	199	AZ DAPI.icsx_[ibrx_2023-09-20T10-05-58.016]	700001	28	AZ DAPI.icsx_[ibrx_2023-09-20T10-05-58.016]	700001	61223 PLA PARP1 HIF1A _n_Norm DMSO Position014 Image 14_[ims1_2023-09-20T10-05-58.016].ims	/Users/mzglab_user/Desktop/esv/pla hif1a parp1 2023/imaris/normoxia/DMSO/61223 PLA PARP1 HIF1A _n_Norm DMSO Position014 Image 14_[ims1_2023-09-20T10-05-58.016].ims
20600		2	Image 1	200	AZ DAPI.icsx_[ibrx_2023-09-20T10-05-58.016]	700001	32	AZ DAPI.icsx_[ibrx_2023-09-20T10-05-58.016]	700001	61223 PLA PARP1 HIF1A _n_Norm DMSO Position014 Image 14_[ims1_2023-09-20T10-05-58.016].ims	/Users/mzglab_user/Desktop/esv/pla hif1a parp1 2023/imaris/normoxia/DMSO/61223 PLA PARP1 HIF1A _n_Norm DMSO Position014 Image 14_[ims1_2023-09-20T10-05-58.016].ims
1070000		2	Image 1	201	AZ DAPI.icsx_[ibrx_2023-09-20T10-05-58.016]	700001	39	AZ DAPI.icsx_[ibrx_2023-09-20T10-05-58.016]	700001	61223 PLA PARP1 HIF1A _n_Norm DMSO Position014 Image 14_[ims1_2023-09-20T10-05-58.016].ims	/Users/mzglab_user/Desktop/esv/pla hif1a parp1 2023/imaris/normoxia/DMSO/61223 PLA PARP1 HIF1A _n_Norm DMSO Position014 Image 14_[ims1_2023-09-20T10-05-58.016].ims
157000		2	Image 1	202	AZ DAPI.icsx_[ibrx_2023-09-20T10-05-58.016]	700001	48	AZ DAPI.icsx_[ibrx_2023-09-20T10-05-58.016]	700001	61223 PLA PARP1 HIF1A _n_Norm DMSO Position014 Image 14_[ims1_2023-09-20T10-05-58.016].ims	/Users/mzglab_user/Desktop/esv/pla hif1a parp1 2023/imaris/normoxia/DMSO/61223 PLA PARP1 HIF1A _n_Norm DMSO Position014 Image 14_[ims1_2023-09-20T10-05-58.016].ims
1600000		2	Image 1	203	AZ DAPI.icsx_[ibrx_2023-09-20T10-05-58.016]	700001	51	AZ DAPI.icsx_[ibrx_2023-09-20T10-05-58.016]	700001	61223 PLA PARP1 HIF1A _n_Norm DMSO Position014 Image 14_[ims1_2023-09-20T10-05-58.016].ims	/Users/mzglab_user/Desktop/esv/pla hif1a parp1 2023/imaris/normoxia/DMSO/61223 PLA PARP1 HIF1A _n_Norm DMSO Position014 Image 14_[ims1_2023-09-20T10-05-58.016].ims
837000		2	Image 1	204	AZ DAPI.icsx_[ibrx_2023-09-20T10-05-58.016]	700001	62	AZ DAPI.icsx_[ibrx_2023-09-20T10-05-58.016]	700001	61223 PLA PARP1 HIF1A _n_Norm DMSO Position014 Image 14_[ims1_2023-09-20T10-05-58.016].ims	/Users/mzglab_user/Desktop/esv/pla hif1a parp1 2023/imaris/normoxia/DMSO/61223 PLA PARP1 HIF1A _n_Norm DMSO Position014 Image 14_[ims1_2023-09-20T10-05-58.016].ims
130		2	Image 1	205	AZ DAPI.icsx_[ibrx_2023-09-20T10-05-58.016]	700001	71	AZ DAPI.icsx_[ibrx_2023-09-20T10-05-58.016]	700001	61223 PLA PARP1 HIF1A _n_Norm DMSO Position014 Image 14_[ims1_2023-09-20T10-05-58.016].ims	/Users/mzglab_user/Desktop/esv/pla hif1a parp1 2023/imaris/normoxia/DMSO/61223 PLA PARP1 HIF1A _n_Norm DMSO Position014 Image 14_[ims1_2023-09-20T10-05-58.016].ims
731000		2	Image 1	206	AZ DAPI.icsx_[ibrx_2023-09-20T10-05-58.016]	700001	91	AZ DAPI.icsx_[ibrx_2023-09-20T10-05-58.016]	700001	61223 PLA PARP1 HIF1A _n_Norm DMSO Position014 Image 14_[ims1_2023-09-20T10-05-58.016].ims	/Users/mzglab_user/Desktop/esv/pla hif1a parp1 2023/imaris/normoxia/DMSO/61223 PLA PARP1 HIF1A _n_Norm DMSO Position014 Image 14_[ims1_2023-09-20T10-05-58.016].ims
0		2	Image 1	207	AZ DAPI.icsx_[ibrx_2023-09-20T10-05-58.016]	700001	0	AZ DAPI.icsx_[ibrx_2023-09-20T10-05-58.016]	700001	61223 PLA PARP1 HIF1A _o_Norm DMSO Position015 Image 15_[ims1_2023-09-20T10-05-58.016].ims	/Users/mzglab_user/Desktop/esv/pla hif1a parp1 2023/imaris/normoxia/DMSO/61223 PLA PARP1 HIF1A _o_Norm DMSO Position015 Image 15_[ims1_2023-09-20T10-05-58.016].ims
31700		2	Image 1	208	AZ DAPI.icsx_[ibrx_2023-09-20T10-05-58.016]	700001	1	AZ DAPI.icsx_[ibrx_2023-09-20T10-05-58.016]	700001	61223 PLA PARP1 HIF1A _o_Norm DMSO Position015 Image 15_[ims1_2023-09-20T10-05-58.016].ims	/Users/mzglab_user/Desktop/esv/pla hif1a parp1 2023/imaris/normoxia/DMSO/61223 PLA PARP1 HIF1A _o_Norm DMSO Position015 Image 15_[ims1_2023-09-20T10-05-58.016].ims
0		2	Image 1	209	AZ DAPI.icsx_[ibrx_2023-09-20T10-05-58.016]	700001	2	AZ DAPI.icsx_[ibrx_2023-09-20T10-05-58.016]	700001	61223 PLA PARP1 HIF1A _o_Norm DMSO Position015 Image 15_[ims1_2023-09-20T10-05-58.016].ims	/Users/mzglab_user/Desktop/esv/pla hif1a parp1 2023/imaris/normoxia/DMSO/61223 PLA PARP1 HIF1A _o_Norm DMSO Position015 Image 15_[ims1_2023-09-20T10-05-58.016].ims
122000		2	Image 1	210	AZ DAPI.icsx_[ibrx_2023-09-20T10-05-58.016]	700001	5	AZ DAPI.icsx_[ibrx_2023-09-20T10-05-58.016]	700001	61223 PLA PARP1 HIF1A _o_Norm DMSO Position015 Image 15_[ims1_2023-09-20T10-05-58.016].ims	/Users/mzglab_user/Desktop/esv/pla hif1a parp1 2023/imaris/normoxia/DMSO/61223 PLA PARP1 HIF1A _o_Norm DMSO Position015 Image 15_[ims1_2023-09-20T10-05-58.016].ims
2951		2	Image 1	211	AZ DAPI.icsx_[ibrx_2023-09-20T10-05-58.016]	700001	6	AZ DAPI.icsx_[ibrx_2023-09-20T10-05-58.016]	700001	61223 PLA PARP1 HIF1A _o_Norm DMSO Position015 Image 15_[ims1_2023-09-20T10-05-58.016].ims	/Users/mzglab_user/Desktop/esv/pla hif1a parp1 2023/imaris/normoxia/DMSO/61223 PLA PARP1 HIF1A _o_Norm DMSO Position015 Image 15_[ims1_2023-09-20T10-05-58.016].ims
315000		2	Image 1	212	AZ DAPI.icsx_[ibrx_2023-09-20T10-05-58.016]	700001	7	AZ DAPI.icsx_[ibrx_2023-09-20T10-05-58.016]	700001	61223 PLA PARP1 HIF1A _o_Norm DMSO Position015 Image 15_[ims1_2023-09-20T10-05-58.016].ims	/Users/mzglab_user/Desktop/esv/pla hif1a parp1 2023/imaris/normoxia/DMSO/61223 PLA PARP1 HIF1A _o_Norm DMSO Position015 Image 15_[ims1_2023-09-20T10-05-58.016].ims
104000		2	Image 1	213	AZ DAPI.icsx_[ibrx_2023-09-20T10-05-58.016]	700001	12	AZ DAPI.icsx_[ibrx_2023-09-20T10-05-58.016]	700001	61223 PLA PARP1 HIF1A _o_Norm DMSO Position015 Image 15_[ims1_2023-09-20T10-05-58.016].ims	/Users/mzglab_user/Desktop/esv/pla hif1a parp1 2023/imaris/normoxia/DMSO/61223 PLA PARP1 HIF1A _o_Norm DMSO Position015 Image 15_[ims1_2023-09-20T10-05-58.016].ims
6929		2	Image 1	214	AZ DAPI.icsx_[ibrx_2023-09-20T10-05-58.016]	700001	13	AZ DAPI.icsx_[ibrx_2023-09-20T10-05-58.016]	700001	61223 PLA PARP1 HIF1A _o_Norm DMSO Position015 Image 15_[ims1_2023-09-20T10-05-58.016].ims	/Users/mzglab_user/Desktop/esv/pla hif1a parp1 2023/imaris/normoxia/DMSO/61223 PLA PARP1 HIF1A _o_Norm DMSO Position015 Image 15_[ims1_2023-09-20T10-05-58.016].ims
713		2	Image 1	215	AZ DAPI.icsx_[ibrx_2023-09-20T10-05-58.016]	700001	1	AZ DAPI.icsx_[ibrx_2023-09-20T10-05-58.016]	700001	61223 PLA PARP1 HIF1A _p_Norm DMSO Position016 Image 16_[ims1_2023-09-20T10-05-58.016].ims	/Users/mzglab_user/Desktop/esv/pla hif1a parp1 2023/imaris/normoxia/DMSO/61223 PLA PARP1 HIF1A _p_Norm DMSO Position016 Image 16_[ims1_2023-09-20T10-05-58.016].ims
266		2	Image 1	216	AZ DAPI.icsx_[ibrx_2023-09-20T10-05-58.016]	700001	2	AZ DAPI.icsx_[ibrx_2023-09-20T10-05-58.016]	700001	61223 PLA PARP1 HIF1A _p_Norm DMSO Position016 Image 16_[ims1_2023-09-20T10-05-58.016].ims	/Users/mzglab_user/Desktop/esv/pla hif1a parp1 2023/imaris/normoxia/DMSO/61223 PLA PARP1 HIF1A _p_Norm DMSO Position016 Image 16_[ims1_2023-09-20T10-05-58.016].ims
420000		2	Image 1	217	AZ DAPI.icsx_[ibrx_2023-09-20T10-05-58.016]	700001	3	AZ DAPI.icsx_[ibrx_2023-09-20T10-05-58.016]	700001	61223 PLA PARP1 HIF1A _p_Norm DMSO Position016 Image 16_[ims1_2023-09-20T10-05-58.016].ims	/Users/mzglab_user/Desktop/esv/pla hif1a parp1 2023/imaris/normoxia/DMSO/61223 PLA PARP1 HIF1A _p_Norm DMSO Position016 Image 16_[ims1_2023-09-20T10-05-58.016].ims
140		2	Image 1	218	AZ DAPI.icsx_[ibrx_2023-09-20T10-05-58.016]	700001	4	AZ DAPI.icsx_[ibrx_2023-09-20T10-05-58.016]	700001	61223 PLA PARP1 HIF1A _p_Norm DMSO Position016 Image 16_[ims1_2023-09-20T10-05-58.016].ims	/Users/mzglab_user/Desktop/esv/pla hif1a parp1 2023/imaris/normoxia/DMSO/61223 PLA PARP1 HIF1A _p_Norm DMSO Position016 Image 16_[ims1_2023-09-20T10-05-58.016].ims
38000		2	Image 1	219	AZ DAPI.icsx_[ibrx_2023-09-20T10-05-58.016]	700001	5	AZ DAPI.icsx_[ibrx_2023-09-20T10-05-58.016]	700001	61223 PLA PARP1 HIF1A _p_Norm DMSO Position016 Image 16_[ims1_2023-09-20T10-05-58.016].ims	/Users/mzglab_user/Desktop/esv/pla hif1a parp1 2023/imaris/normoxia/DMSO/61223 PLA PARP1 HIF1A _p_Norm DMSO Position016 Image 16_[ims1_2023-09-20T10-05-58.016].ims
6260		2	Image 1	220	AZ DAPI.icsx_[ibrx_2023-09-20T10-05-58.016]	700001	7	AZ DAPI.icsx_[ibrx_2023-09-20T10-05-58.016]	700001	61223 PLA PARP1 HIF1A _p_Norm DMSO Position016 Image 16_[ims1_2023-09-20T10-05-58.016].ims	/Users/mzglab_user/Desktop/esv/pla hif1a parp1 2023/imaris/normoxia/DMSO/61223 PLA PARP1 HIF1A _p_Norm DMSO Position016 Image 16_[ims1_2023-09-20T10-05-58.016].ims
152000		2	Image 1	221	AZ DAPI.icsx_[ibrx_2023-09-20T10-05-58.016]	700001	8	AZ DAPI.icsx_[ibrx_2023-09-20T10-05-58.016]	700001	61223 PLA PARP1 HIF1A _p_Norm DMSO Position016 Image 16_[ims1_2023-09-20T10-05-58.016].ims	/Users/mzglab_user/Desktop/esv/pla hif1a parp1 2023/imaris/normoxia/DMSO/61223 PLA PARP1 HIF1A _p_Norm DMSO Position016 Image 16_[ims1_2023-09-20T10-05-58.016].ims
158000		2	Image 1	222	AZ DAPI.icsx_[ibrx_2023-09-20T10-05-58.016]	700001	10	AZ DAPI.icsx_[ibrx_2023-09-20T10-05-58.016]	700001	61223 PLA PARP1 HIF1A _p_Norm DMSO Position016 Image 16_[ims1_2023-09-20T10-05-58.016].ims	/Users/mzglab_user/Desktop/esv/pla hif1a parp1 2023/imaris/normoxia/DMSO/61223 PLA PARP1 HIF1A _p_Norm DMSO Position016 Image 16_[ims1_2023-09-20T10-05-58.016].ims
