# Supplementary material for: HIF1A-mediated pathways promote euploid cell survival in chromosomally mosaic embryos
Source: eLife. 2025 Oct 14;13:RP101912. doi: 10.7554/eLife.101912 (PMC12520657; doi:10.7554/eLife.101912)
Supplement: Figure 3—source data 3. [file elife-101912-fig3-data3.xls]

## Sheet: Scatter Plot 1D
Scatter Plot 1D
Intensity Sum Ch=2 Img=1	Unit	Channel	Image	ID	Surpass Object	Surpass Object Data ID	Original ID	Original Component Name	Original Component ID	Original Image Name	Original Image ID
3310000		2	Image 1	5	AZ DAPI.icsx_[ibrx_2023-09-20T09-58-56.870]	700001	5	AZ DAPI.icsx_[ibrx_2023-09-20T09-58-56.870]	700001	61223 PLA PARP1 HIF1A _ad_Norm AZ Position001 Image 30_[ims1_2023-09-20T09-58-56.870].ims	/Users/mzglab_user/Desktop/esv/pla hif1a parp1 2023/imaris/normoxia/az3146/61223 PLA PARP1 HIF1A _ad_Norm AZ Position001 Image 30_[ims1_2023-09-20T09-58-56.870].ims
2050000		2	Image 1	13	AZ DAPI.icsx_[ibrx_2023-09-20T09-58-56.870]	700001	13	AZ DAPI.icsx_[ibrx_2023-09-20T09-58-56.870]	700001	61223 PLA PARP1 HIF1A _ad_Norm AZ Position001 Image 30_[ims1_2023-09-20T09-58-56.870].ims	/Users/mzglab_user/Desktop/esv/pla hif1a parp1 2023/imaris/normoxia/az3146/61223 PLA PARP1 HIF1A _ad_Norm AZ Position001 Image 30_[ims1_2023-09-20T09-58-56.870].ims
4820000		2	Image 1	39	AZ DAPI.icsx_[ibrx_2023-09-20T09-58-56.870]	700001	39	AZ DAPI.icsx_[ibrx_2023-09-20T09-58-56.870]	700001	61223 PLA PARP1 HIF1A _ad_Norm AZ Position001 Image 30_[ims1_2023-09-20T09-58-56.870].ims	/Users/mzglab_user/Desktop/esv/pla hif1a parp1 2023/imaris/normoxia/az3146/61223 PLA PARP1 HIF1A _ad_Norm AZ Position001 Image 30_[ims1_2023-09-20T09-58-56.870].ims
1680000		2	Image 1	45	AZ DAPI.icsx_[ibrx_2023-09-20T09-58-56.870]	700001	45	AZ DAPI.icsx_[ibrx_2023-09-20T09-58-56.870]	700001	61223 PLA PARP1 HIF1A _ad_Norm AZ Position001 Image 30_[ims1_2023-09-20T09-58-56.870].ims	/Users/mzglab_user/Desktop/esv/pla hif1a parp1 2023/imaris/normoxia/az3146/61223 PLA PARP1 HIF1A _ad_Norm AZ Position001 Image 30_[ims1_2023-09-20T09-58-56.870].ims
4140000		2	Image 1	59	AZ DAPI.icsx_[ibrx_2023-09-20T09-58-56.870]	700001	59	AZ DAPI.icsx_[ibrx_2023-09-20T09-58-56.870]	700001	61223 PLA PARP1 HIF1A _ad_Norm AZ Position001 Image 30_[ims1_2023-09-20T09-58-56.870].ims	/Users/mzglab_user/Desktop/esv/pla hif1a parp1 2023/imaris/normoxia/az3146/61223 PLA PARP1 HIF1A _ad_Norm AZ Position001 Image 30_[ims1_2023-09-20T09-58-56.870].ims
3540000		2	Image 1	67	AZ DAPI.icsx_[ibrx_2023-09-20T09-58-56.870]	700001	67	AZ DAPI.icsx_[ibrx_2023-09-20T09-58-56.870]	700001	61223 PLA PARP1 HIF1A _ad_Norm AZ Position001 Image 30_[ims1_2023-09-20T09-58-56.870].ims	/Users/mzglab_user/Desktop/esv/pla hif1a parp1 2023/imaris/normoxia/az3146/61223 PLA PARP1 HIF1A _ad_Norm AZ Position001 Image 30_[ims1_2023-09-20T09-58-56.870].ims
6520000		2	Image 1	77	AZ DAPI.icsx_[ibrx_2023-09-20T09-58-56.870]	700001	77	AZ DAPI.icsx_[ibrx_2023-09-20T09-58-56.870]	700001	61223 PLA PARP1 HIF1A _ad_Norm AZ Position001 Image 30_[ims1_2023-09-20T09-58-56.870].ims	/Users/mzglab_user/Desktop/esv/pla hif1a parp1 2023/imaris/normoxia/az3146/61223 PLA PARP1 HIF1A _ad_Norm AZ Position001 Image 30_[ims1_2023-09-20T09-58-56.870].ims
9690000		2	Image 1	100	AZ DAPI.icsx_[ibrx_2023-09-20T09-58-56.870]	700001	100	AZ DAPI.icsx_[ibrx_2023-09-20T09-58-56.870]	700001	61223 PLA PARP1 HIF1A _ad_Norm AZ Position001 Image 30_[ims1_2023-09-20T09-58-56.870].ims	/Users/mzglab_user/Desktop/esv/pla hif1a parp1 2023/imaris/normoxia/az3146/61223 PLA PARP1 HIF1A _ad_Norm AZ Position001 Image 30_[ims1_2023-09-20T09-58-56.870].ims
2390000		2	Image 1	101	AZ DAPI.icsx_[ibrx_2023-09-20T09-58-56.870]	700001	13	AZ DAPI.icsx_[ibrx_2023-09-20T09-58-56.870]	700001	61223 PLA PARP1 HIF1A _ae_Norm AZ Position002 Image 31_[ims1_2023-09-20T09-58-56.870].ims	/Users/mzglab_user/Desktop/esv/pla hif1a parp1 2023/imaris/normoxia/az3146/61223 PLA PARP1 HIF1A _ae_Norm AZ Position002 Image 31_[ims1_2023-09-20T09-58-56.870].ims
1600000		2	Image 1	102	AZ DAPI.icsx_[ibrx_2023-09-20T09-58-56.870]	700001	14	AZ DAPI.icsx_[ibrx_2023-09-20T09-58-56.870]	700001	61223 PLA PARP1 HIF1A _ae_Norm AZ Position002 Image 31_[ims1_2023-09-20T09-58-56.870].ims	/Users/mzglab_user/Desktop/esv/pla hif1a parp1 2023/imaris/normoxia/az3146/61223 PLA PARP1 HIF1A _ae_Norm AZ Position002 Image 31_[ims1_2023-09-20T09-58-56.870].ims
3440000		2	Image 1	103	AZ DAPI.icsx_[ibrx_2023-09-20T09-58-56.870]	700001	19	AZ DAPI.icsx_[ibrx_2023-09-20T09-58-56.870]	700001	61223 PLA PARP1 HIF1A _ae_Norm AZ Position002 Image 31_[ims1_2023-09-20T09-58-56.870].ims	/Users/mzglab_user/Desktop/esv/pla hif1a parp1 2023/imaris/normoxia/az3146/61223 PLA PARP1 HIF1A _ae_Norm AZ Position002 Image 31_[ims1_2023-09-20T09-58-56.870].ims
5390000		2	Image 1	104	AZ DAPI.icsx_[ibrx_2023-09-20T09-58-56.870]	700001	25	AZ DAPI.icsx_[ibrx_2023-09-20T09-58-56.870]	700001	61223 PLA PARP1 HIF1A _ae_Norm AZ Position002 Image 31_[ims1_2023-09-20T09-58-56.870].ims	/Users/mzglab_user/Desktop/esv/pla hif1a parp1 2023/imaris/normoxia/az3146/61223 PLA PARP1 HIF1A _ae_Norm AZ Position002 Image 31_[ims1_2023-09-20T09-58-56.870].ims
1760000		2	Image 1	105	AZ DAPI.icsx_[ibrx_2023-09-20T09-58-56.870]	700001	29	AZ DAPI.icsx_[ibrx_2023-09-20T09-58-56.870]	700001	61223 PLA PARP1 HIF1A _ae_Norm AZ Position002 Image 31_[ims1_2023-09-20T09-58-56.870].ims	/Users/mzglab_user/Desktop/esv/pla hif1a parp1 2023/imaris/normoxia/az3146/61223 PLA PARP1 HIF1A _ae_Norm AZ Position002 Image 31_[ims1_2023-09-20T09-58-56.870].ims
3370000		2	Image 1	106	AZ DAPI.icsx_[ibrx_2023-09-20T09-58-56.870]	700001	37	AZ DAPI.icsx_[ibrx_2023-09-20T09-58-56.870]	700001	61223 PLA PARP1 HIF1A _ae_Norm AZ Position002 Image 31_[ims1_2023-09-20T09-58-56.870].ims	/Users/mzglab_user/Desktop/esv/pla hif1a parp1 2023/imaris/normoxia/az3146/61223 PLA PARP1 HIF1A _ae_Norm AZ Position002 Image 31_[ims1_2023-09-20T09-58-56.870].ims
1230000		2	Image 1	107	AZ DAPI.icsx_[ibrx_2023-09-20T09-58-56.870]	700001	43	AZ DAPI.icsx_[ibrx_2023-09-20T09-58-56.870]	700001	61223 PLA PARP1 HIF1A _ae_Norm AZ Position002 Image 31_[ims1_2023-09-20T09-58-56.870].ims	/Users/mzglab_user/Desktop/esv/pla hif1a parp1 2023/imaris/normoxia/az3146/61223 PLA PARP1 HIF1A _ae_Norm AZ Position002 Image 31_[ims1_2023-09-20T09-58-56.870].ims
3650000		2	Image 1	108	AZ DAPI.icsx_[ibrx_2023-09-20T09-58-56.870]	700001	47	AZ DAPI.icsx_[ibrx_2023-09-20T09-58-56.870]	700001	61223 PLA PARP1 HIF1A _ae_Norm AZ Position002 Image 31_[ims1_2023-09-20T09-58-56.870].ims	/Users/mzglab_user/Desktop/esv/pla hif1a parp1 2023/imaris/normoxia/az3146/61223 PLA PARP1 HIF1A _ae_Norm AZ Position002 Image 31_[ims1_2023-09-20T09-58-56.870].ims
2050000		2	Image 1	109	AZ DAPI.icsx_[ibrx_2023-09-20T09-58-56.870]	700001	1	AZ DAPI.icsx_[ibrx_2023-09-20T09-58-56.870]	700001	61223 PLA PARP1 HIF1A _af_Norm AZ Position003 Image 32_[ims1_2023-09-20T09-58-56.870].ims	/Users/mzglab_user/Desktop/esv/pla hif1a parp1 2023/imaris/normoxia/az3146/61223 PLA PARP1 HIF1A _af_Norm AZ Position003 Image 32_[ims1_2023-09-20T09-58-56.870].ims
1350000		2	Image 1	110	AZ DAPI.icsx_[ibrx_2023-09-20T09-58-56.870]	700001	17	AZ DAPI.icsx_[ibrx_2023-09-20T09-58-56.870]	700001	61223 PLA PARP1 HIF1A _af_Norm AZ Position003 Image 32_[ims1_2023-09-20T09-58-56.870].ims	/Users/mzglab_user/Desktop/esv/pla hif1a parp1 2023/imaris/normoxia/az3146/61223 PLA PARP1 HIF1A _af_Norm AZ Position003 Image 32_[ims1_2023-09-20T09-58-56.870].ims
2030000		2	Image 1	111	AZ DAPI.icsx_[ibrx_2023-09-20T09-58-56.870]	700001	22	AZ DAPI.icsx_[ibrx_2023-09-20T09-58-56.870]	700001	61223 PLA PARP1 HIF1A _af_Norm AZ Position003 Image 32_[ims1_2023-09-20T09-58-56.870].ims	/Users/mzglab_user/Desktop/esv/pla hif1a parp1 2023/imaris/normoxia/az3146/61223 PLA PARP1 HIF1A _af_Norm AZ Position003 Image 32_[ims1_2023-09-20T09-58-56.870].ims
1800000		2	Image 1	112	AZ DAPI.icsx_[ibrx_2023-09-20T09-58-56.870]	700001	27	AZ DAPI.icsx_[ibrx_2023-09-20T09-58-56.870]	700001	61223 PLA PARP1 HIF1A _af_Norm AZ Position003 Image 32_[ims1_2023-09-20T09-58-56.870].ims	/Users/mzglab_user/Desktop/esv/pla hif1a parp1 2023/imaris/normoxia/az3146/61223 PLA PARP1 HIF1A _af_Norm AZ Position003 Image 32_[ims1_2023-09-20T09-58-56.870].ims
1820000		2	Image 1	113	AZ DAPI.icsx_[ibrx_2023-09-20T09-58-56.870]	700001	29	AZ DAPI.icsx_[ibrx_2023-09-20T09-58-56.870]	700001	61223 PLA PARP1 HIF1A _af_Norm AZ Position003 Image 32_[ims1_2023-09-20T09-58-56.870].ims	/Users/mzglab_user/Desktop/esv/pla hif1a parp1 2023/imaris/normoxia/az3146/61223 PLA PARP1 HIF1A _af_Norm AZ Position003 Image 32_[ims1_2023-09-20T09-58-56.870].ims
878000		2	Image 1	114	AZ DAPI.icsx_[ibrx_2023-09-20T09-58-56.870]	700001	43	AZ DAPI.icsx_[ibrx_2023-09-20T09-58-56.870]	700001	61223 PLA PARP1 HIF1A _af_Norm AZ Position003 Image 32_[ims1_2023-09-20T09-58-56.870].ims	/Users/mzglab_user/Desktop/esv/pla hif1a parp1 2023/imaris/normoxia/az3146/61223 PLA PARP1 HIF1A _af_Norm AZ Position003 Image 32_[ims1_2023-09-20T09-58-56.870].ims
1800000		2	Image 1	115	AZ DAPI.icsx_[ibrx_2023-09-20T09-58-56.870]	700001	49	AZ DAPI.icsx_[ibrx_2023-09-20T09-58-56.870]	700001	61223 PLA PARP1 HIF1A _af_Norm AZ Position003 Image 32_[ims1_2023-09-20T09-58-56.870].ims	/Users/mzglab_user/Desktop/esv/pla hif1a parp1 2023/imaris/normoxia/az3146/61223 PLA PARP1 HIF1A _af_Norm AZ Position003 Image 32_[ims1_2023-09-20T09-58-56.870].ims
1670000		2	Image 1	116	AZ DAPI.icsx_[ibrx_2023-09-20T09-58-56.870]	700001	53	AZ DAPI.icsx_[ibrx_2023-09-20T09-58-56.870]	700001	61223 PLA PARP1 HIF1A _af_Norm AZ Position003 Image 32_[ims1_2023-09-20T09-58-56.870].ims	/Users/mzglab_user/Desktop/esv/pla hif1a parp1 2023/imaris/normoxia/az3146/61223 PLA PARP1 HIF1A _af_Norm AZ Position003 Image 32_[ims1_2023-09-20T09-58-56.870].ims
1760000		2	Image 1	117	AZ DAPI.icsx_[ibrx_2023-09-20T09-58-56.870]	700001	3	AZ DAPI.icsx_[ibrx_2023-09-20T09-58-56.870]	700001	61223 PLA PARP1 HIF1A _ag_Norm AZ Position005 Image 33_[ims1_2023-09-20T09-58-56.870].ims	/Users/mzglab_user/Desktop/esv/pla hif1a parp1 2023/imaris/normoxia/az3146/61223 PLA PARP1 HIF1A _ag_Norm AZ Position005 Image 33_[ims1_2023-09-20T09-58-56.870].ims
2190000		2	Image 1	118	AZ DAPI.icsx_[ibrx_2023-09-20T09-58-56.870]	700001	5	AZ DAPI.icsx_[ibrx_2023-09-20T09-58-56.870]	700001	61223 PLA PARP1 HIF1A _ag_Norm AZ Position005 Image 33_[ims1_2023-09-20T09-58-56.870].ims	/Users/mzglab_user/Desktop/esv/pla hif1a parp1 2023/imaris/normoxia/az3146/61223 PLA PARP1 HIF1A _ag_Norm AZ Position005 Image 33_[ims1_2023-09-20T09-58-56.870].ims
2260000		2	Image 1	119	AZ DAPI.icsx_[ibrx_2023-09-20T09-58-56.870]	700001	6	AZ DAPI.icsx_[ibrx_2023-09-20T09-58-56.870]	700001	61223 PLA PARP1 HIF1A _ag_Norm AZ Position005 Image 33_[ims1_2023-09-20T09-58-56.870].ims	/Users/mzglab_user/Desktop/esv/pla hif1a parp1 2023/imaris/normoxia/az3146/61223 PLA PARP1 HIF1A _ag_Norm AZ Position005 Image 33_[ims1_2023-09-20T09-58-56.870].ims
1860000		2	Image 1	120	AZ DAPI.icsx_[ibrx_2023-09-20T09-58-56.870]	700001	11	AZ DAPI.icsx_[ibrx_2023-09-20T09-58-56.870]	700001	61223 PLA PARP1 HIF1A _ag_Norm AZ Position005 Image 33_[ims1_2023-09-20T09-58-56.870].ims	/Users/mzglab_user/Desktop/esv/pla hif1a parp1 2023/imaris/normoxia/az3146/61223 PLA PARP1 HIF1A _ag_Norm AZ Position005 Image 33_[ims1_2023-09-20T09-58-56.870].ims
2900000		2	Image 1	121	AZ DAPI.icsx_[ibrx_2023-09-20T09-58-56.870]	700001	12	AZ DAPI.icsx_[ibrx_2023-09-20T09-58-56.870]	700001	61223 PLA PARP1 HIF1A _ag_Norm AZ Position005 Image 33_[ims1_2023-09-20T09-58-56.870].ims	/Users/mzglab_user/Desktop/esv/pla hif1a parp1 2023/imaris/normoxia/az3146/61223 PLA PARP1 HIF1A _ag_Norm AZ Position005 Image 33_[ims1_2023-09-20T09-58-56.870].ims
1260000		2	Image 1	122	AZ DAPI.icsx_[ibrx_2023-09-20T09-58-56.870]	700001	18	AZ DAPI.icsx_[ibrx_2023-09-20T09-58-56.870]	700001	61223 PLA PARP1 HIF1A _ag_Norm AZ Position005 Image 33_[ims1_2023-09-20T09-58-56.870].ims	/Users/mzglab_user/Desktop/esv/pla hif1a parp1 2023/imaris/normoxia/az3146/61223 PLA PARP1 HIF1A _ag_Norm AZ Position005 Image 33_[ims1_2023-09-20T09-58-56.870].ims
3550000		2	Image 1	123	AZ DAPI.icsx_[ibrx_2023-09-20T09-58-56.870]	700001	24	AZ DAPI.icsx_[ibrx_2023-09-20T09-58-56.870]	700001	61223 PLA PARP1 HIF1A _ag_Norm AZ Position005 Image 33_[ims1_2023-09-20T09-58-56.870].ims	/Users/mzglab_user/Desktop/esv/pla hif1a parp1 2023/imaris/normoxia/az3146/61223 PLA PARP1 HIF1A _ag_Norm AZ Position005 Image 33_[ims1_2023-09-20T09-58-56.870].ims
5280000		2	Image 1	124	AZ DAPI.icsx_[ibrx_2023-09-20T09-58-56.870]	700001	27	AZ DAPI.icsx_[ibrx_2023-09-20T09-58-56.870]	700001	61223 PLA PARP1 HIF1A _ag_Norm AZ Position005 Image 33_[ims1_2023-09-20T09-58-56.870].ims	/Users/mzglab_user/Desktop/esv/pla hif1a parp1 2023/imaris/normoxia/az3146/61223 PLA PARP1 HIF1A _ag_Norm AZ Position005 Image 33_[ims1_2023-09-20T09-58-56.870].ims
887000		2	Image 1	125	AZ DAPI.icsx_[ibrx_2023-09-20T09-58-56.870]	700001	29	AZ DAPI.icsx_[ibrx_2023-09-20T09-58-56.870]	700001	61223 PLA PARP1 HIF1A _ah_Norm AZ Position006 Image 34_[ims1_2023-09-20T09-58-56.870].ims	/Users/mzglab_user/Desktop/esv/pla hif1a parp1 2023/imaris/normoxia/az3146/61223 PLA PARP1 HIF1A _ah_Norm AZ Position006 Image 34_[ims1_2023-09-20T09-58-56.870].ims
629000		2	Image 1	126	AZ DAPI.icsx_[ibrx_2023-09-20T09-58-56.870]	700001	37	AZ DAPI.icsx_[ibrx_2023-09-20T09-58-56.870]	700001	61223 PLA PARP1 HIF1A _ah_Norm AZ Position006 Image 34_[ims1_2023-09-20T09-58-56.870].ims	/Users/mzglab_user/Desktop/esv/pla hif1a parp1 2023/imaris/normoxia/az3146/61223 PLA PARP1 HIF1A _ah_Norm AZ Position006 Image 34_[ims1_2023-09-20T09-58-56.870].ims
1240000		2	Image 1	127	AZ DAPI.icsx_[ibrx_2023-09-20T09-58-56.870]	700001	47	AZ DAPI.icsx_[ibrx_2023-09-20T09-58-56.870]	700001	61223 PLA PARP1 HIF1A _ah_Norm AZ Position006 Image 34_[ims1_2023-09-20T09-58-56.870].ims	/Users/mzglab_user/Desktop/esv/pla hif1a parp1 2023/imaris/normoxia/az3146/61223 PLA PARP1 HIF1A _ah_Norm AZ Position006 Image 34_[ims1_2023-09-20T09-58-56.870].ims
1150000		2	Image 1	128	AZ DAPI.icsx_[ibrx_2023-09-20T09-58-56.870]	700001	65	AZ DAPI.icsx_[ibrx_2023-09-20T09-58-56.870]	700001	61223 PLA PARP1 HIF1A _ah_Norm AZ Position006 Image 34_[ims1_2023-09-20T09-58-56.870].ims	/Users/mzglab_user/Desktop/esv/pla hif1a parp1 2023/imaris/normoxia/az3146/61223 PLA PARP1 HIF1A _ah_Norm AZ Position006 Image 34_[ims1_2023-09-20T09-58-56.870].ims
1930000		2	Image 1	129	AZ DAPI.icsx_[ibrx_2023-09-20T09-58-56.870]	700001	69	AZ DAPI.icsx_[ibrx_2023-09-20T09-58-56.870]	700001	61223 PLA PARP1 HIF1A _ah_Norm AZ Position006 Image 34_[ims1_2023-09-20T09-58-56.870].ims	/Users/mzglab_user/Desktop/esv/pla hif1a parp1 2023/imaris/normoxia/az3146/61223 PLA PARP1 HIF1A _ah_Norm AZ Position006 Image 34_[ims1_2023-09-20T09-58-56.870].ims
1780000		2	Image 1	130	AZ DAPI.icsx_[ibrx_2023-09-20T09-58-56.870]	700001	92	AZ DAPI.icsx_[ibrx_2023-09-20T09-58-56.870]	700001	61223 PLA PARP1 HIF1A _ah_Norm AZ Position006 Image 34_[ims1_2023-09-20T09-58-56.870].ims	/Users/mzglab_user/Desktop/esv/pla hif1a parp1 2023/imaris/normoxia/az3146/61223 PLA PARP1 HIF1A _ah_Norm AZ Position006 Image 34_[ims1_2023-09-20T09-58-56.870].ims
1650000		2	Image 1	131	AZ DAPI.icsx_[ibrx_2023-09-20T09-58-56.870]	700001	101	AZ DAPI.icsx_[ibrx_2023-09-20T09-58-56.870]	700001	61223 PLA PARP1 HIF1A _ah_Norm AZ Position006 Image 34_[ims1_2023-09-20T09-58-56.870].ims	/Users/mzglab_user/Desktop/esv/pla hif1a parp1 2023/imaris/normoxia/az3146/61223 PLA PARP1 HIF1A _ah_Norm AZ Position006 Image 34_[ims1_2023-09-20T09-58-56.870].ims
2070000		2	Image 1	132	AZ DAPI.icsx_[ibrx_2023-09-20T09-58-56.870]	700001	119	AZ DAPI.icsx_[ibrx_2023-09-20T09-58-56.870]	700001	61223 PLA PARP1 HIF1A _ah_Norm AZ Position006 Image 34_[ims1_2023-09-20T09-58-56.870].ims	/Users/mzglab_user/Desktop/esv/pla hif1a parp1 2023/imaris/normoxia/az3146/61223 PLA PARP1 HIF1A _ah_Norm AZ Position006 Image 34_[ims1_2023-09-20T09-58-56.870].ims
4120000		2	Image 1	133	AZ DAPI.icsx_[ibrx_2023-09-20T09-58-56.870]	700001	2	AZ DAPI.icsx_[ibrx_2023-09-20T09-58-56.870]	700001	61223 PLA PARP1 HIF1A _ai_Norm AZ Position007 Image 35_[ims1_2023-09-20T09-58-56.870].ims	/Users/mzglab_user/Desktop/esv/pla hif1a parp1 2023/imaris/normoxia/az3146/61223 PLA PARP1 HIF1A _ai_Norm AZ Position007 Image 35_[ims1_2023-09-20T09-58-56.870].ims
4630000		2	Image 1	134	AZ DAPI.icsx_[ibrx_2023-09-20T09-58-56.870]	700001	8	AZ DAPI.icsx_[ibrx_2023-09-20T09-58-56.870]	700001	61223 PLA PARP1 HIF1A _ai_Norm AZ Position007 Image 35_[ims1_2023-09-20T09-58-56.870].ims	/Users/mzglab_user/Desktop/esv/pla hif1a parp1 2023/imaris/normoxia/az3146/61223 PLA PARP1 HIF1A _ai_Norm AZ Position007 Image 35_[ims1_2023-09-20T09-58-56.870].ims
2140000		2	Image 1	135	AZ DAPI.icsx_[ibrx_2023-09-20T09-58-56.870]	700001	12	AZ DAPI.icsx_[ibrx_2023-09-20T09-58-56.870]	700001	61223 PLA PARP1 HIF1A _ai_Norm AZ Position007 Image 35_[ims1_2023-09-20T09-58-56.870].ims	/Users/mzglab_user/Desktop/esv/pla hif1a parp1 2023/imaris/normoxia/az3146/61223 PLA PARP1 HIF1A _ai_Norm AZ Position007 Image 35_[ims1_2023-09-20T09-58-56.870].ims
4210000		2	Image 1	136	AZ DAPI.icsx_[ibrx_2023-09-20T09-58-56.870]	700001	13	AZ DAPI.icsx_[ibrx_2023-09-20T09-58-56.870]	700001	61223 PLA PARP1 HIF1A _ai_Norm AZ Position007 Image 35_[ims1_2023-09-20T09-58-56.870].ims	/Users/mzglab_user/Desktop/esv/pla hif1a parp1 2023/imaris/normoxia/az3146/61223 PLA PARP1 HIF1A _ai_Norm AZ Position007 Image 35_[ims1_2023-09-20T09-58-56.870].ims
5110000		2	Image 1	137	AZ DAPI.icsx_[ibrx_2023-09-20T09-58-56.870]	700001	16	AZ DAPI.icsx_[ibrx_2023-09-20T09-58-56.870]	700001	61223 PLA PARP1 HIF1A _ai_Norm AZ Position007 Image 35_[ims1_2023-09-20T09-58-56.870].ims	/Users/mzglab_user/Desktop/esv/pla hif1a parp1 2023/imaris/normoxia/az3146/61223 PLA PARP1 HIF1A _ai_Norm AZ Position007 Image 35_[ims1_2023-09-20T09-58-56.870].ims
2820000		2	Image 1	138	AZ DAPI.icsx_[ibrx_2023-09-20T09-58-56.870]	700001	17	AZ DAPI.icsx_[ibrx_2023-09-20T09-58-56.870]	700001	61223 PLA PARP1 HIF1A _ai_Norm AZ Position007 Image 35_[ims1_2023-09-20T09-58-56.870].ims	/Users/mzglab_user/Desktop/esv/pla hif1a parp1 2023/imaris/normoxia/az3146/61223 PLA PARP1 HIF1A _ai_Norm AZ Position007 Image 35_[ims1_2023-09-20T09-58-56.870].ims
6500000		2	Image 1	139	AZ DAPI.icsx_[ibrx_2023-09-20T09-58-56.870]	700001	21	AZ DAPI.icsx_[ibrx_2023-09-20T09-58-56.870]	700001	61223 PLA PARP1 HIF1A _ai_Norm AZ Position007 Image 35_[ims1_2023-09-20T09-58-56.870].ims	/Users/mzglab_user/Desktop/esv/pla hif1a parp1 2023/imaris/normoxia/az3146/61223 PLA PARP1 HIF1A _ai_Norm AZ Position007 Image 35_[ims1_2023-09-20T09-58-56.870].ims
5700000		2	Image 1	140	AZ DAPI.icsx_[ibrx_2023-09-20T09-58-56.870]	700001	27	AZ DAPI.icsx_[ibrx_2023-09-20T09-58-56.870]	700001	61223 PLA PARP1 HIF1A _ai_Norm AZ Position007 Image 35_[ims1_2023-09-20T09-58-56.870].ims	/Users/mzglab_user/Desktop/esv/pla hif1a parp1 2023/imaris/normoxia/az3146/61223 PLA PARP1 HIF1A _ai_Norm AZ Position007 Image 35_[ims1_2023-09-20T09-58-56.870].ims
4360000		2	Image 1	141	AZ DAPI.icsx_[ibrx_2023-09-20T09-58-56.870]	700001	7	AZ DAPI.icsx_[ibrx_2023-09-20T09-58-56.870]	700001	61223 PLA PARP1 HIF1A _aj_Norm AZ Position008 Image 36_[ims1_2023-09-20T09-58-56.870].ims	/Users/mzglab_user/Desktop/esv/pla hif1a parp1 2023/imaris/normoxia/az3146/61223 PLA PARP1 HIF1A _aj_Norm AZ Position008 Image 36_[ims1_2023-09-20T09-58-56.870].ims
6230000		2	Image 1	142	AZ DAPI.icsx_[ibrx_2023-09-20T09-58-56.870]	700001	12	AZ DAPI.icsx_[ibrx_2023-09-20T09-58-56.870]	700001	61223 PLA PARP1 HIF1A _aj_Norm AZ Position008 Image 36_[ims1_2023-09-20T09-58-56.870].ims	/Users/mzglab_user/Desktop/esv/pla hif1a parp1 2023/imaris/normoxia/az3146/61223 PLA PARP1 HIF1A _aj_Norm AZ Position008 Image 36_[ims1_2023-09-20T09-58-56.870].ims
2230000		2	Image 1	143	AZ DAPI.icsx_[ibrx_2023-09-20T09-58-56.870]	700001	13	AZ DAPI.icsx_[ibrx_2023-09-20T09-58-56.870]	700001	61223 PLA PARP1 HIF1A _aj_Norm AZ Position008 Image 36_[ims1_2023-09-20T09-58-56.870].ims	/Users/mzglab_user/Desktop/esv/pla hif1a parp1 2023/imaris/normoxia/az3146/61223 PLA PARP1 HIF1A _aj_Norm AZ Position008 Image 36_[ims1_2023-09-20T09-58-56.870].ims
6080000		2	Image 1	144	AZ DAPI.icsx_[ibrx_2023-09-20T09-58-56.870]	700001	21	AZ DAPI.icsx_[ibrx_2023-09-20T09-58-56.870]	700001	61223 PLA PARP1 HIF1A _aj_Norm AZ Position008 Image 36_[ims1_2023-09-20T09-58-56.870].ims	/Users/mzglab_user/Desktop/esv/pla hif1a parp1 2023/imaris/normoxia/az3146/61223 PLA PARP1 HIF1A _aj_Norm AZ Position008 Image 36_[ims1_2023-09-20T09-58-56.870].ims
2220000		2	Image 1	145	AZ DAPI.icsx_[ibrx_2023-09-20T09-58-56.870]	700001	25	AZ DAPI.icsx_[ibrx_2023-09-20T09-58-56.870]	700001	61223 PLA PARP1 HIF1A _aj_Norm AZ Position008 Image 36_[ims1_2023-09-20T09-58-56.870].ims	/Users/mzglab_user/Desktop/esv/pla hif1a parp1 2023/imaris/normoxia/az3146/61223 PLA PARP1 HIF1A _aj_Norm AZ Position008 Image 36_[ims1_2023-09-20T09-58-56.870].ims
3550000		2	Image 1	146	AZ DAPI.icsx_[ibrx_2023-09-20T09-58-56.870]	700001	27	AZ DAPI.icsx_[ibrx_2023-09-20T09-58-56.870]	700001	61223 PLA PARP1 HIF1A _aj_Norm AZ Position008 Image 36_[ims1_2023-09-20T09-58-56.870].ims	/Users/mzglab_user/Desktop/esv/pla hif1a parp1 2023/imaris/normoxia/az3146/61223 PLA PARP1 HIF1A _aj_Norm AZ Position008 Image 36_[ims1_2023-09-20T09-58-56.870].ims
6490000		2	Image 1	147	AZ DAPI.icsx_[ibrx_2023-09-20T09-58-56.870]	700001	36	AZ DAPI.icsx_[ibrx_2023-09-20T09-58-56.870]	700001	61223 PLA PARP1 HIF1A _aj_Norm AZ Position008 Image 36_[ims1_2023-09-20T09-58-56.870].ims	/Users/mzglab_user/Desktop/esv/pla hif1a parp1 2023/imaris/normoxia/az3146/61223 PLA PARP1 HIF1A _aj_Norm AZ Position008 Image 36_[ims1_2023-09-20T09-58-56.870].ims
2280000		2	Image 1	148	AZ DAPI.icsx_[ibrx_2023-09-20T09-58-56.870]	700001	37	AZ DAPI.icsx_[ibrx_2023-09-20T09-58-56.870]	700001	61223 PLA PARP1 HIF1A _aj_Norm AZ Position008 Image 36_[ims1_2023-09-20T09-58-56.870].ims	/Users/mzglab_user/Desktop/esv/pla hif1a parp1 2023/imaris/normoxia/az3146/61223 PLA PARP1 HIF1A _aj_Norm AZ Position008 Image 36_[ims1_2023-09-20T09-58-56.870].ims
917000		2	Image 1	149	AZ DAPI.icsx_[ibrx_2023-09-20T09-58-56.870]	700001	0	AZ DAPI.icsx_[ibrx_2023-09-20T09-58-56.870]	700001	61223 PLA PARP1 HIF1A _ak_Norm AZ Position009 Image 37_[ims1_2023-09-20T09-58-56.870].ims	/Users/mzglab_user/Desktop/esv/pla hif1a parp1 2023/imaris/normoxia/az3146/61223 PLA PARP1 HIF1A _ak_Norm AZ Position009 Image 37_[ims1_2023-09-20T09-58-56.870].ims
1850000		2	Image 1	150	AZ DAPI.icsx_[ibrx_2023-09-20T09-58-56.870]	700001	2	AZ DAPI.icsx_[ibrx_2023-09-20T09-58-56.870]	700001	61223 PLA PARP1 HIF1A _ak_Norm AZ Position009 Image 37_[ims1_2023-09-20T09-58-56.870].ims	/Users/mzglab_user/Desktop/esv/pla hif1a parp1 2023/imaris/normoxia/az3146/61223 PLA PARP1 HIF1A _ak_Norm AZ Position009 Image 37_[ims1_2023-09-20T09-58-56.870].ims
1050000		2	Image 1	151	AZ DAPI.icsx_[ibrx_2023-09-20T09-58-56.870]	700001	3	AZ DAPI.icsx_[ibrx_2023-09-20T09-58-56.870]	700001	61223 PLA PARP1 HIF1A _ak_Norm AZ Position009 Image 37_[ims1_2023-09-20T09-58-56.870].ims	/Users/mzglab_user/Desktop/esv/pla hif1a parp1 2023/imaris/normoxia/az3146/61223 PLA PARP1 HIF1A _ak_Norm AZ Position009 Image 37_[ims1_2023-09-20T09-58-56.870].ims
1020000		2	Image 1	152	AZ DAPI.icsx_[ibrx_2023-09-20T09-58-56.870]	700001	4	AZ DAPI.icsx_[ibrx_2023-09-20T09-58-56.870]	700001	61223 PLA PARP1 HIF1A _ak_Norm AZ Position009 Image 37_[ims1_2023-09-20T09-58-56.870].ims	/Users/mzglab_user/Desktop/esv/pla hif1a parp1 2023/imaris/normoxia/az3146/61223 PLA PARP1 HIF1A _ak_Norm AZ Position009 Image 37_[ims1_2023-09-20T09-58-56.870].ims
1570000		2	Image 1	153	AZ DAPI.icsx_[ibrx_2023-09-20T09-58-56.870]	700001	6	AZ DAPI.icsx_[ibrx_2023-09-20T09-58-56.870]	700001	61223 PLA PARP1 HIF1A _ak_Norm AZ Position009 Image 37_[ims1_2023-09-20T09-58-56.870].ims	/Users/mzglab_user/Desktop/esv/pla hif1a parp1 2023/imaris/normoxia/az3146/61223 PLA PARP1 HIF1A _ak_Norm AZ Position009 Image 37_[ims1_2023-09-20T09-58-56.870].ims
2400000		2	Image 1	154	AZ DAPI.icsx_[ibrx_2023-09-20T09-58-56.870]	700001	7	AZ DAPI.icsx_[ibrx_2023-09-20T09-58-56.870]	700001	61223 PLA PARP1 HIF1A _ak_Norm AZ Position009 Image 37_[ims1_2023-09-20T09-58-56.870].ims	/Users/mzglab_user/Desktop/esv/pla hif1a parp1 2023/imaris/normoxia/az3146/61223 PLA PARP1 HIF1A _ak_Norm AZ Position009 Image 37_[ims1_2023-09-20T09-58-56.870].ims
2640000		2	Image 1	155	AZ DAPI.icsx_[ibrx_2023-09-20T09-58-56.870]	700001	9	AZ DAPI.icsx_[ibrx_2023-09-20T09-58-56.870]	700001	61223 PLA PARP1 HIF1A _ak_Norm AZ Position009 Image 37_[ims1_2023-09-20T09-58-56.870].ims	/Users/mzglab_user/Desktop/esv/pla hif1a parp1 2023/imaris/normoxia/az3146/61223 PLA PARP1 HIF1A _ak_Norm AZ Position009 Image 37_[ims1_2023-09-20T09-58-56.870].ims
3100000		2	Image 1	156	AZ DAPI.icsx_[ibrx_2023-09-20T09-58-56.870]	700001	11	AZ DAPI.icsx_[ibrx_2023-09-20T09-58-56.870]	700001	61223 PLA PARP1 HIF1A _ak_Norm AZ Position009 Image 37_[ims1_2023-09-20T09-58-56.870].ims	/Users/mzglab_user/Desktop/esv/pla hif1a parp1 2023/imaris/normoxia/az3146/61223 PLA PARP1 HIF1A _ak_Norm AZ Position009 Image 37_[ims1_2023-09-20T09-58-56.870].ims
721000		2	Image 1	157	AZ DAPI.icsx_[ibrx_2023-09-20T09-58-56.870]	700001	2	AZ DAPI.icsx_[ibrx_2023-09-20T09-58-56.870]	700001	61223 PLA PARP1 HIF1A _al_Norm AZ Position010 Image 38_[ims1_2023-09-20T09-58-56.870].ims	/Users/mzglab_user/Desktop/esv/pla hif1a parp1 2023/imaris/normoxia/az3146/61223 PLA PARP1 HIF1A _al_Norm AZ Position010 Image 38_[ims1_2023-09-20T09-58-56.870].ims
1750000		2	Image 1	158	AZ DAPI.icsx_[ibrx_2023-09-20T09-58-56.870]	700001	6	AZ DAPI.icsx_[ibrx_2023-09-20T09-58-56.870]	700001	61223 PLA PARP1 HIF1A _al_Norm AZ Position010 Image 38_[ims1_2023-09-20T09-58-56.870].ims	/Users/mzglab_user/Desktop/esv/pla hif1a parp1 2023/imaris/normoxia/az3146/61223 PLA PARP1 HIF1A _al_Norm AZ Position010 Image 38_[ims1_2023-09-20T09-58-56.870].ims
1360000		2	Image 1	159	AZ DAPI.icsx_[ibrx_2023-09-20T09-58-56.870]	700001	7	AZ DAPI.icsx_[ibrx_2023-09-20T09-58-56.870]	700001	61223 PLA PARP1 HIF1A _al_Norm AZ Position010 Image 38_[ims1_2023-09-20T09-58-56.870].ims	/Users/mzglab_user/Desktop/esv/pla hif1a parp1 2023/imaris/normoxia/az3146/61223 PLA PARP1 HIF1A _al_Norm AZ Position010 Image 38_[ims1_2023-09-20T09-58-56.870].ims
673000		2	Image 1	160	AZ DAPI.icsx_[ibrx_2023-09-20T09-58-56.870]	700001	16	AZ DAPI.icsx_[ibrx_2023-09-20T09-58-56.870]	700001	61223 PLA PARP1 HIF1A _al_Norm AZ Position010 Image 38_[ims1_2023-09-20T09-58-56.870].ims	/Users/mzglab_user/Desktop/esv/pla hif1a parp1 2023/imaris/normoxia/az3146/61223 PLA PARP1 HIF1A _al_Norm AZ Position010 Image 38_[ims1_2023-09-20T09-58-56.870].ims
656000		2	Image 1	161	AZ DAPI.icsx_[ibrx_2023-09-20T09-58-56.870]	700001	18	AZ DAPI.icsx_[ibrx_2023-09-20T09-58-56.870]	700001	61223 PLA PARP1 HIF1A _al_Norm AZ Position010 Image 38_[ims1_2023-09-20T09-58-56.870].ims	/Users/mzglab_user/Desktop/esv/pla hif1a parp1 2023/imaris/normoxia/az3146/61223 PLA PARP1 HIF1A _al_Norm AZ Position010 Image 38_[ims1_2023-09-20T09-58-56.870].ims
2370000		2	Image 1	162	AZ DAPI.icsx_[ibrx_2023-09-20T09-58-56.870]	700001	19	AZ DAPI.icsx_[ibrx_2023-09-20T09-58-56.870]	700001	61223 PLA PARP1 HIF1A _al_Norm AZ Position010 Image 38_[ims1_2023-09-20T09-58-56.870].ims	/Users/mzglab_user/Desktop/esv/pla hif1a parp1 2023/imaris/normoxia/az3146/61223 PLA PARP1 HIF1A _al_Norm AZ Position010 Image 38_[ims1_2023-09-20T09-58-56.870].ims
3210000		2	Image 1	163	AZ DAPI.icsx_[ibrx_2023-09-20T09-58-56.870]	700001	22	AZ DAPI.icsx_[ibrx_2023-09-20T09-58-56.870]	700001	61223 PLA PARP1 HIF1A _al_Norm AZ Position010 Image 38_[ims1_2023-09-20T09-58-56.870].ims	/Users/mzglab_user/Desktop/esv/pla hif1a parp1 2023/imaris/normoxia/az3146/61223 PLA PARP1 HIF1A _al_Norm AZ Position010 Image 38_[ims1_2023-09-20T09-58-56.870].ims
1150000		2	Image 1	164	AZ DAPI.icsx_[ibrx_2023-09-20T09-58-56.870]	700001	24	AZ DAPI.icsx_[ibrx_2023-09-20T09-58-56.870]	700001	61223 PLA PARP1 HIF1A _al_Norm AZ Position010 Image 38_[ims1_2023-09-20T09-58-56.870].ims	/Users/mzglab_user/Desktop/esv/pla hif1a parp1 2023/imaris/normoxia/az3146/61223 PLA PARP1 HIF1A _al_Norm AZ Position010 Image 38_[ims1_2023-09-20T09-58-56.870].ims
3010000		2	Image 1	165	AZ DAPI.icsx_[ibrx_2023-09-20T09-58-56.870]	700001	48	AZ DAPI.icsx_[ibrx_2023-09-20T09-58-56.870]	700001	61223 PLA PARP1 HIF1A _am_Norm AZ Position011 Image 39_[ims1_2023-09-20T09-58-56.870].ims	/Users/mzglab_user/Desktop/esv/pla hif1a parp1 2023/imaris/normoxia/az3146/61223 PLA PARP1 HIF1A _am_Norm AZ Position011 Image 39_[ims1_2023-09-20T09-58-56.870].ims
3190000		2	Image 1	166	AZ DAPI.icsx_[ibrx_2023-09-20T09-58-56.870]	700001	50	AZ DAPI.icsx_[ibrx_2023-09-20T09-58-56.870]	700001	61223 PLA PARP1 HIF1A _am_Norm AZ Position011 Image 39_[ims1_2023-09-20T09-58-56.870].ims	/Users/mzglab_user/Desktop/esv/pla hif1a parp1 2023/imaris/normoxia/az3146/61223 PLA PARP1 HIF1A _am_Norm AZ Position011 Image 39_[ims1_2023-09-20T09-58-56.870].ims
4240000		2	Image 1	167	AZ DAPI.icsx_[ibrx_2023-09-20T09-58-56.870]	700001	76	AZ DAPI.icsx_[ibrx_2023-09-20T09-58-56.870]	700001	61223 PLA PARP1 HIF1A _am_Norm AZ Position011 Image 39_[ims1_2023-09-20T09-58-56.870].ims	/Users/mzglab_user/Desktop/esv/pla hif1a parp1 2023/imaris/normoxia/az3146/61223 PLA PARP1 HIF1A _am_Norm AZ Position011 Image 39_[ims1_2023-09-20T09-58-56.870].ims
2320000		2	Image 1	168	AZ DAPI.icsx_[ibrx_2023-09-20T09-58-56.870]	700001	92	AZ DAPI.icsx_[ibrx_2023-09-20T09-58-56.870]	700001	61223 PLA PARP1 HIF1A _am_Norm AZ Position011 Image 39_[ims1_2023-09-20T09-58-56.870].ims	/Users/mzglab_user/Desktop/esv/pla hif1a parp1 2023/imaris/normoxia/az3146/61223 PLA PARP1 HIF1A _am_Norm AZ Position011 Image 39_[ims1_2023-09-20T09-58-56.870].ims
3060000		2	Image 1	169	AZ DAPI.icsx_[ibrx_2023-09-20T09-58-56.870]	700001	96	AZ DAPI.icsx_[ibrx_2023-09-20T09-58-56.870]	700001	61223 PLA PARP1 HIF1A _am_Norm AZ Position011 Image 39_[ims1_2023-09-20T09-58-56.870].ims	/Users/mzglab_user/Desktop/esv/pla hif1a parp1 2023/imaris/normoxia/az3146/61223 PLA PARP1 HIF1A _am_Norm AZ Position011 Image 39_[ims1_2023-09-20T09-58-56.870].ims
1850000		2	Image 1	170	AZ DAPI.icsx_[ibrx_2023-09-20T09-58-56.870]	700001	101	AZ DAPI.icsx_[ibrx_2023-09-20T09-58-56.870]	700001	61223 PLA PARP1 HIF1A _am_Norm AZ Position011 Image 39_[ims1_2023-09-20T09-58-56.870].ims	/Users/mzglab_user/Desktop/esv/pla hif1a parp1 2023/imaris/normoxia/az3146/61223 PLA PARP1 HIF1A _am_Norm AZ Position011 Image 39_[ims1_2023-09-20T09-58-56.870].ims
2220000		2	Image 1	171	AZ DAPI.icsx_[ibrx_2023-09-20T09-58-56.870]	700001	109	AZ DAPI.icsx_[ibrx_2023-09-20T09-58-56.870]	700001	61223 PLA PARP1 HIF1A _am_Norm AZ Position011 Image 39_[ims1_2023-09-20T09-58-56.870].ims	/Users/mzglab_user/Desktop/esv/pla hif1a parp1 2023/imaris/normoxia/az3146/61223 PLA PARP1 HIF1A _am_Norm AZ Position011 Image 39_[ims1_2023-09-20T09-58-56.870].ims
2290000		2	Image 1	172	AZ DAPI.icsx_[ibrx_2023-09-20T09-58-56.870]	700001	112	AZ DAPI.icsx_[ibrx_2023-09-20T09-58-56.870]	700001	61223 PLA PARP1 HIF1A _am_Norm AZ Position011 Image 39_[ims1_2023-09-20T09-58-56.870].ims	/Users/mzglab_user/Desktop/esv/pla hif1a parp1 2023/imaris/normoxia/az3146/61223 PLA PARP1 HIF1A _am_Norm AZ Position011 Image 39_[ims1_2023-09-20T09-58-56.870].ims
1910000		2	Image 1	173	AZ DAPI.icsx_[ibrx_2023-09-20T09-58-56.870]	700001	4	AZ DAPI.icsx_[ibrx_2023-09-20T09-58-56.870]	700001	61223 PLA PARP1 HIF1A _an_Norm AZ Position012 Image 40_[ims1_2023-09-20T09-58-56.870].ims	/Users/mzglab_user/Desktop/esv/pla hif1a parp1 2023/imaris/normoxia/az3146/61223 PLA PARP1 HIF1A _an_Norm AZ Position012 Image 40_[ims1_2023-09-20T09-58-56.870].ims
4500000		2	Image 1	174	AZ DAPI.icsx_[ibrx_2023-09-20T09-58-56.870]	700001	11	AZ DAPI.icsx_[ibrx_2023-09-20T09-58-56.870]	700001	61223 PLA PARP1 HIF1A _an_Norm AZ Position012 Image 40_[ims1_2023-09-20T09-58-56.870].ims	/Users/mzglab_user/Desktop/esv/pla hif1a parp1 2023/imaris/normoxia/az3146/61223 PLA PARP1 HIF1A _an_Norm AZ Position012 Image 40_[ims1_2023-09-20T09-58-56.870].ims
3530000		2	Image 1	175	AZ DAPI.icsx_[ibrx_2023-09-20T09-58-56.870]	700001	15	AZ DAPI.icsx_[ibrx_2023-09-20T09-58-56.870]	700001	61223 PLA PARP1 HIF1A _an_Norm AZ Position012 Image 40_[ims1_2023-09-20T09-58-56.870].ims	/Users/mzglab_user/Desktop/esv/pla hif1a parp1 2023/imaris/normoxia/az3146/61223 PLA PARP1 HIF1A _an_Norm AZ Position012 Image 40_[ims1_2023-09-20T09-58-56.870].ims
3120000		2	Image 1	176	AZ DAPI.icsx_[ibrx_2023-09-20T09-58-56.870]	700001	41	AZ DAPI.icsx_[ibrx_2023-09-20T09-58-56.870]	700001	61223 PLA PARP1 HIF1A _an_Norm AZ Position012 Image 40_[ims1_2023-09-20T09-58-56.870].ims	/Users/mzglab_user/Desktop/esv/pla hif1a parp1 2023/imaris/normoxia/az3146/61223 PLA PARP1 HIF1A _an_Norm AZ Position012 Image 40_[ims1_2023-09-20T09-58-56.870].ims
1020000		2	Image 1	177	AZ DAPI.icsx_[ibrx_2023-09-20T09-58-56.870]	700001	42	AZ DAPI.icsx_[ibrx_2023-09-20T09-58-56.870]	700001	61223 PLA PARP1 HIF1A _an_Norm AZ Position012 Image 40_[ims1_2023-09-20T09-58-56.870].ims	/Users/mzglab_user/Desktop/esv/pla hif1a parp1 2023/imaris/normoxia/az3146/61223 PLA PARP1 HIF1A _an_Norm AZ Position012 Image 40_[ims1_2023-09-20T09-58-56.870].ims
1300000		2	Image 1	178	AZ DAPI.icsx_[ibrx_2023-09-20T09-58-56.870]	700001	54	AZ DAPI.icsx_[ibrx_2023-09-20T09-58-56.870]	700001	61223 PLA PARP1 HIF1A _an_Norm AZ Position012 Image 40_[ims1_2023-09-20T09-58-56.870].ims	/Users/mzglab_user/Desktop/esv/pla hif1a parp1 2023/imaris/normoxia/az3146/61223 PLA PARP1 HIF1A _an_Norm AZ Position012 Image 40_[ims1_2023-09-20T09-58-56.870].ims
5120000		2	Image 1	179	AZ DAPI.icsx_[ibrx_2023-09-20T09-58-56.870]	700001	61	AZ DAPI.icsx_[ibrx_2023-09-20T09-58-56.870]	700001	61223 PLA PARP1 HIF1A _an_Norm AZ Position012 Image 40_[ims1_2023-09-20T09-58-56.870].ims	/Users/mzglab_user/Desktop/esv/pla hif1a parp1 2023/imaris/normoxia/az3146/61223 PLA PARP1 HIF1A _an_Norm AZ Position012 Image 40_[ims1_2023-09-20T09-58-56.870].ims
4000000		2	Image 1	180	AZ DAPI.icsx_[ibrx_2023-09-20T09-58-56.870]	700001	74	AZ DAPI.icsx_[ibrx_2023-09-20T09-58-56.870]	700001	61223 PLA PARP1 HIF1A _an_Norm AZ Position012 Image 40_[ims1_2023-09-20T09-58-56.870].ims	/Users/mzglab_user/Desktop/esv/pla hif1a parp1 2023/imaris/normoxia/az3146/61223 PLA PARP1 HIF1A _an_Norm AZ Position012 Image 40_[ims1_2023-09-20T09-58-56.870].ims
271000		2	Image 1	181	AZ DAPI.icsx_[ibrx_2023-09-20T09-58-56.870]	700001	15	AZ DAPI.icsx_[ibrx_2023-09-20T09-58-56.870]	700001	61223 PLA PARP1 HIF1A _ao_Norm AZ Position013 Image 41_[ims1_2023-09-20T09-58-56.870].ims	/Users/mzglab_user/Desktop/esv/pla hif1a parp1 2023/imaris/normoxia/az3146/61223 PLA PARP1 HIF1A _ao_Norm AZ Position013 Image 41_[ims1_2023-09-20T09-58-56.870].ims
782000		2	Image 1	182	AZ DAPI.icsx_[ibrx_2023-09-20T09-58-56.870]	700001	24	AZ DAPI.icsx_[ibrx_2023-09-20T09-58-56.870]	700001	61223 PLA PARP1 HIF1A _ao_Norm AZ Position013 Image 41_[ims1_2023-09-20T09-58-56.870].ims	/Users/mzglab_user/Desktop/esv/pla hif1a parp1 2023/imaris/normoxia/az3146/61223 PLA PARP1 HIF1A _ao_Norm AZ Position013 Image 41_[ims1_2023-09-20T09-58-56.870].ims
1410000		2	Image 1	183	AZ DAPI.icsx_[ibrx_2023-09-20T09-58-56.870]	700001	27	AZ DAPI.icsx_[ibrx_2023-09-20T09-58-56.870]	700001	61223 PLA PARP1 HIF1A _ao_Norm AZ Position013 Image 41_[ims1_2023-09-20T09-58-56.870].ims	/Users/mzglab_user/Desktop/esv/pla hif1a parp1 2023/imaris/normoxia/az3146/61223 PLA PARP1 HIF1A _ao_Norm AZ Position013 Image 41_[ims1_2023-09-20T09-58-56.870].ims
1395		2	Image 1	184	AZ DAPI.icsx_[ibrx_2023-09-20T09-58-56.870]	700001	31	AZ DAPI.icsx_[ibrx_2023-09-20T09-58-56.870]	700001	61223 PLA PARP1 HIF1A _ao_Norm AZ Position013 Image 41_[ims1_2023-09-20T09-58-56.870].ims	/Users/mzglab_user/Desktop/esv/pla hif1a parp1 2023/imaris/normoxia/az3146/61223 PLA PARP1 HIF1A _ao_Norm AZ Position013 Image 41_[ims1_2023-09-20T09-58-56.870].ims
693000		2	Image 1	185	AZ DAPI.icsx_[ibrx_2023-09-20T09-58-56.870]	700001	34	AZ DAPI.icsx_[ibrx_2023-09-20T09-58-56.870]	700001	61223 PLA PARP1 HIF1A _ao_Norm AZ Position013 Image 41_[ims1_2023-09-20T09-58-56.870].ims	/Users/mzglab_user/Desktop/esv/pla hif1a parp1 2023/imaris/normoxia/az3146/61223 PLA PARP1 HIF1A _ao_Norm AZ Position013 Image 41_[ims1_2023-09-20T09-58-56.870].ims
502000		2	Image 1	186	AZ DAPI.icsx_[ibrx_2023-09-20T09-58-56.870]	700001	42	AZ DAPI.icsx_[ibrx_2023-09-20T09-58-56.870]	700001	61223 PLA PARP1 HIF1A _ao_Norm AZ Position013 Image 41_[ims1_2023-09-20T09-58-56.870].ims	/Users/mzglab_user/Desktop/esv/pla hif1a parp1 2023/imaris/normoxia/az3146/61223 PLA PARP1 HIF1A _ao_Norm AZ Position013 Image 41_[ims1_2023-09-20T09-58-56.870].ims
127000		2	Image 1	187	AZ DAPI.icsx_[ibrx_2023-09-20T09-58-56.870]	700001	44	AZ DAPI.icsx_[ibrx_2023-09-20T09-58-56.870]	700001	61223 PLA PARP1 HIF1A _ao_Norm AZ Position013 Image 41_[ims1_2023-09-20T09-58-56.870].ims	/Users/mzglab_user/Desktop/esv/pla hif1a parp1 2023/imaris/normoxia/az3146/61223 PLA PARP1 HIF1A _ao_Norm AZ Position013 Image 41_[ims1_2023-09-20T09-58-56.870].ims
877000		2	Image 1	188	AZ DAPI.icsx_[ibrx_2023-09-20T09-58-56.870]	700001	45	AZ DAPI.icsx_[ibrx_2023-09-20T09-58-56.870]	700001	61223 PLA PARP1 HIF1A _ao_Norm AZ Position013 Image 41_[ims1_2023-09-20T09-58-56.870].ims	/Users/mzglab_user/Desktop/esv/pla hif1a parp1 2023/imaris/normoxia/az3146/61223 PLA PARP1 HIF1A _ao_Norm AZ Position013 Image 41_[ims1_2023-09-20T09-58-56.870].ims
1590000		2	Image 1	189	AZ DAPI.icsx_[ibrx_2023-09-20T09-58-56.870]	700001	0	AZ DAPI.icsx_[ibrx_2023-09-20T09-58-56.870]	700001	61223 PLA PARP1 HIF1A _ap_Norm AZ Position014 Image 42_[ims1_2023-09-20T09-58-56.870].ims	/Users/mzglab_user/Desktop/esv/pla hif1a parp1 2023/imaris/normoxia/az3146/61223 PLA PARP1 HIF1A _ap_Norm AZ Position014 Image 42_[ims1_2023-09-20T09-58-56.870].ims
761000		2	Image 1	190	AZ DAPI.icsx_[ibrx_2023-09-20T09-58-56.870]	700001	1	AZ DAPI.icsx_[ibrx_2023-09-20T09-58-56.870]	700001	61223 PLA PARP1 HIF1A _ap_Norm AZ Position014 Image 42_[ims1_2023-09-20T09-58-56.870].ims	/Users/mzglab_user/Desktop/esv/pla hif1a parp1 2023/imaris/normoxia/az3146/61223 PLA PARP1 HIF1A _ap_Norm AZ Position014 Image 42_[ims1_2023-09-20T09-58-56.870].ims
1330000		2	Image 1	191	AZ DAPI.icsx_[ibrx_2023-09-20T09-58-56.870]	700001	2	AZ DAPI.icsx_[ibrx_2023-09-20T09-58-56.870]	700001	61223 PLA PARP1 HIF1A _ap_Norm AZ Position014 Image 42_[ims1_2023-09-20T09-58-56.870].ims	/Users/mzglab_user/Desktop/esv/pla hif1a parp1 2023/imaris/normoxia/az3146/61223 PLA PARP1 HIF1A _ap_Norm AZ Position014 Image 42_[ims1_2023-09-20T09-58-56.870].ims
1210000		2	Image 1	192	AZ DAPI.icsx_[ibrx_2023-09-20T09-58-56.870]	700001	6	AZ DAPI.icsx_[ibrx_2023-09-20T09-58-56.870]	700001	61223 PLA PARP1 HIF1A _ap_Norm AZ Position014 Image 42_[ims1_2023-09-20T09-58-56.870].ims	/Users/mzglab_user/Desktop/esv/pla hif1a parp1 2023/imaris/normoxia/az3146/61223 PLA PARP1 HIF1A _ap_Norm AZ Position014 Image 42_[ims1_2023-09-20T09-58-56.870].ims
1110000		2	Image 1	193	AZ DAPI.icsx_[ibrx_2023-09-20T09-58-56.870]	700001	8	AZ DAPI.icsx_[ibrx_2023-09-20T09-58-56.870]	700001	61223 PLA PARP1 HIF1A _ap_Norm AZ Position014 Image 42_[ims1_2023-09-20T09-58-56.870].ims	/Users/mzglab_user/Desktop/esv/pla hif1a parp1 2023/imaris/normoxia/az3146/61223 PLA PARP1 HIF1A _ap_Norm AZ Position014 Image 42_[ims1_2023-09-20T09-58-56.870].ims
2310000		2	Image 1	194	AZ DAPI.icsx_[ibrx_2023-09-20T09-58-56.870]	700001	9	AZ DAPI.icsx_[ibrx_2023-09-20T09-58-56.870]	700001	61223 PLA PARP1 HIF1A _ap_Norm AZ Position014 Image 42_[ims1_2023-09-20T09-58-56.870].ims	/Users/mzglab_user/Desktop/esv/pla hif1a parp1 2023/imaris/normoxia/az3146/61223 PLA PARP1 HIF1A _ap_Norm AZ Position014 Image 42_[ims1_2023-09-20T09-58-56.870].ims
4090000		2	Image 1	195	AZ DAPI.icsx_[ibrx_2023-09-20T09-58-56.870]	700001	13	AZ DAPI.icsx_[ibrx_2023-09-20T09-58-56.870]	700001	61223 PLA PARP1 HIF1A _ap_Norm AZ Position014 Image 42_[ims1_2023-09-20T09-58-56.870].ims	/Users/mzglab_user/Desktop/esv/pla hif1a parp1 2023/imaris/normoxia/az3146/61223 PLA PARP1 HIF1A _ap_Norm AZ Position014 Image 42_[ims1_2023-09-20T09-58-56.870].ims
2870000		2	Image 1	196	AZ DAPI.icsx_[ibrx_2023-09-20T09-58-56.870]	700001	14	AZ DAPI.icsx_[ibrx_2023-09-20T09-58-56.870]	700001	61223 PLA PARP1 HIF1A _ap_Norm AZ Position014 Image 42_[ims1_2023-09-20T09-58-56.870].ims	/Users/mzglab_user/Desktop/esv/pla hif1a parp1 2023/imaris/normoxia/az3146/61223 PLA PARP1 HIF1A _ap_Norm AZ Position014 Image 42_[ims1_2023-09-20T09-58-56.870].ims
1170000		2	Image 1	197	AZ DAPI.icsx_[ibrx_2023-09-20T09-58-56.870]	700001	0	AZ DAPI.icsx_[ibrx_2023-09-20T09-58-56.870]	700001	61223 PLA PARP1 HIF1A _aq_Norm AZ Position015 Image 43_[ims1_2023-09-20T09-58-56.870].ims	/Users/mzglab_user/Desktop/esv/pla hif1a parp1 2023/imaris/normoxia/az3146/61223 PLA PARP1 HIF1A _aq_Norm AZ Position015 Image 43_[ims1_2023-09-20T09-58-56.870].ims
2660000		2	Image 1	198	AZ DAPI.icsx_[ibrx_2023-09-20T09-58-56.870]	700001	9	AZ DAPI.icsx_[ibrx_2023-09-20T09-58-56.870]	700001	61223 PLA PARP1 HIF1A _aq_Norm AZ Position015 Image 43_[ims1_2023-09-20T09-58-56.870].ims	/Users/mzglab_user/Desktop/esv/pla hif1a parp1 2023/imaris/normoxia/az3146/61223 PLA PARP1 HIF1A _aq_Norm AZ Position015 Image 43_[ims1_2023-09-20T09-58-56.870].ims
2370000		2	Image 1	199	AZ DAPI.icsx_[ibrx_2023-09-20T09-58-56.870]	700001	12	AZ DAPI.icsx_[ibrx_2023-09-20T09-58-56.870]	700001	61223 PLA PARP1 HIF1A _aq_Norm AZ Position015 Image 43_[ims1_2023-09-20T09-58-56.870].ims	/Users/mzglab_user/Desktop/esv/pla hif1a parp1 2023/imaris/normoxia/az3146/61223 PLA PARP1 HIF1A _aq_Norm AZ Position015 Image 43_[ims1_2023-09-20T09-58-56.870].ims
3510000		2	Image 1	200	AZ DAPI.icsx_[ibrx_2023-09-20T09-58-56.870]	700001	16	AZ DAPI.icsx_[ibrx_2023-09-20T09-58-56.870]	700001	61223 PLA PARP1 HIF1A _aq_Norm AZ Position015 Image 43_[ims1_2023-09-20T09-58-56.870].ims	/Users/mzglab_user/Desktop/esv/pla hif1a parp1 2023/imaris/normoxia/az3146/61223 PLA PARP1 HIF1A _aq_Norm AZ Position015 Image 43_[ims1_2023-09-20T09-58-56.870].ims
