# Supplementary material for: HIF1A-mediated pathways promote euploid cell survival in chromosomally mosaic embryos
Source: eLife. 2025 Oct 14;13:RP101912. doi: 10.7554/eLife.101912 (PMC12520657; doi:10.7554/eLife.101912)
Supplement: Figure 3—source data 4. [file elife-101912-fig3-data4.xls]

## Sheet: Scatter Plot 1D
Scatter Plot 1D
Intensity Sum Ch=2 Img=1	Unit	Channel	Image	ID	Surpass Object	Surpass Object Data ID	Original ID	Original Component Name	Original Component ID	Original Image Name	Original Image ID
2650000		2	Image 1	2	AZ DAPI.icsx_[ibrx_2023-09-20T09-46-48.544]	700001	2	AZ DAPI.icsx_[ibrx_2023-09-20T09-46-48.544]	700001	61223 PLA PARP1 HIF1A _ar_Hyp Rev Position001 Image 44_[ims1_2023-09-20T09-46-48.544].ims	/Users/mzglab_user/Desktop/esv/pla hif1a parp1 2023/imaris/hypoxia/reversine/61223 PLA PARP1 HIF1A _ar_Hyp Rev Position001 Image 44_[ims1_2023-09-20T09-46-48.544].ims
3590000		2	Image 1	16	AZ DAPI.icsx_[ibrx_2023-09-20T09-46-48.544]	700001	16	AZ DAPI.icsx_[ibrx_2023-09-20T09-46-48.544]	700001	61223 PLA PARP1 HIF1A _ar_Hyp Rev Position001 Image 44_[ims1_2023-09-20T09-46-48.544].ims	/Users/mzglab_user/Desktop/esv/pla hif1a parp1 2023/imaris/hypoxia/reversine/61223 PLA PARP1 HIF1A _ar_Hyp Rev Position001 Image 44_[ims1_2023-09-20T09-46-48.544].ims
3980000		2	Image 1	20	AZ DAPI.icsx_[ibrx_2023-09-20T09-46-48.544]	700001	20	AZ DAPI.icsx_[ibrx_2023-09-20T09-46-48.544]	700001	61223 PLA PARP1 HIF1A _ar_Hyp Rev Position001 Image 44_[ims1_2023-09-20T09-46-48.544].ims	/Users/mzglab_user/Desktop/esv/pla hif1a parp1 2023/imaris/hypoxia/reversine/61223 PLA PARP1 HIF1A _ar_Hyp Rev Position001 Image 44_[ims1_2023-09-20T09-46-48.544].ims
2080000		2	Image 1	22	AZ DAPI.icsx_[ibrx_2023-09-20T09-46-48.544]	700001	22	AZ DAPI.icsx_[ibrx_2023-09-20T09-46-48.544]	700001	61223 PLA PARP1 HIF1A _ar_Hyp Rev Position001 Image 44_[ims1_2023-09-20T09-46-48.544].ims	/Users/mzglab_user/Desktop/esv/pla hif1a parp1 2023/imaris/hypoxia/reversine/61223 PLA PARP1 HIF1A _ar_Hyp Rev Position001 Image 44_[ims1_2023-09-20T09-46-48.544].ims
3980000		2	Image 1	23	AZ DAPI.icsx_[ibrx_2023-09-20T09-46-48.544]	700001	23	AZ DAPI.icsx_[ibrx_2023-09-20T09-46-48.544]	700001	61223 PLA PARP1 HIF1A _ar_Hyp Rev Position001 Image 44_[ims1_2023-09-20T09-46-48.544].ims	/Users/mzglab_user/Desktop/esv/pla hif1a parp1 2023/imaris/hypoxia/reversine/61223 PLA PARP1 HIF1A _ar_Hyp Rev Position001 Image 44_[ims1_2023-09-20T09-46-48.544].ims
3620000		2	Image 1	25	AZ DAPI.icsx_[ibrx_2023-09-20T09-46-48.544]	700001	25	AZ DAPI.icsx_[ibrx_2023-09-20T09-46-48.544]	700001	61223 PLA PARP1 HIF1A _ar_Hyp Rev Position001 Image 44_[ims1_2023-09-20T09-46-48.544].ims	/Users/mzglab_user/Desktop/esv/pla hif1a parp1 2023/imaris/hypoxia/reversine/61223 PLA PARP1 HIF1A _ar_Hyp Rev Position001 Image 44_[ims1_2023-09-20T09-46-48.544].ims
2910000		2	Image 1	39	AZ DAPI.icsx_[ibrx_2023-09-20T09-46-48.544]	700001	39	AZ DAPI.icsx_[ibrx_2023-09-20T09-46-48.544]	700001	61223 PLA PARP1 HIF1A _ar_Hyp Rev Position001 Image 44_[ims1_2023-09-20T09-46-48.544].ims	/Users/mzglab_user/Desktop/esv/pla hif1a parp1 2023/imaris/hypoxia/reversine/61223 PLA PARP1 HIF1A _ar_Hyp Rev Position001 Image 44_[ims1_2023-09-20T09-46-48.544].ims
3080000		2	Image 1	45	AZ DAPI.icsx_[ibrx_2023-09-20T09-46-48.544]	700001	45	AZ DAPI.icsx_[ibrx_2023-09-20T09-46-48.544]	700001	61223 PLA PARP1 HIF1A _ar_Hyp Rev Position001 Image 44_[ims1_2023-09-20T09-46-48.544].ims	/Users/mzglab_user/Desktop/esv/pla hif1a parp1 2023/imaris/hypoxia/reversine/61223 PLA PARP1 HIF1A _ar_Hyp Rev Position001 Image 44_[ims1_2023-09-20T09-46-48.544].ims
1360000		2	Image 1	46	AZ DAPI.icsx_[ibrx_2023-09-20T09-46-48.544]	700001	1	AZ DAPI.icsx_[ibrx_2023-09-20T09-46-48.544]	700001	61223 PLA PARP1 HIF1A _as_Hyp Rev Position002 Image 45_[ims1_2023-09-20T09-46-48.544].ims	/Users/mzglab_user/Desktop/esv/pla hif1a parp1 2023/imaris/hypoxia/reversine/61223 PLA PARP1 HIF1A _as_Hyp Rev Position002 Image 45_[ims1_2023-09-20T09-46-48.544].ims
995000		2	Image 1	47	AZ DAPI.icsx_[ibrx_2023-09-20T09-46-48.544]	700001	14	AZ DAPI.icsx_[ibrx_2023-09-20T09-46-48.544]	700001	61223 PLA PARP1 HIF1A _as_Hyp Rev Position002 Image 45_[ims1_2023-09-20T09-46-48.544].ims	/Users/mzglab_user/Desktop/esv/pla hif1a parp1 2023/imaris/hypoxia/reversine/61223 PLA PARP1 HIF1A _as_Hyp Rev Position002 Image 45_[ims1_2023-09-20T09-46-48.544].ims
1040000		2	Image 1	48	AZ DAPI.icsx_[ibrx_2023-09-20T09-46-48.544]	700001	15	AZ DAPI.icsx_[ibrx_2023-09-20T09-46-48.544]	700001	61223 PLA PARP1 HIF1A _as_Hyp Rev Position002 Image 45_[ims1_2023-09-20T09-46-48.544].ims	/Users/mzglab_user/Desktop/esv/pla hif1a parp1 2023/imaris/hypoxia/reversine/61223 PLA PARP1 HIF1A _as_Hyp Rev Position002 Image 45_[ims1_2023-09-20T09-46-48.544].ims
2160000		2	Image 1	49	AZ DAPI.icsx_[ibrx_2023-09-20T09-46-48.544]	700001	16	AZ DAPI.icsx_[ibrx_2023-09-20T09-46-48.544]	700001	61223 PLA PARP1 HIF1A _as_Hyp Rev Position002 Image 45_[ims1_2023-09-20T09-46-48.544].ims	/Users/mzglab_user/Desktop/esv/pla hif1a parp1 2023/imaris/hypoxia/reversine/61223 PLA PARP1 HIF1A _as_Hyp Rev Position002 Image 45_[ims1_2023-09-20T09-46-48.544].ims
2180000		2	Image 1	50	AZ DAPI.icsx_[ibrx_2023-09-20T09-46-48.544]	700001	18	AZ DAPI.icsx_[ibrx_2023-09-20T09-46-48.544]	700001	61223 PLA PARP1 HIF1A _as_Hyp Rev Position002 Image 45_[ims1_2023-09-20T09-46-48.544].ims	/Users/mzglab_user/Desktop/esv/pla hif1a parp1 2023/imaris/hypoxia/reversine/61223 PLA PARP1 HIF1A _as_Hyp Rev Position002 Image 45_[ims1_2023-09-20T09-46-48.544].ims
1140000		2	Image 1	51	AZ DAPI.icsx_[ibrx_2023-09-20T09-46-48.544]	700001	19	AZ DAPI.icsx_[ibrx_2023-09-20T09-46-48.544]	700001	61223 PLA PARP1 HIF1A _as_Hyp Rev Position002 Image 45_[ims1_2023-09-20T09-46-48.544].ims	/Users/mzglab_user/Desktop/esv/pla hif1a parp1 2023/imaris/hypoxia/reversine/61223 PLA PARP1 HIF1A _as_Hyp Rev Position002 Image 45_[ims1_2023-09-20T09-46-48.544].ims
1970000		2	Image 1	52	AZ DAPI.icsx_[ibrx_2023-09-20T09-46-48.544]	700001	20	AZ DAPI.icsx_[ibrx_2023-09-20T09-46-48.544]	700001	61223 PLA PARP1 HIF1A _as_Hyp Rev Position002 Image 45_[ims1_2023-09-20T09-46-48.544].ims	/Users/mzglab_user/Desktop/esv/pla hif1a parp1 2023/imaris/hypoxia/reversine/61223 PLA PARP1 HIF1A _as_Hyp Rev Position002 Image 45_[ims1_2023-09-20T09-46-48.544].ims
1950000		2	Image 1	53	AZ DAPI.icsx_[ibrx_2023-09-20T09-46-48.544]	700001	9	AZ DAPI.icsx_[ibrx_2023-09-20T09-46-48.544]	700001	61223 PLA PARP1 HIF1A _at_Hyp Rev Position003 Image 46_[ims1_2023-09-20T09-46-48.544].ims	/Users/mzglab_user/Desktop/esv/pla hif1a parp1 2023/imaris/hypoxia/reversine/61223 PLA PARP1 HIF1A _at_Hyp Rev Position003 Image 46_[ims1_2023-09-20T09-46-48.544].ims
1620000		2	Image 1	54	AZ DAPI.icsx_[ibrx_2023-09-20T09-46-48.544]	700001	16	AZ DAPI.icsx_[ibrx_2023-09-20T09-46-48.544]	700001	61223 PLA PARP1 HIF1A _at_Hyp Rev Position003 Image 46_[ims1_2023-09-20T09-46-48.544].ims	/Users/mzglab_user/Desktop/esv/pla hif1a parp1 2023/imaris/hypoxia/reversine/61223 PLA PARP1 HIF1A _at_Hyp Rev Position003 Image 46_[ims1_2023-09-20T09-46-48.544].ims
1620000		2	Image 1	55	AZ DAPI.icsx_[ibrx_2023-09-20T09-46-48.544]	700001	17	AZ DAPI.icsx_[ibrx_2023-09-20T09-46-48.544]	700001	61223 PLA PARP1 HIF1A _at_Hyp Rev Position003 Image 46_[ims1_2023-09-20T09-46-48.544].ims	/Users/mzglab_user/Desktop/esv/pla hif1a parp1 2023/imaris/hypoxia/reversine/61223 PLA PARP1 HIF1A _at_Hyp Rev Position003 Image 46_[ims1_2023-09-20T09-46-48.544].ims
1190000		2	Image 1	56	AZ DAPI.icsx_[ibrx_2023-09-20T09-46-48.544]	700001	20	AZ DAPI.icsx_[ibrx_2023-09-20T09-46-48.544]	700001	61223 PLA PARP1 HIF1A _at_Hyp Rev Position003 Image 46_[ims1_2023-09-20T09-46-48.544].ims	/Users/mzglab_user/Desktop/esv/pla hif1a parp1 2023/imaris/hypoxia/reversine/61223 PLA PARP1 HIF1A _at_Hyp Rev Position003 Image 46_[ims1_2023-09-20T09-46-48.544].ims
2000000		2	Image 1	57	AZ DAPI.icsx_[ibrx_2023-09-20T09-46-48.544]	700001	23	AZ DAPI.icsx_[ibrx_2023-09-20T09-46-48.544]	700001	61223 PLA PARP1 HIF1A _at_Hyp Rev Position003 Image 46_[ims1_2023-09-20T09-46-48.544].ims	/Users/mzglab_user/Desktop/esv/pla hif1a parp1 2023/imaris/hypoxia/reversine/61223 PLA PARP1 HIF1A _at_Hyp Rev Position003 Image 46_[ims1_2023-09-20T09-46-48.544].ims
1470000		2	Image 1	58	AZ DAPI.icsx_[ibrx_2023-09-20T09-46-48.544]	700001	26	AZ DAPI.icsx_[ibrx_2023-09-20T09-46-48.544]	700001	61223 PLA PARP1 HIF1A _at_Hyp Rev Position003 Image 46_[ims1_2023-09-20T09-46-48.544].ims	/Users/mzglab_user/Desktop/esv/pla hif1a parp1 2023/imaris/hypoxia/reversine/61223 PLA PARP1 HIF1A _at_Hyp Rev Position003 Image 46_[ims1_2023-09-20T09-46-48.544].ims
1460000		2	Image 1	59	AZ DAPI.icsx_[ibrx_2023-09-20T09-46-48.544]	700001	31	AZ DAPI.icsx_[ibrx_2023-09-20T09-46-48.544]	700001	61223 PLA PARP1 HIF1A _at_Hyp Rev Position003 Image 46_[ims1_2023-09-20T09-46-48.544].ims	/Users/mzglab_user/Desktop/esv/pla hif1a parp1 2023/imaris/hypoxia/reversine/61223 PLA PARP1 HIF1A _at_Hyp Rev Position003 Image 46_[ims1_2023-09-20T09-46-48.544].ims
1550000		2	Image 1	60	AZ DAPI.icsx_[ibrx_2023-09-20T09-46-48.544]	700001	38	AZ DAPI.icsx_[ibrx_2023-09-20T09-46-48.544]	700001	61223 PLA PARP1 HIF1A _at_Hyp Rev Position003 Image 46_[ims1_2023-09-20T09-46-48.544].ims	/Users/mzglab_user/Desktop/esv/pla hif1a parp1 2023/imaris/hypoxia/reversine/61223 PLA PARP1 HIF1A _at_Hyp Rev Position003 Image 46_[ims1_2023-09-20T09-46-48.544].ims
98800		2	Image 1	61	AZ DAPI.icsx_[ibrx_2023-09-20T09-46-48.544]	700001	5	AZ DAPI.icsx_[ibrx_2023-09-20T09-46-48.544]	700001	61223 PLA PARP1 HIF1A _au_Hyp Rev Position004 Image 47_[ims1_2023-09-20T09-46-48.544].ims	/Users/mzglab_user/Desktop/esv/pla hif1a parp1 2023/imaris/hypoxia/reversine/61223 PLA PARP1 HIF1A _au_Hyp Rev Position004 Image 47_[ims1_2023-09-20T09-46-48.544].ims
58500		2	Image 1	62	AZ DAPI.icsx_[ibrx_2023-09-20T09-46-48.544]	700001	6	AZ DAPI.icsx_[ibrx_2023-09-20T09-46-48.544]	700001	61223 PLA PARP1 HIF1A _au_Hyp Rev Position004 Image 47_[ims1_2023-09-20T09-46-48.544].ims	/Users/mzglab_user/Desktop/esv/pla hif1a parp1 2023/imaris/hypoxia/reversine/61223 PLA PARP1 HIF1A _au_Hyp Rev Position004 Image 47_[ims1_2023-09-20T09-46-48.544].ims
19400		2	Image 1	63	AZ DAPI.icsx_[ibrx_2023-09-20T09-46-48.544]	700001	7	AZ DAPI.icsx_[ibrx_2023-09-20T09-46-48.544]	700001	61223 PLA PARP1 HIF1A _au_Hyp Rev Position004 Image 47_[ims1_2023-09-20T09-46-48.544].ims	/Users/mzglab_user/Desktop/esv/pla hif1a parp1 2023/imaris/hypoxia/reversine/61223 PLA PARP1 HIF1A _au_Hyp Rev Position004 Image 47_[ims1_2023-09-20T09-46-48.544].ims
10400		2	Image 1	64	AZ DAPI.icsx_[ibrx_2023-09-20T09-46-48.544]	700001	8	AZ DAPI.icsx_[ibrx_2023-09-20T09-46-48.544]	700001	61223 PLA PARP1 HIF1A _au_Hyp Rev Position004 Image 47_[ims1_2023-09-20T09-46-48.544].ims	/Users/mzglab_user/Desktop/esv/pla hif1a parp1 2023/imaris/hypoxia/reversine/61223 PLA PARP1 HIF1A _au_Hyp Rev Position004 Image 47_[ims1_2023-09-20T09-46-48.544].ims
77200		2	Image 1	65	AZ DAPI.icsx_[ibrx_2023-09-20T09-46-48.544]	700001	9	AZ DAPI.icsx_[ibrx_2023-09-20T09-46-48.544]	700001	61223 PLA PARP1 HIF1A _au_Hyp Rev Position004 Image 47_[ims1_2023-09-20T09-46-48.544].ims	/Users/mzglab_user/Desktop/esv/pla hif1a parp1 2023/imaris/hypoxia/reversine/61223 PLA PARP1 HIF1A _au_Hyp Rev Position004 Image 47_[ims1_2023-09-20T09-46-48.544].ims
1560000		2	Image 1	66	AZ DAPI.icsx_[ibrx_2023-09-20T09-46-48.544]	700001	10	AZ DAPI.icsx_[ibrx_2023-09-20T09-46-48.544]	700001	61223 PLA PARP1 HIF1A _au_Hyp Rev Position004 Image 47_[ims1_2023-09-20T09-46-48.544].ims	/Users/mzglab_user/Desktop/esv/pla hif1a parp1 2023/imaris/hypoxia/reversine/61223 PLA PARP1 HIF1A _au_Hyp Rev Position004 Image 47_[ims1_2023-09-20T09-46-48.544].ims
6866		2	Image 1	67	AZ DAPI.icsx_[ibrx_2023-09-20T09-46-48.544]	700001	11	AZ DAPI.icsx_[ibrx_2023-09-20T09-46-48.544]	700001	61223 PLA PARP1 HIF1A _au_Hyp Rev Position004 Image 47_[ims1_2023-09-20T09-46-48.544].ims	/Users/mzglab_user/Desktop/esv/pla hif1a parp1 2023/imaris/hypoxia/reversine/61223 PLA PARP1 HIF1A _au_Hyp Rev Position004 Image 47_[ims1_2023-09-20T09-46-48.544].ims
1740000		2	Image 1	68	AZ DAPI.icsx_[ibrx_2023-09-20T09-46-48.544]	700001	2	AZ DAPI.icsx_[ibrx_2023-09-20T09-46-48.544]	700001	61223 PLA PARP1 HIF1A _av_Hyp Rev Position005 Image 48_[ims1_2023-09-20T09-46-48.544].ims	/Users/mzglab_user/Desktop/esv/pla hif1a parp1 2023/imaris/hypoxia/reversine/61223 PLA PARP1 HIF1A _av_Hyp Rev Position005 Image 48_[ims1_2023-09-20T09-46-48.544].ims
4220000		2	Image 1	69	AZ DAPI.icsx_[ibrx_2023-09-20T09-46-48.544]	700001	6	AZ DAPI.icsx_[ibrx_2023-09-20T09-46-48.544]	700001	61223 PLA PARP1 HIF1A _av_Hyp Rev Position005 Image 48_[ims1_2023-09-20T09-46-48.544].ims	/Users/mzglab_user/Desktop/esv/pla hif1a parp1 2023/imaris/hypoxia/reversine/61223 PLA PARP1 HIF1A _av_Hyp Rev Position005 Image 48_[ims1_2023-09-20T09-46-48.544].ims
3310000		2	Image 1	70	AZ DAPI.icsx_[ibrx_2023-09-20T09-46-48.544]	700001	7	AZ DAPI.icsx_[ibrx_2023-09-20T09-46-48.544]	700001	61223 PLA PARP1 HIF1A _av_Hyp Rev Position005 Image 48_[ims1_2023-09-20T09-46-48.544].ims	/Users/mzglab_user/Desktop/esv/pla hif1a parp1 2023/imaris/hypoxia/reversine/61223 PLA PARP1 HIF1A _av_Hyp Rev Position005 Image 48_[ims1_2023-09-20T09-46-48.544].ims
1490000		2	Image 1	71	AZ DAPI.icsx_[ibrx_2023-09-20T09-46-48.544]	700001	9	AZ DAPI.icsx_[ibrx_2023-09-20T09-46-48.544]	700001	61223 PLA PARP1 HIF1A _av_Hyp Rev Position005 Image 48_[ims1_2023-09-20T09-46-48.544].ims	/Users/mzglab_user/Desktop/esv/pla hif1a parp1 2023/imaris/hypoxia/reversine/61223 PLA PARP1 HIF1A _av_Hyp Rev Position005 Image 48_[ims1_2023-09-20T09-46-48.544].ims
3670000		2	Image 1	72	AZ DAPI.icsx_[ibrx_2023-09-20T09-46-48.544]	700001	10	AZ DAPI.icsx_[ibrx_2023-09-20T09-46-48.544]	700001	61223 PLA PARP1 HIF1A _av_Hyp Rev Position005 Image 48_[ims1_2023-09-20T09-46-48.544].ims	/Users/mzglab_user/Desktop/esv/pla hif1a parp1 2023/imaris/hypoxia/reversine/61223 PLA PARP1 HIF1A _av_Hyp Rev Position005 Image 48_[ims1_2023-09-20T09-46-48.544].ims
5010000		2	Image 1	73	AZ DAPI.icsx_[ibrx_2023-09-20T09-46-48.544]	700001	14	AZ DAPI.icsx_[ibrx_2023-09-20T09-46-48.544]	700001	61223 PLA PARP1 HIF1A _av_Hyp Rev Position005 Image 48_[ims1_2023-09-20T09-46-48.544].ims	/Users/mzglab_user/Desktop/esv/pla hif1a parp1 2023/imaris/hypoxia/reversine/61223 PLA PARP1 HIF1A _av_Hyp Rev Position005 Image 48_[ims1_2023-09-20T09-46-48.544].ims
4230000		2	Image 1	74	AZ DAPI.icsx_[ibrx_2023-09-20T09-46-48.544]	700001	17	AZ DAPI.icsx_[ibrx_2023-09-20T09-46-48.544]	700001	61223 PLA PARP1 HIF1A _av_Hyp Rev Position005 Image 48_[ims1_2023-09-20T09-46-48.544].ims	/Users/mzglab_user/Desktop/esv/pla hif1a parp1 2023/imaris/hypoxia/reversine/61223 PLA PARP1 HIF1A _av_Hyp Rev Position005 Image 48_[ims1_2023-09-20T09-46-48.544].ims
4030000		2	Image 1	75	AZ DAPI.icsx_[ibrx_2023-09-20T09-46-48.544]	700001	24	AZ DAPI.icsx_[ibrx_2023-09-20T09-46-48.544]	700001	61223 PLA PARP1 HIF1A _av_Hyp Rev Position005 Image 48_[ims1_2023-09-20T09-46-48.544].ims	/Users/mzglab_user/Desktop/esv/pla hif1a parp1 2023/imaris/hypoxia/reversine/61223 PLA PARP1 HIF1A _av_Hyp Rev Position005 Image 48_[ims1_2023-09-20T09-46-48.544].ims
1850000		2	Image 1	76	AZ DAPI.icsx_[ibrx_2023-09-20T09-46-48.544]	700001	1	AZ DAPI.icsx_[ibrx_2023-09-20T09-46-48.544]	700001	61223 PLA PARP1 HIF1A _aw_Hyp Rev Position006 Image 49_[ims1_2023-09-20T09-46-48.544].ims	/Users/mzglab_user/Desktop/esv/pla hif1a parp1 2023/imaris/hypoxia/reversine/61223 PLA PARP1 HIF1A _aw_Hyp Rev Position006 Image 49_[ims1_2023-09-20T09-46-48.544].ims
1130000		2	Image 1	77	AZ DAPI.icsx_[ibrx_2023-09-20T09-46-48.544]	700001	19	AZ DAPI.icsx_[ibrx_2023-09-20T09-46-48.544]	700001	61223 PLA PARP1 HIF1A _aw_Hyp Rev Position006 Image 49_[ims1_2023-09-20T09-46-48.544].ims	/Users/mzglab_user/Desktop/esv/pla hif1a parp1 2023/imaris/hypoxia/reversine/61223 PLA PARP1 HIF1A _aw_Hyp Rev Position006 Image 49_[ims1_2023-09-20T09-46-48.544].ims
3420000		2	Image 1	78	AZ DAPI.icsx_[ibrx_2023-09-20T09-46-48.544]	700001	22	AZ DAPI.icsx_[ibrx_2023-09-20T09-46-48.544]	700001	61223 PLA PARP1 HIF1A _aw_Hyp Rev Position006 Image 49_[ims1_2023-09-20T09-46-48.544].ims	/Users/mzglab_user/Desktop/esv/pla hif1a parp1 2023/imaris/hypoxia/reversine/61223 PLA PARP1 HIF1A _aw_Hyp Rev Position006 Image 49_[ims1_2023-09-20T09-46-48.544].ims
1080000		2	Image 1	79	AZ DAPI.icsx_[ibrx_2023-09-20T09-46-48.544]	700001	23	AZ DAPI.icsx_[ibrx_2023-09-20T09-46-48.544]	700001	61223 PLA PARP1 HIF1A _aw_Hyp Rev Position006 Image 49_[ims1_2023-09-20T09-46-48.544].ims	/Users/mzglab_user/Desktop/esv/pla hif1a parp1 2023/imaris/hypoxia/reversine/61223 PLA PARP1 HIF1A _aw_Hyp Rev Position006 Image 49_[ims1_2023-09-20T09-46-48.544].ims
2440000		2	Image 1	80	AZ DAPI.icsx_[ibrx_2023-09-20T09-46-48.544]	700001	31	AZ DAPI.icsx_[ibrx_2023-09-20T09-46-48.544]	700001	61223 PLA PARP1 HIF1A _aw_Hyp Rev Position006 Image 49_[ims1_2023-09-20T09-46-48.544].ims	/Users/mzglab_user/Desktop/esv/pla hif1a parp1 2023/imaris/hypoxia/reversine/61223 PLA PARP1 HIF1A _aw_Hyp Rev Position006 Image 49_[ims1_2023-09-20T09-46-48.544].ims
2650000		2	Image 1	81	AZ DAPI.icsx_[ibrx_2023-09-20T09-46-48.544]	700001	47	AZ DAPI.icsx_[ibrx_2023-09-20T09-46-48.544]	700001	61223 PLA PARP1 HIF1A _aw_Hyp Rev Position006 Image 49_[ims1_2023-09-20T09-46-48.544].ims	/Users/mzglab_user/Desktop/esv/pla hif1a parp1 2023/imaris/hypoxia/reversine/61223 PLA PARP1 HIF1A _aw_Hyp Rev Position006 Image 49_[ims1_2023-09-20T09-46-48.544].ims
1900000		2	Image 1	82	AZ DAPI.icsx_[ibrx_2023-09-20T09-46-48.544]	700001	48	AZ DAPI.icsx_[ibrx_2023-09-20T09-46-48.544]	700001	61223 PLA PARP1 HIF1A _aw_Hyp Rev Position006 Image 49_[ims1_2023-09-20T09-46-48.544].ims	/Users/mzglab_user/Desktop/esv/pla hif1a parp1 2023/imaris/hypoxia/reversine/61223 PLA PARP1 HIF1A _aw_Hyp Rev Position006 Image 49_[ims1_2023-09-20T09-46-48.544].ims
1440000		2	Image 1	83	AZ DAPI.icsx_[ibrx_2023-09-20T09-46-48.544]	700001	50	AZ DAPI.icsx_[ibrx_2023-09-20T09-46-48.544]	700001	61223 PLA PARP1 HIF1A _aw_Hyp Rev Position006 Image 49_[ims1_2023-09-20T09-46-48.544].ims	/Users/mzglab_user/Desktop/esv/pla hif1a parp1 2023/imaris/hypoxia/reversine/61223 PLA PARP1 HIF1A _aw_Hyp Rev Position006 Image 49_[ims1_2023-09-20T09-46-48.544].ims
2500000		2	Image 1	84	AZ DAPI.icsx_[ibrx_2023-09-20T09-46-48.544]	700001	2	AZ DAPI.icsx_[ibrx_2023-09-20T09-46-48.544]	700001	61223 PLA PARP1 HIF1A _ax_Hyp Rev Position007 Image 50_[ims1_2023-09-20T09-46-48.544].ims	/Users/mzglab_user/Desktop/esv/pla hif1a parp1 2023/imaris/hypoxia/reversine/61223 PLA PARP1 HIF1A _ax_Hyp Rev Position007 Image 50_[ims1_2023-09-20T09-46-48.544].ims
2930000		2	Image 1	85	AZ DAPI.icsx_[ibrx_2023-09-20T09-46-48.544]	700001	15	AZ DAPI.icsx_[ibrx_2023-09-20T09-46-48.544]	700001	61223 PLA PARP1 HIF1A _ax_Hyp Rev Position007 Image 50_[ims1_2023-09-20T09-46-48.544].ims	/Users/mzglab_user/Desktop/esv/pla hif1a parp1 2023/imaris/hypoxia/reversine/61223 PLA PARP1 HIF1A _ax_Hyp Rev Position007 Image 50_[ims1_2023-09-20T09-46-48.544].ims
1580000		2	Image 1	86	AZ DAPI.icsx_[ibrx_2023-09-20T09-46-48.544]	700001	18	AZ DAPI.icsx_[ibrx_2023-09-20T09-46-48.544]	700001	61223 PLA PARP1 HIF1A _ax_Hyp Rev Position007 Image 50_[ims1_2023-09-20T09-46-48.544].ims	/Users/mzglab_user/Desktop/esv/pla hif1a parp1 2023/imaris/hypoxia/reversine/61223 PLA PARP1 HIF1A _ax_Hyp Rev Position007 Image 50_[ims1_2023-09-20T09-46-48.544].ims
3440000		2	Image 1	87	AZ DAPI.icsx_[ibrx_2023-09-20T09-46-48.544]	700001	25	AZ DAPI.icsx_[ibrx_2023-09-20T09-46-48.544]	700001	61223 PLA PARP1 HIF1A _ax_Hyp Rev Position007 Image 50_[ims1_2023-09-20T09-46-48.544].ims	/Users/mzglab_user/Desktop/esv/pla hif1a parp1 2023/imaris/hypoxia/reversine/61223 PLA PARP1 HIF1A _ax_Hyp Rev Position007 Image 50_[ims1_2023-09-20T09-46-48.544].ims
1740000		2	Image 1	88	AZ DAPI.icsx_[ibrx_2023-09-20T09-46-48.544]	700001	26	AZ DAPI.icsx_[ibrx_2023-09-20T09-46-48.544]	700001	61223 PLA PARP1 HIF1A _ax_Hyp Rev Position007 Image 50_[ims1_2023-09-20T09-46-48.544].ims	/Users/mzglab_user/Desktop/esv/pla hif1a parp1 2023/imaris/hypoxia/reversine/61223 PLA PARP1 HIF1A _ax_Hyp Rev Position007 Image 50_[ims1_2023-09-20T09-46-48.544].ims
2890000		2	Image 1	89	AZ DAPI.icsx_[ibrx_2023-09-20T09-46-48.544]	700001	37	AZ DAPI.icsx_[ibrx_2023-09-20T09-46-48.544]	700001	61223 PLA PARP1 HIF1A _ax_Hyp Rev Position007 Image 50_[ims1_2023-09-20T09-46-48.544].ims	/Users/mzglab_user/Desktop/esv/pla hif1a parp1 2023/imaris/hypoxia/reversine/61223 PLA PARP1 HIF1A _ax_Hyp Rev Position007 Image 50_[ims1_2023-09-20T09-46-48.544].ims
4310000		2	Image 1	90	AZ DAPI.icsx_[ibrx_2023-09-20T09-46-48.544]	700001	41	AZ DAPI.icsx_[ibrx_2023-09-20T09-46-48.544]	700001	61223 PLA PARP1 HIF1A _ax_Hyp Rev Position007 Image 50_[ims1_2023-09-20T09-46-48.544].ims	/Users/mzglab_user/Desktop/esv/pla hif1a parp1 2023/imaris/hypoxia/reversine/61223 PLA PARP1 HIF1A _ax_Hyp Rev Position007 Image 50_[ims1_2023-09-20T09-46-48.544].ims
2780000		2	Image 1	91	AZ DAPI.icsx_[ibrx_2023-09-20T09-46-48.544]	700001	49	AZ DAPI.icsx_[ibrx_2023-09-20T09-46-48.544]	700001	61223 PLA PARP1 HIF1A _ax_Hyp Rev Position007 Image 50_[ims1_2023-09-20T09-46-48.544].ims	/Users/mzglab_user/Desktop/esv/pla hif1a parp1 2023/imaris/hypoxia/reversine/61223 PLA PARP1 HIF1A _ax_Hyp Rev Position007 Image 50_[ims1_2023-09-20T09-46-48.544].ims
1000000		2	Image 1	92	AZ DAPI.icsx_[ibrx_2023-09-20T09-46-48.544]	700001	0	AZ DAPI.icsx_[ibrx_2023-09-20T09-46-48.544]	700001	61223 PLA PARP1 HIF1A _ay_Hyp Rev Position008 Image 51_[ims1_2023-09-20T09-46-48.544].ims	/Users/mzglab_user/Desktop/esv/pla hif1a parp1 2023/imaris/hypoxia/reversine/61223 PLA PARP1 HIF1A _ay_Hyp Rev Position008 Image 51_[ims1_2023-09-20T09-46-48.544].ims
1340000		2	Image 1	93	AZ DAPI.icsx_[ibrx_2023-09-20T09-46-48.544]	700001	18	AZ DAPI.icsx_[ibrx_2023-09-20T09-46-48.544]	700001	61223 PLA PARP1 HIF1A _ay_Hyp Rev Position008 Image 51_[ims1_2023-09-20T09-46-48.544].ims	/Users/mzglab_user/Desktop/esv/pla hif1a parp1 2023/imaris/hypoxia/reversine/61223 PLA PARP1 HIF1A _ay_Hyp Rev Position008 Image 51_[ims1_2023-09-20T09-46-48.544].ims
3610000		2	Image 1	94	AZ DAPI.icsx_[ibrx_2023-09-20T09-46-48.544]	700001	20	AZ DAPI.icsx_[ibrx_2023-09-20T09-46-48.544]	700001	61223 PLA PARP1 HIF1A _ay_Hyp Rev Position008 Image 51_[ims1_2023-09-20T09-46-48.544].ims	/Users/mzglab_user/Desktop/esv/pla hif1a parp1 2023/imaris/hypoxia/reversine/61223 PLA PARP1 HIF1A _ay_Hyp Rev Position008 Image 51_[ims1_2023-09-20T09-46-48.544].ims
2020000		2	Image 1	95	AZ DAPI.icsx_[ibrx_2023-09-20T09-46-48.544]	700001	25	AZ DAPI.icsx_[ibrx_2023-09-20T09-46-48.544]	700001	61223 PLA PARP1 HIF1A _ay_Hyp Rev Position008 Image 51_[ims1_2023-09-20T09-46-48.544].ims	/Users/mzglab_user/Desktop/esv/pla hif1a parp1 2023/imaris/hypoxia/reversine/61223 PLA PARP1 HIF1A _ay_Hyp Rev Position008 Image 51_[ims1_2023-09-20T09-46-48.544].ims
595000		2	Image 1	96	AZ DAPI.icsx_[ibrx_2023-09-20T09-46-48.544]	700001	35	AZ DAPI.icsx_[ibrx_2023-09-20T09-46-48.544]	700001	61223 PLA PARP1 HIF1A _ay_Hyp Rev Position008 Image 51_[ims1_2023-09-20T09-46-48.544].ims	/Users/mzglab_user/Desktop/esv/pla hif1a parp1 2023/imaris/hypoxia/reversine/61223 PLA PARP1 HIF1A _ay_Hyp Rev Position008 Image 51_[ims1_2023-09-20T09-46-48.544].ims
1610000		2	Image 1	97	AZ DAPI.icsx_[ibrx_2023-09-20T09-46-48.544]	700001	40	AZ DAPI.icsx_[ibrx_2023-09-20T09-46-48.544]	700001	61223 PLA PARP1 HIF1A _ay_Hyp Rev Position008 Image 51_[ims1_2023-09-20T09-46-48.544].ims	/Users/mzglab_user/Desktop/esv/pla hif1a parp1 2023/imaris/hypoxia/reversine/61223 PLA PARP1 HIF1A _ay_Hyp Rev Position008 Image 51_[ims1_2023-09-20T09-46-48.544].ims
755000		2	Image 1	98	AZ DAPI.icsx_[ibrx_2023-09-20T09-46-48.544]	700001	48	AZ DAPI.icsx_[ibrx_2023-09-20T09-46-48.544]	700001	61223 PLA PARP1 HIF1A _ay_Hyp Rev Position008 Image 51_[ims1_2023-09-20T09-46-48.544].ims	/Users/mzglab_user/Desktop/esv/pla hif1a parp1 2023/imaris/hypoxia/reversine/61223 PLA PARP1 HIF1A _ay_Hyp Rev Position008 Image 51_[ims1_2023-09-20T09-46-48.544].ims
3060000		2	Image 1	99	AZ DAPI.icsx_[ibrx_2023-09-20T09-46-48.544]	700001	63	AZ DAPI.icsx_[ibrx_2023-09-20T09-46-48.544]	700001	61223 PLA PARP1 HIF1A _ay_Hyp Rev Position008 Image 51_[ims1_2023-09-20T09-46-48.544].ims	/Users/mzglab_user/Desktop/esv/pla hif1a parp1 2023/imaris/hypoxia/reversine/61223 PLA PARP1 HIF1A _ay_Hyp Rev Position008 Image 51_[ims1_2023-09-20T09-46-48.544].ims
1670000		2	Image 1	100	AZ DAPI.icsx_[ibrx_2023-09-20T09-46-48.544]	700001	7	AZ DAPI.icsx_[ibrx_2023-09-20T09-46-48.544]	700001	61223 PLA PARP1 HIF1A _az_Hyp Rev Position009 Image 52_[ims1_2023-09-20T09-46-48.544].ims	/Users/mzglab_user/Desktop/esv/pla hif1a parp1 2023/imaris/hypoxia/reversine/61223 PLA PARP1 HIF1A _az_Hyp Rev Position009 Image 52_[ims1_2023-09-20T09-46-48.544].ims
2240000		2	Image 1	101	AZ DAPI.icsx_[ibrx_2023-09-20T09-46-48.544]	700001	8	AZ DAPI.icsx_[ibrx_2023-09-20T09-46-48.544]	700001	61223 PLA PARP1 HIF1A _az_Hyp Rev Position009 Image 52_[ims1_2023-09-20T09-46-48.544].ims	/Users/mzglab_user/Desktop/esv/pla hif1a parp1 2023/imaris/hypoxia/reversine/61223 PLA PARP1 HIF1A _az_Hyp Rev Position009 Image 52_[ims1_2023-09-20T09-46-48.544].ims
2900000		2	Image 1	102	AZ DAPI.icsx_[ibrx_2023-09-20T09-46-48.544]	700001	12	AZ DAPI.icsx_[ibrx_2023-09-20T09-46-48.544]	700001	61223 PLA PARP1 HIF1A _az_Hyp Rev Position009 Image 52_[ims1_2023-09-20T09-46-48.544].ims	/Users/mzglab_user/Desktop/esv/pla hif1a parp1 2023/imaris/hypoxia/reversine/61223 PLA PARP1 HIF1A _az_Hyp Rev Position009 Image 52_[ims1_2023-09-20T09-46-48.544].ims
4400000		2	Image 1	103	AZ DAPI.icsx_[ibrx_2023-09-20T09-46-48.544]	700001	15	AZ DAPI.icsx_[ibrx_2023-09-20T09-46-48.544]	700001	61223 PLA PARP1 HIF1A _az_Hyp Rev Position009 Image 52_[ims1_2023-09-20T09-46-48.544].ims	/Users/mzglab_user/Desktop/esv/pla hif1a parp1 2023/imaris/hypoxia/reversine/61223 PLA PARP1 HIF1A _az_Hyp Rev Position009 Image 52_[ims1_2023-09-20T09-46-48.544].ims
4400000		2	Image 1	104	AZ DAPI.icsx_[ibrx_2023-09-20T09-46-48.544]	700001	20	AZ DAPI.icsx_[ibrx_2023-09-20T09-46-48.544]	700001	61223 PLA PARP1 HIF1A _az_Hyp Rev Position009 Image 52_[ims1_2023-09-20T09-46-48.544].ims	/Users/mzglab_user/Desktop/esv/pla hif1a parp1 2023/imaris/hypoxia/reversine/61223 PLA PARP1 HIF1A _az_Hyp Rev Position009 Image 52_[ims1_2023-09-20T09-46-48.544].ims
1960000		2	Image 1	105	AZ DAPI.icsx_[ibrx_2023-09-20T09-46-48.544]	700001	22	AZ DAPI.icsx_[ibrx_2023-09-20T09-46-48.544]	700001	61223 PLA PARP1 HIF1A _az_Hyp Rev Position009 Image 52_[ims1_2023-09-20T09-46-48.544].ims	/Users/mzglab_user/Desktop/esv/pla hif1a parp1 2023/imaris/hypoxia/reversine/61223 PLA PARP1 HIF1A _az_Hyp Rev Position009 Image 52_[ims1_2023-09-20T09-46-48.544].ims
2840000		2	Image 1	106	AZ DAPI.icsx_[ibrx_2023-09-20T09-46-48.544]	700001	25	AZ DAPI.icsx_[ibrx_2023-09-20T09-46-48.544]	700001	61223 PLA PARP1 HIF1A _az_Hyp Rev Position009 Image 52_[ims1_2023-09-20T09-46-48.544].ims	/Users/mzglab_user/Desktop/esv/pla hif1a parp1 2023/imaris/hypoxia/reversine/61223 PLA PARP1 HIF1A _az_Hyp Rev Position009 Image 52_[ims1_2023-09-20T09-46-48.544].ims
3190000		2	Image 1	107	AZ DAPI.icsx_[ibrx_2023-09-20T09-46-48.544]	700001	27	AZ DAPI.icsx_[ibrx_2023-09-20T09-46-48.544]	700001	61223 PLA PARP1 HIF1A _az_Hyp Rev Position009 Image 52_[ims1_2023-09-20T09-46-48.544].ims	/Users/mzglab_user/Desktop/esv/pla hif1a parp1 2023/imaris/hypoxia/reversine/61223 PLA PARP1 HIF1A _az_Hyp Rev Position009 Image 52_[ims1_2023-09-20T09-46-48.544].ims
31000		2	Image 1	108	AZ DAPI.icsx_[ibrx_2023-09-20T09-46-48.544]	700001	30	AZ DAPI.icsx_[ibrx_2023-09-20T09-46-48.544]	700001	61223 PLA PARP1 HIF1A _ba_Hyp Rev Position010 Image 53_[ims1_2023-09-20T09-46-48.544].ims	/Users/mzglab_user/Desktop/esv/pla hif1a parp1 2023/imaris/hypoxia/reversine/61223 PLA PARP1 HIF1A _ba_Hyp Rev Position010 Image 53_[ims1_2023-09-20T09-46-48.544].ims
1073		2	Image 1	109	AZ DAPI.icsx_[ibrx_2023-09-20T09-46-48.544]	700001	33	AZ DAPI.icsx_[ibrx_2023-09-20T09-46-48.544]	700001	61223 PLA PARP1 HIF1A _ba_Hyp Rev Position010 Image 53_[ims1_2023-09-20T09-46-48.544].ims	/Users/mzglab_user/Desktop/esv/pla hif1a parp1 2023/imaris/hypoxia/reversine/61223 PLA PARP1 HIF1A _ba_Hyp Rev Position010 Image 53_[ims1_2023-09-20T09-46-48.544].ims
44900		2	Image 1	110	AZ DAPI.icsx_[ibrx_2023-09-20T09-46-48.544]	700001	34	AZ DAPI.icsx_[ibrx_2023-09-20T09-46-48.544]	700001	61223 PLA PARP1 HIF1A _ba_Hyp Rev Position010 Image 53_[ims1_2023-09-20T09-46-48.544].ims	/Users/mzglab_user/Desktop/esv/pla hif1a parp1 2023/imaris/hypoxia/reversine/61223 PLA PARP1 HIF1A _ba_Hyp Rev Position010 Image 53_[ims1_2023-09-20T09-46-48.544].ims
59700		2	Image 1	111	AZ DAPI.icsx_[ibrx_2023-09-20T09-46-48.544]	700001	35	AZ DAPI.icsx_[ibrx_2023-09-20T09-46-48.544]	700001	61223 PLA PARP1 HIF1A _ba_Hyp Rev Position010 Image 53_[ims1_2023-09-20T09-46-48.544].ims	/Users/mzglab_user/Desktop/esv/pla hif1a parp1 2023/imaris/hypoxia/reversine/61223 PLA PARP1 HIF1A _ba_Hyp Rev Position010 Image 53_[ims1_2023-09-20T09-46-48.544].ims
87700		2	Image 1	112	AZ DAPI.icsx_[ibrx_2023-09-20T09-46-48.544]	700001	36	AZ DAPI.icsx_[ibrx_2023-09-20T09-46-48.544]	700001	61223 PLA PARP1 HIF1A _ba_Hyp Rev Position010 Image 53_[ims1_2023-09-20T09-46-48.544].ims	/Users/mzglab_user/Desktop/esv/pla hif1a parp1 2023/imaris/hypoxia/reversine/61223 PLA PARP1 HIF1A _ba_Hyp Rev Position010 Image 53_[ims1_2023-09-20T09-46-48.544].ims
31500		2	Image 1	113	AZ DAPI.icsx_[ibrx_2023-09-20T09-46-48.544]	700001	45	AZ DAPI.icsx_[ibrx_2023-09-20T09-46-48.544]	700001	61223 PLA PARP1 HIF1A _ba_Hyp Rev Position010 Image 53_[ims1_2023-09-20T09-46-48.544].ims	/Users/mzglab_user/Desktop/esv/pla hif1a parp1 2023/imaris/hypoxia/reversine/61223 PLA PARP1 HIF1A _ba_Hyp Rev Position010 Image 53_[ims1_2023-09-20T09-46-48.544].ims
13200		2	Image 1	114	AZ DAPI.icsx_[ibrx_2023-09-20T09-46-48.544]	700001	50	AZ DAPI.icsx_[ibrx_2023-09-20T09-46-48.544]	700001	61223 PLA PARP1 HIF1A _ba_Hyp Rev Position010 Image 53_[ims1_2023-09-20T09-46-48.544].ims	/Users/mzglab_user/Desktop/esv/pla hif1a parp1 2023/imaris/hypoxia/reversine/61223 PLA PARP1 HIF1A _ba_Hyp Rev Position010 Image 53_[ims1_2023-09-20T09-46-48.544].ims
30600		2	Image 1	115	AZ DAPI.icsx_[ibrx_2023-09-20T09-46-48.544]	700001	51	AZ DAPI.icsx_[ibrx_2023-09-20T09-46-48.544]	700001	61223 PLA PARP1 HIF1A _ba_Hyp Rev Position010 Image 53_[ims1_2023-09-20T09-46-48.544].ims	/Users/mzglab_user/Desktop/esv/pla hif1a parp1 2023/imaris/hypoxia/reversine/61223 PLA PARP1 HIF1A _ba_Hyp Rev Position010 Image 53_[ims1_2023-09-20T09-46-48.544].ims
5440000		2	Image 1	116	AZ DAPI.icsx_[ibrx_2023-09-20T09-46-48.544]	700001	19	AZ DAPI.icsx_[ibrx_2023-09-20T09-46-48.544]	700001	61223 PLA PARP1 HIF1A _bb_Hyp Rev Position011 Image 54_[ims1_2023-09-20T09-46-48.544].ims	/Users/mzglab_user/Desktop/esv/pla hif1a parp1 2023/imaris/hypoxia/reversine/61223 PLA PARP1 HIF1A _bb_Hyp Rev Position011 Image 54_[ims1_2023-09-20T09-46-48.544].ims
2210000		2	Image 1	117	AZ DAPI.icsx_[ibrx_2023-09-20T09-46-48.544]	700001	26	AZ DAPI.icsx_[ibrx_2023-09-20T09-46-48.544]	700001	61223 PLA PARP1 HIF1A _bb_Hyp Rev Position011 Image 54_[ims1_2023-09-20T09-46-48.544].ims	/Users/mzglab_user/Desktop/esv/pla hif1a parp1 2023/imaris/hypoxia/reversine/61223 PLA PARP1 HIF1A _bb_Hyp Rev Position011 Image 54_[ims1_2023-09-20T09-46-48.544].ims
1840000		2	Image 1	118	AZ DAPI.icsx_[ibrx_2023-09-20T09-46-48.544]	700001	27	AZ DAPI.icsx_[ibrx_2023-09-20T09-46-48.544]	700001	61223 PLA PARP1 HIF1A _bb_Hyp Rev Position011 Image 54_[ims1_2023-09-20T09-46-48.544].ims	/Users/mzglab_user/Desktop/esv/pla hif1a parp1 2023/imaris/hypoxia/reversine/61223 PLA PARP1 HIF1A _bb_Hyp Rev Position011 Image 54_[ims1_2023-09-20T09-46-48.544].ims
1410000		2	Image 1	119	AZ DAPI.icsx_[ibrx_2023-09-20T09-46-48.544]	700001	28	AZ DAPI.icsx_[ibrx_2023-09-20T09-46-48.544]	700001	61223 PLA PARP1 HIF1A _bb_Hyp Rev Position011 Image 54_[ims1_2023-09-20T09-46-48.544].ims	/Users/mzglab_user/Desktop/esv/pla hif1a parp1 2023/imaris/hypoxia/reversine/61223 PLA PARP1 HIF1A _bb_Hyp Rev Position011 Image 54_[ims1_2023-09-20T09-46-48.544].ims
2170000		2	Image 1	120	AZ DAPI.icsx_[ibrx_2023-09-20T09-46-48.544]	700001	31	AZ DAPI.icsx_[ibrx_2023-09-20T09-46-48.544]	700001	61223 PLA PARP1 HIF1A _bb_Hyp Rev Position011 Image 54_[ims1_2023-09-20T09-46-48.544].ims	/Users/mzglab_user/Desktop/esv/pla hif1a parp1 2023/imaris/hypoxia/reversine/61223 PLA PARP1 HIF1A _bb_Hyp Rev Position011 Image 54_[ims1_2023-09-20T09-46-48.544].ims
2800000		2	Image 1	121	AZ DAPI.icsx_[ibrx_2023-09-20T09-46-48.544]	700001	35	AZ DAPI.icsx_[ibrx_2023-09-20T09-46-48.544]	700001	61223 PLA PARP1 HIF1A _bb_Hyp Rev Position011 Image 54_[ims1_2023-09-20T09-46-48.544].ims	/Users/mzglab_user/Desktop/esv/pla hif1a parp1 2023/imaris/hypoxia/reversine/61223 PLA PARP1 HIF1A _bb_Hyp Rev Position011 Image 54_[ims1_2023-09-20T09-46-48.544].ims
3110000		2	Image 1	122	AZ DAPI.icsx_[ibrx_2023-09-20T09-46-48.544]	700001	39	AZ DAPI.icsx_[ibrx_2023-09-20T09-46-48.544]	700001	61223 PLA PARP1 HIF1A _bb_Hyp Rev Position011 Image 54_[ims1_2023-09-20T09-46-48.544].ims	/Users/mzglab_user/Desktop/esv/pla hif1a parp1 2023/imaris/hypoxia/reversine/61223 PLA PARP1 HIF1A _bb_Hyp Rev Position011 Image 54_[ims1_2023-09-20T09-46-48.544].ims
