# Supplementary material for: HIF1A-mediated pathways promote euploid cell survival in chromosomally mosaic embryos
Source: eLife. 2025 Oct 14;13:RP101912. doi: 10.7554/eLife.101912 (PMC12520657; doi:10.7554/eLife.101912)
Supplement: Figure 3—source data 5. [file elife-101912-fig3-data5.xls]

## Sheet: Scatter Plot 1D
Scatter Plot 1D
Intensity Sum Ch=2 Img=1	Unit	Channel	Image	ID	Surpass Object	Surpass Object Data ID	Original ID	Original Component Name	Original Component ID	Original Image Name	Original Image ID
780000		2	Image 1	3	AZ DAPI.icsx_[ibrx_2023-09-20T09-43-05.611]	700001	3	AZ DAPI.icsx_[ibrx_2023-09-20T09-43-05.611]	700001	61223 PLA PARP1 HIF1A _bv_Hyp DMSO Position001 Image 74_[ims1_2023-09-20T09-43-05.611].ims	/Users/mzglab_user/Desktop/esv/pla hif1a parp1 2023/imaris/hypoxia/DMSO/61223 PLA PARP1 HIF1A _bv_Hyp DMSO Position001 Image 74_[ims1_2023-09-20T09-43-05.611].ims
2450000		2	Image 1	6	AZ DAPI.icsx_[ibrx_2023-09-20T09-43-05.611]	700001	6	AZ DAPI.icsx_[ibrx_2023-09-20T09-43-05.611]	700001	61223 PLA PARP1 HIF1A _bv_Hyp DMSO Position001 Image 74_[ims1_2023-09-20T09-43-05.611].ims	/Users/mzglab_user/Desktop/esv/pla hif1a parp1 2023/imaris/hypoxia/DMSO/61223 PLA PARP1 HIF1A _bv_Hyp DMSO Position001 Image 74_[ims1_2023-09-20T09-43-05.611].ims
1050000		2	Image 1	10	AZ DAPI.icsx_[ibrx_2023-09-20T09-43-05.611]	700001	10	AZ DAPI.icsx_[ibrx_2023-09-20T09-43-05.611]	700001	61223 PLA PARP1 HIF1A _bv_Hyp DMSO Position001 Image 74_[ims1_2023-09-20T09-43-05.611].ims	/Users/mzglab_user/Desktop/esv/pla hif1a parp1 2023/imaris/hypoxia/DMSO/61223 PLA PARP1 HIF1A _bv_Hyp DMSO Position001 Image 74_[ims1_2023-09-20T09-43-05.611].ims
1860000		2	Image 1	11	AZ DAPI.icsx_[ibrx_2023-09-20T09-43-05.611]	700001	11	AZ DAPI.icsx_[ibrx_2023-09-20T09-43-05.611]	700001	61223 PLA PARP1 HIF1A _bv_Hyp DMSO Position001 Image 74_[ims1_2023-09-20T09-43-05.611].ims	/Users/mzglab_user/Desktop/esv/pla hif1a parp1 2023/imaris/hypoxia/DMSO/61223 PLA PARP1 HIF1A _bv_Hyp DMSO Position001 Image 74_[ims1_2023-09-20T09-43-05.611].ims
699000		2	Image 1	17	AZ DAPI.icsx_[ibrx_2023-09-20T09-43-05.611]	700001	17	AZ DAPI.icsx_[ibrx_2023-09-20T09-43-05.611]	700001	61223 PLA PARP1 HIF1A _bv_Hyp DMSO Position001 Image 74_[ims1_2023-09-20T09-43-05.611].ims	/Users/mzglab_user/Desktop/esv/pla hif1a parp1 2023/imaris/hypoxia/DMSO/61223 PLA PARP1 HIF1A _bv_Hyp DMSO Position001 Image 74_[ims1_2023-09-20T09-43-05.611].ims
2730000		2	Image 1	18	AZ DAPI.icsx_[ibrx_2023-09-20T09-43-05.611]	700001	18	AZ DAPI.icsx_[ibrx_2023-09-20T09-43-05.611]	700001	61223 PLA PARP1 HIF1A _bv_Hyp DMSO Position001 Image 74_[ims1_2023-09-20T09-43-05.611].ims	/Users/mzglab_user/Desktop/esv/pla hif1a parp1 2023/imaris/hypoxia/DMSO/61223 PLA PARP1 HIF1A _bv_Hyp DMSO Position001 Image 74_[ims1_2023-09-20T09-43-05.611].ims
1170000		2	Image 1	20	AZ DAPI.icsx_[ibrx_2023-09-20T09-43-05.611]	700001	20	AZ DAPI.icsx_[ibrx_2023-09-20T09-43-05.611]	700001	61223 PLA PARP1 HIF1A _bv_Hyp DMSO Position001 Image 74_[ims1_2023-09-20T09-43-05.611].ims	/Users/mzglab_user/Desktop/esv/pla hif1a parp1 2023/imaris/hypoxia/DMSO/61223 PLA PARP1 HIF1A _bv_Hyp DMSO Position001 Image 74_[ims1_2023-09-20T09-43-05.611].ims
2140000		2	Image 1	21	AZ DAPI.icsx_[ibrx_2023-09-20T09-43-05.611]	700001	21	AZ DAPI.icsx_[ibrx_2023-09-20T09-43-05.611]	700001	61223 PLA PARP1 HIF1A _bv_Hyp DMSO Position001 Image 74_[ims1_2023-09-20T09-43-05.611].ims	/Users/mzglab_user/Desktop/esv/pla hif1a parp1 2023/imaris/hypoxia/DMSO/61223 PLA PARP1 HIF1A _bv_Hyp DMSO Position001 Image 74_[ims1_2023-09-20T09-43-05.611].ims
789000		2	Image 1	22	AZ DAPI.icsx_[ibrx_2023-09-20T09-43-05.611]	700001	1	AZ DAPI.icsx_[ibrx_2023-09-20T09-43-05.611]	700001	61223 PLA PARP1 HIF1A _bw_Hyp DMSO Position002 Image 75_[ims1_2023-09-20T09-43-05.611].ims	/Users/mzglab_user/Desktop/esv/pla hif1a parp1 2023/imaris/hypoxia/DMSO/61223 PLA PARP1 HIF1A _bw_Hyp DMSO Position002 Image 75_[ims1_2023-09-20T09-43-05.611].ims
1180000		2	Image 1	23	AZ DAPI.icsx_[ibrx_2023-09-20T09-43-05.611]	700001	2	AZ DAPI.icsx_[ibrx_2023-09-20T09-43-05.611]	700001	61223 PLA PARP1 HIF1A _bw_Hyp DMSO Position002 Image 75_[ims1_2023-09-20T09-43-05.611].ims	/Users/mzglab_user/Desktop/esv/pla hif1a parp1 2023/imaris/hypoxia/DMSO/61223 PLA PARP1 HIF1A _bw_Hyp DMSO Position002 Image 75_[ims1_2023-09-20T09-43-05.611].ims
1360000		2	Image 1	24	AZ DAPI.icsx_[ibrx_2023-09-20T09-43-05.611]	700001	3	AZ DAPI.icsx_[ibrx_2023-09-20T09-43-05.611]	700001	61223 PLA PARP1 HIF1A _bw_Hyp DMSO Position002 Image 75_[ims1_2023-09-20T09-43-05.611].ims	/Users/mzglab_user/Desktop/esv/pla hif1a parp1 2023/imaris/hypoxia/DMSO/61223 PLA PARP1 HIF1A _bw_Hyp DMSO Position002 Image 75_[ims1_2023-09-20T09-43-05.611].ims
2900000		2	Image 1	25	AZ DAPI.icsx_[ibrx_2023-09-20T09-43-05.611]	700001	4	AZ DAPI.icsx_[ibrx_2023-09-20T09-43-05.611]	700001	61223 PLA PARP1 HIF1A _bw_Hyp DMSO Position002 Image 75_[ims1_2023-09-20T09-43-05.611].ims	/Users/mzglab_user/Desktop/esv/pla hif1a parp1 2023/imaris/hypoxia/DMSO/61223 PLA PARP1 HIF1A _bw_Hyp DMSO Position002 Image 75_[ims1_2023-09-20T09-43-05.611].ims
1880000		2	Image 1	26	AZ DAPI.icsx_[ibrx_2023-09-20T09-43-05.611]	700001	5	AZ DAPI.icsx_[ibrx_2023-09-20T09-43-05.611]	700001	61223 PLA PARP1 HIF1A _bw_Hyp DMSO Position002 Image 75_[ims1_2023-09-20T09-43-05.611].ims	/Users/mzglab_user/Desktop/esv/pla hif1a parp1 2023/imaris/hypoxia/DMSO/61223 PLA PARP1 HIF1A _bw_Hyp DMSO Position002 Image 75_[ims1_2023-09-20T09-43-05.611].ims
3280000		2	Image 1	27	AZ DAPI.icsx_[ibrx_2023-09-20T09-43-05.611]	700001	7	AZ DAPI.icsx_[ibrx_2023-09-20T09-43-05.611]	700001	61223 PLA PARP1 HIF1A _bw_Hyp DMSO Position002 Image 75_[ims1_2023-09-20T09-43-05.611].ims	/Users/mzglab_user/Desktop/esv/pla hif1a parp1 2023/imaris/hypoxia/DMSO/61223 PLA PARP1 HIF1A _bw_Hyp DMSO Position002 Image 75_[ims1_2023-09-20T09-43-05.611].ims
2990000		2	Image 1	28	AZ DAPI.icsx_[ibrx_2023-09-20T09-43-05.611]	700001	8	AZ DAPI.icsx_[ibrx_2023-09-20T09-43-05.611]	700001	61223 PLA PARP1 HIF1A _bw_Hyp DMSO Position002 Image 75_[ims1_2023-09-20T09-43-05.611].ims	/Users/mzglab_user/Desktop/esv/pla hif1a parp1 2023/imaris/hypoxia/DMSO/61223 PLA PARP1 HIF1A _bw_Hyp DMSO Position002 Image 75_[ims1_2023-09-20T09-43-05.611].ims
2220000		2	Image 1	29	AZ DAPI.icsx_[ibrx_2023-09-20T09-43-05.611]	700001	10	AZ DAPI.icsx_[ibrx_2023-09-20T09-43-05.611]	700001	61223 PLA PARP1 HIF1A _bw_Hyp DMSO Position002 Image 75_[ims1_2023-09-20T09-43-05.611].ims	/Users/mzglab_user/Desktop/esv/pla hif1a parp1 2023/imaris/hypoxia/DMSO/61223 PLA PARP1 HIF1A _bw_Hyp DMSO Position002 Image 75_[ims1_2023-09-20T09-43-05.611].ims
26000		2	Image 1	30	AZ DAPI.icsx_[ibrx_2023-09-20T09-43-05.611]	700001	9	AZ DAPI.icsx_[ibrx_2023-09-20T09-43-05.611]	700001	61223 PLA PARP1 HIF1A _bx_Hyp DMSO Position003 Image 76_[ims1_2023-09-20T09-43-05.611].ims	/Users/mzglab_user/Desktop/esv/pla hif1a parp1 2023/imaris/hypoxia/DMSO/61223 PLA PARP1 HIF1A _bx_Hyp DMSO Position003 Image 76_[ims1_2023-09-20T09-43-05.611].ims
1240000		2	Image 1	31	AZ DAPI.icsx_[ibrx_2023-09-20T09-43-05.611]	700001	11	AZ DAPI.icsx_[ibrx_2023-09-20T09-43-05.611]	700001	61223 PLA PARP1 HIF1A _bx_Hyp DMSO Position003 Image 76_[ims1_2023-09-20T09-43-05.611].ims	/Users/mzglab_user/Desktop/esv/pla hif1a parp1 2023/imaris/hypoxia/DMSO/61223 PLA PARP1 HIF1A _bx_Hyp DMSO Position003 Image 76_[ims1_2023-09-20T09-43-05.611].ims
2267		2	Image 1	32	AZ DAPI.icsx_[ibrx_2023-09-20T09-43-05.611]	700001	16	AZ DAPI.icsx_[ibrx_2023-09-20T09-43-05.611]	700001	61223 PLA PARP1 HIF1A _bx_Hyp DMSO Position003 Image 76_[ims1_2023-09-20T09-43-05.611].ims	/Users/mzglab_user/Desktop/esv/pla hif1a parp1 2023/imaris/hypoxia/DMSO/61223 PLA PARP1 HIF1A _bx_Hyp DMSO Position003 Image 76_[ims1_2023-09-20T09-43-05.611].ims
634000		2	Image 1	33	AZ DAPI.icsx_[ibrx_2023-09-20T09-43-05.611]	700001	18	AZ DAPI.icsx_[ibrx_2023-09-20T09-43-05.611]	700001	61223 PLA PARP1 HIF1A _bx_Hyp DMSO Position003 Image 76_[ims1_2023-09-20T09-43-05.611].ims	/Users/mzglab_user/Desktop/esv/pla hif1a parp1 2023/imaris/hypoxia/DMSO/61223 PLA PARP1 HIF1A _bx_Hyp DMSO Position003 Image 76_[ims1_2023-09-20T09-43-05.611].ims
5981		2	Image 1	34	AZ DAPI.icsx_[ibrx_2023-09-20T09-43-05.611]	700001	19	AZ DAPI.icsx_[ibrx_2023-09-20T09-43-05.611]	700001	61223 PLA PARP1 HIF1A _bx_Hyp DMSO Position003 Image 76_[ims1_2023-09-20T09-43-05.611].ims	/Users/mzglab_user/Desktop/esv/pla hif1a parp1 2023/imaris/hypoxia/DMSO/61223 PLA PARP1 HIF1A _bx_Hyp DMSO Position003 Image 76_[ims1_2023-09-20T09-43-05.611].ims
573000		2	Image 1	35	AZ DAPI.icsx_[ibrx_2023-09-20T09-43-05.611]	700001	22	AZ DAPI.icsx_[ibrx_2023-09-20T09-43-05.611]	700001	61223 PLA PARP1 HIF1A _bx_Hyp DMSO Position003 Image 76_[ims1_2023-09-20T09-43-05.611].ims	/Users/mzglab_user/Desktop/esv/pla hif1a parp1 2023/imaris/hypoxia/DMSO/61223 PLA PARP1 HIF1A _bx_Hyp DMSO Position003 Image 76_[ims1_2023-09-20T09-43-05.611].ims
616000		2	Image 1	36	AZ DAPI.icsx_[ibrx_2023-09-20T09-43-05.611]	700001	35	AZ DAPI.icsx_[ibrx_2023-09-20T09-43-05.611]	700001	61223 PLA PARP1 HIF1A _bx_Hyp DMSO Position003 Image 76_[ims1_2023-09-20T09-43-05.611].ims	/Users/mzglab_user/Desktop/esv/pla hif1a parp1 2023/imaris/hypoxia/DMSO/61223 PLA PARP1 HIF1A _bx_Hyp DMSO Position003 Image 76_[ims1_2023-09-20T09-43-05.611].ims
939000		2	Image 1	37	AZ DAPI.icsx_[ibrx_2023-09-20T09-43-05.611]	700001	38	AZ DAPI.icsx_[ibrx_2023-09-20T09-43-05.611]	700001	61223 PLA PARP1 HIF1A _bx_Hyp DMSO Position003 Image 76_[ims1_2023-09-20T09-43-05.611].ims	/Users/mzglab_user/Desktop/esv/pla hif1a parp1 2023/imaris/hypoxia/DMSO/61223 PLA PARP1 HIF1A _bx_Hyp DMSO Position003 Image 76_[ims1_2023-09-20T09-43-05.611].ims
506000		2	Image 1	38	AZ DAPI.icsx_[ibrx_2023-09-20T09-43-05.611]	700001	4	AZ DAPI.icsx_[ibrx_2023-09-20T09-43-05.611]	700001	61223 PLA PARP1 HIF1A _by_Hyp DMSO Position004 Image 77_[ims1_2023-09-20T09-43-05.611].ims	/Users/mzglab_user/Desktop/esv/pla hif1a parp1 2023/imaris/hypoxia/DMSO/61223 PLA PARP1 HIF1A _by_Hyp DMSO Position004 Image 77_[ims1_2023-09-20T09-43-05.611].ims
130000		2	Image 1	39	AZ DAPI.icsx_[ibrx_2023-09-20T09-43-05.611]	700001	6	AZ DAPI.icsx_[ibrx_2023-09-20T09-43-05.611]	700001	61223 PLA PARP1 HIF1A _by_Hyp DMSO Position004 Image 77_[ims1_2023-09-20T09-43-05.611].ims	/Users/mzglab_user/Desktop/esv/pla hif1a parp1 2023/imaris/hypoxia/DMSO/61223 PLA PARP1 HIF1A _by_Hyp DMSO Position004 Image 77_[ims1_2023-09-20T09-43-05.611].ims
798000		2	Image 1	40	AZ DAPI.icsx_[ibrx_2023-09-20T09-43-05.611]	700001	8	AZ DAPI.icsx_[ibrx_2023-09-20T09-43-05.611]	700001	61223 PLA PARP1 HIF1A _by_Hyp DMSO Position004 Image 77_[ims1_2023-09-20T09-43-05.611].ims	/Users/mzglab_user/Desktop/esv/pla hif1a parp1 2023/imaris/hypoxia/DMSO/61223 PLA PARP1 HIF1A _by_Hyp DMSO Position004 Image 77_[ims1_2023-09-20T09-43-05.611].ims
218000		2	Image 1	41	AZ DAPI.icsx_[ibrx_2023-09-20T09-43-05.611]	700001	9	AZ DAPI.icsx_[ibrx_2023-09-20T09-43-05.611]	700001	61223 PLA PARP1 HIF1A _by_Hyp DMSO Position004 Image 77_[ims1_2023-09-20T09-43-05.611].ims	/Users/mzglab_user/Desktop/esv/pla hif1a parp1 2023/imaris/hypoxia/DMSO/61223 PLA PARP1 HIF1A _by_Hyp DMSO Position004 Image 77_[ims1_2023-09-20T09-43-05.611].ims
399000		2	Image 1	42	AZ DAPI.icsx_[ibrx_2023-09-20T09-43-05.611]	700001	11	AZ DAPI.icsx_[ibrx_2023-09-20T09-43-05.611]	700001	61223 PLA PARP1 HIF1A _by_Hyp DMSO Position004 Image 77_[ims1_2023-09-20T09-43-05.611].ims	/Users/mzglab_user/Desktop/esv/pla hif1a parp1 2023/imaris/hypoxia/DMSO/61223 PLA PARP1 HIF1A _by_Hyp DMSO Position004 Image 77_[ims1_2023-09-20T09-43-05.611].ims
125000		2	Image 1	43	AZ DAPI.icsx_[ibrx_2023-09-20T09-43-05.611]	700001	12	AZ DAPI.icsx_[ibrx_2023-09-20T09-43-05.611]	700001	61223 PLA PARP1 HIF1A _by_Hyp DMSO Position004 Image 77_[ims1_2023-09-20T09-43-05.611].ims	/Users/mzglab_user/Desktop/esv/pla hif1a parp1 2023/imaris/hypoxia/DMSO/61223 PLA PARP1 HIF1A _by_Hyp DMSO Position004 Image 77_[ims1_2023-09-20T09-43-05.611].ims
496000		2	Image 1	44	AZ DAPI.icsx_[ibrx_2023-09-20T09-43-05.611]	700001	13	AZ DAPI.icsx_[ibrx_2023-09-20T09-43-05.611]	700001	61223 PLA PARP1 HIF1A _by_Hyp DMSO Position004 Image 77_[ims1_2023-09-20T09-43-05.611].ims	/Users/mzglab_user/Desktop/esv/pla hif1a parp1 2023/imaris/hypoxia/DMSO/61223 PLA PARP1 HIF1A _by_Hyp DMSO Position004 Image 77_[ims1_2023-09-20T09-43-05.611].ims
680000		2	Image 1	45	AZ DAPI.icsx_[ibrx_2023-09-20T09-43-05.611]	700001	19	AZ DAPI.icsx_[ibrx_2023-09-20T09-43-05.611]	700001	61223 PLA PARP1 HIF1A _by_Hyp DMSO Position004 Image 77_[ims1_2023-09-20T09-43-05.611].ims	/Users/mzglab_user/Desktop/esv/pla hif1a parp1 2023/imaris/hypoxia/DMSO/61223 PLA PARP1 HIF1A _by_Hyp DMSO Position004 Image 77_[ims1_2023-09-20T09-43-05.611].ims
660000		2	Image 1	46	AZ DAPI.icsx_[ibrx_2023-09-20T09-43-05.611]	700001	0	AZ DAPI.icsx_[ibrx_2023-09-20T09-43-05.611]	700001	61223 PLA PARP1 HIF1A _bz_Hyp DMSO Position005 Image 78_[ims1_2023-09-20T09-43-05.611].ims	/Users/mzglab_user/Desktop/esv/pla hif1a parp1 2023/imaris/hypoxia/DMSO/61223 PLA PARP1 HIF1A _bz_Hyp DMSO Position005 Image 78_[ims1_2023-09-20T09-43-05.611].ims
2140000		2	Image 1	47	AZ DAPI.icsx_[ibrx_2023-09-20T09-43-05.611]	700001	5	AZ DAPI.icsx_[ibrx_2023-09-20T09-43-05.611]	700001	61223 PLA PARP1 HIF1A _bz_Hyp DMSO Position005 Image 78_[ims1_2023-09-20T09-43-05.611].ims	/Users/mzglab_user/Desktop/esv/pla hif1a parp1 2023/imaris/hypoxia/DMSO/61223 PLA PARP1 HIF1A _bz_Hyp DMSO Position005 Image 78_[ims1_2023-09-20T09-43-05.611].ims
770000		2	Image 1	48	AZ DAPI.icsx_[ibrx_2023-09-20T09-43-05.611]	700001	6	AZ DAPI.icsx_[ibrx_2023-09-20T09-43-05.611]	700001	61223 PLA PARP1 HIF1A _bz_Hyp DMSO Position005 Image 78_[ims1_2023-09-20T09-43-05.611].ims	/Users/mzglab_user/Desktop/esv/pla hif1a parp1 2023/imaris/hypoxia/DMSO/61223 PLA PARP1 HIF1A _bz_Hyp DMSO Position005 Image 78_[ims1_2023-09-20T09-43-05.611].ims
31100		2	Image 1	49	AZ DAPI.icsx_[ibrx_2023-09-20T09-43-05.611]	700001	7	AZ DAPI.icsx_[ibrx_2023-09-20T09-43-05.611]	700001	61223 PLA PARP1 HIF1A _bz_Hyp DMSO Position005 Image 78_[ims1_2023-09-20T09-43-05.611].ims	/Users/mzglab_user/Desktop/esv/pla hif1a parp1 2023/imaris/hypoxia/DMSO/61223 PLA PARP1 HIF1A _bz_Hyp DMSO Position005 Image 78_[ims1_2023-09-20T09-43-05.611].ims
48400		2	Image 1	50	AZ DAPI.icsx_[ibrx_2023-09-20T09-43-05.611]	700001	9	AZ DAPI.icsx_[ibrx_2023-09-20T09-43-05.611]	700001	61223 PLA PARP1 HIF1A _bz_Hyp DMSO Position005 Image 78_[ims1_2023-09-20T09-43-05.611].ims	/Users/mzglab_user/Desktop/esv/pla hif1a parp1 2023/imaris/hypoxia/DMSO/61223 PLA PARP1 HIF1A _bz_Hyp DMSO Position005 Image 78_[ims1_2023-09-20T09-43-05.611].ims
1150000		2	Image 1	51	AZ DAPI.icsx_[ibrx_2023-09-20T09-43-05.611]	700001	13	AZ DAPI.icsx_[ibrx_2023-09-20T09-43-05.611]	700001	61223 PLA PARP1 HIF1A _bz_Hyp DMSO Position005 Image 78_[ims1_2023-09-20T09-43-05.611].ims	/Users/mzglab_user/Desktop/esv/pla hif1a parp1 2023/imaris/hypoxia/DMSO/61223 PLA PARP1 HIF1A _bz_Hyp DMSO Position005 Image 78_[ims1_2023-09-20T09-43-05.611].ims
304000		2	Image 1	52	AZ DAPI.icsx_[ibrx_2023-09-20T09-43-05.611]	700001	23	AZ DAPI.icsx_[ibrx_2023-09-20T09-43-05.611]	700001	61223 PLA PARP1 HIF1A _bz_Hyp DMSO Position005 Image 78_[ims1_2023-09-20T09-43-05.611].ims	/Users/mzglab_user/Desktop/esv/pla hif1a parp1 2023/imaris/hypoxia/DMSO/61223 PLA PARP1 HIF1A _bz_Hyp DMSO Position005 Image 78_[ims1_2023-09-20T09-43-05.611].ims
83100		2	Image 1	53	AZ DAPI.icsx_[ibrx_2023-09-20T09-43-05.611]	700001	25	AZ DAPI.icsx_[ibrx_2023-09-20T09-43-05.611]	700001	61223 PLA PARP1 HIF1A _bz_Hyp DMSO Position005 Image 78_[ims1_2023-09-20T09-43-05.611].ims	/Users/mzglab_user/Desktop/esv/pla hif1a parp1 2023/imaris/hypoxia/DMSO/61223 PLA PARP1 HIF1A _bz_Hyp DMSO Position005 Image 78_[ims1_2023-09-20T09-43-05.611].ims
2260000		2	Image 1	54	AZ DAPI.icsx_[ibrx_2023-09-20T09-43-05.611]	700001	13	AZ DAPI.icsx_[ibrx_2023-09-20T09-43-05.611]	700001	61223 PLA PARP1 HIF1A _ca_Hyp DMSO Position006 Image 79_[ims1_2023-09-20T09-43-05.611].ims	/Users/mzglab_user/Desktop/esv/pla hif1a parp1 2023/imaris/hypoxia/DMSO/61223 PLA PARP1 HIF1A _ca_Hyp DMSO Position006 Image 79_[ims1_2023-09-20T09-43-05.611].ims
547000		2	Image 1	55	AZ DAPI.icsx_[ibrx_2023-09-20T09-43-05.611]	700001	17	AZ DAPI.icsx_[ibrx_2023-09-20T09-43-05.611]	700001	61223 PLA PARP1 HIF1A _ca_Hyp DMSO Position006 Image 79_[ims1_2023-09-20T09-43-05.611].ims	/Users/mzglab_user/Desktop/esv/pla hif1a parp1 2023/imaris/hypoxia/DMSO/61223 PLA PARP1 HIF1A _ca_Hyp DMSO Position006 Image 79_[ims1_2023-09-20T09-43-05.611].ims
105000		2	Image 1	56	AZ DAPI.icsx_[ibrx_2023-09-20T09-43-05.611]	700001	28	AZ DAPI.icsx_[ibrx_2023-09-20T09-43-05.611]	700001	61223 PLA PARP1 HIF1A _ca_Hyp DMSO Position006 Image 79_[ims1_2023-09-20T09-43-05.611].ims	/Users/mzglab_user/Desktop/esv/pla hif1a parp1 2023/imaris/hypoxia/DMSO/61223 PLA PARP1 HIF1A _ca_Hyp DMSO Position006 Image 79_[ims1_2023-09-20T09-43-05.611].ims
121000		2	Image 1	57	AZ DAPI.icsx_[ibrx_2023-09-20T09-43-05.611]	700001	30	AZ DAPI.icsx_[ibrx_2023-09-20T09-43-05.611]	700001	61223 PLA PARP1 HIF1A _ca_Hyp DMSO Position006 Image 79_[ims1_2023-09-20T09-43-05.611].ims	/Users/mzglab_user/Desktop/esv/pla hif1a parp1 2023/imaris/hypoxia/DMSO/61223 PLA PARP1 HIF1A _ca_Hyp DMSO Position006 Image 79_[ims1_2023-09-20T09-43-05.611].ims
143000		2	Image 1	58	AZ DAPI.icsx_[ibrx_2023-09-20T09-43-05.611]	700001	38	AZ DAPI.icsx_[ibrx_2023-09-20T09-43-05.611]	700001	61223 PLA PARP1 HIF1A _ca_Hyp DMSO Position006 Image 79_[ims1_2023-09-20T09-43-05.611].ims	/Users/mzglab_user/Desktop/esv/pla hif1a parp1 2023/imaris/hypoxia/DMSO/61223 PLA PARP1 HIF1A _ca_Hyp DMSO Position006 Image 79_[ims1_2023-09-20T09-43-05.611].ims
15500		2	Image 1	59	AZ DAPI.icsx_[ibrx_2023-09-20T09-43-05.611]	700001	40	AZ DAPI.icsx_[ibrx_2023-09-20T09-43-05.611]	700001	61223 PLA PARP1 HIF1A _ca_Hyp DMSO Position006 Image 79_[ims1_2023-09-20T09-43-05.611].ims	/Users/mzglab_user/Desktop/esv/pla hif1a parp1 2023/imaris/hypoxia/DMSO/61223 PLA PARP1 HIF1A _ca_Hyp DMSO Position006 Image 79_[ims1_2023-09-20T09-43-05.611].ims
183000		2	Image 1	60	AZ DAPI.icsx_[ibrx_2023-09-20T09-43-05.611]	700001	54	AZ DAPI.icsx_[ibrx_2023-09-20T09-43-05.611]	700001	61223 PLA PARP1 HIF1A _ca_Hyp DMSO Position006 Image 79_[ims1_2023-09-20T09-43-05.611].ims	/Users/mzglab_user/Desktop/esv/pla hif1a parp1 2023/imaris/hypoxia/DMSO/61223 PLA PARP1 HIF1A _ca_Hyp DMSO Position006 Image 79_[ims1_2023-09-20T09-43-05.611].ims
5118		2	Image 1	61	AZ DAPI.icsx_[ibrx_2023-09-20T09-43-05.611]	700001	61	AZ DAPI.icsx_[ibrx_2023-09-20T09-43-05.611]	700001	61223 PLA PARP1 HIF1A _ca_Hyp DMSO Position006 Image 79_[ims1_2023-09-20T09-43-05.611].ims	/Users/mzglab_user/Desktop/esv/pla hif1a parp1 2023/imaris/hypoxia/DMSO/61223 PLA PARP1 HIF1A _ca_Hyp DMSO Position006 Image 79_[ims1_2023-09-20T09-43-05.611].ims
0		2	Image 1	62	AZ DAPI.icsx_[ibrx_2023-09-20T09-43-05.611]	700001	7	AZ DAPI.icsx_[ibrx_2023-09-20T09-43-05.611]	700001	61223 PLA PARP1 HIF1A _cb_Hyp DMSO Position007 Image 80_[ims1_2023-09-20T09-43-05.611].ims	/Users/mzglab_user/Desktop/esv/pla hif1a parp1 2023/imaris/hypoxia/DMSO/61223 PLA PARP1 HIF1A _cb_Hyp DMSO Position007 Image 80_[ims1_2023-09-20T09-43-05.611].ims
0		2	Image 1	63	AZ DAPI.icsx_[ibrx_2023-09-20T09-43-05.611]	700001	8	AZ DAPI.icsx_[ibrx_2023-09-20T09-43-05.611]	700001	61223 PLA PARP1 HIF1A _cb_Hyp DMSO Position007 Image 80_[ims1_2023-09-20T09-43-05.611].ims	/Users/mzglab_user/Desktop/esv/pla hif1a parp1 2023/imaris/hypoxia/DMSO/61223 PLA PARP1 HIF1A _cb_Hyp DMSO Position007 Image 80_[ims1_2023-09-20T09-43-05.611].ims
13600		2	Image 1	64	AZ DAPI.icsx_[ibrx_2023-09-20T09-43-05.611]	700001	10	AZ DAPI.icsx_[ibrx_2023-09-20T09-43-05.611]	700001	61223 PLA PARP1 HIF1A _cb_Hyp DMSO Position007 Image 80_[ims1_2023-09-20T09-43-05.611].ims	/Users/mzglab_user/Desktop/esv/pla hif1a parp1 2023/imaris/hypoxia/DMSO/61223 PLA PARP1 HIF1A _cb_Hyp DMSO Position007 Image 80_[ims1_2023-09-20T09-43-05.611].ims
0		2	Image 1	65	AZ DAPI.icsx_[ibrx_2023-09-20T09-43-05.611]	700001	11	AZ DAPI.icsx_[ibrx_2023-09-20T09-43-05.611]	700001	61223 PLA PARP1 HIF1A _cb_Hyp DMSO Position007 Image 80_[ims1_2023-09-20T09-43-05.611].ims	/Users/mzglab_user/Desktop/esv/pla hif1a parp1 2023/imaris/hypoxia/DMSO/61223 PLA PARP1 HIF1A _cb_Hyp DMSO Position007 Image 80_[ims1_2023-09-20T09-43-05.611].ims
0		2	Image 1	66	AZ DAPI.icsx_[ibrx_2023-09-20T09-43-05.611]	700001	15	AZ DAPI.icsx_[ibrx_2023-09-20T09-43-05.611]	700001	61223 PLA PARP1 HIF1A _cb_Hyp DMSO Position007 Image 80_[ims1_2023-09-20T09-43-05.611].ims	/Users/mzglab_user/Desktop/esv/pla hif1a parp1 2023/imaris/hypoxia/DMSO/61223 PLA PARP1 HIF1A _cb_Hyp DMSO Position007 Image 80_[ims1_2023-09-20T09-43-05.611].ims
140		2	Image 1	67	AZ DAPI.icsx_[ibrx_2023-09-20T09-43-05.611]	700001	16	AZ DAPI.icsx_[ibrx_2023-09-20T09-43-05.611]	700001	61223 PLA PARP1 HIF1A _cb_Hyp DMSO Position007 Image 80_[ims1_2023-09-20T09-43-05.611].ims	/Users/mzglab_user/Desktop/esv/pla hif1a parp1 2023/imaris/hypoxia/DMSO/61223 PLA PARP1 HIF1A _cb_Hyp DMSO Position007 Image 80_[ims1_2023-09-20T09-43-05.611].ims
8301		2	Image 1	68	AZ DAPI.icsx_[ibrx_2023-09-20T09-43-05.611]	700001	24	AZ DAPI.icsx_[ibrx_2023-09-20T09-43-05.611]	700001	61223 PLA PARP1 HIF1A _cb_Hyp DMSO Position007 Image 80_[ims1_2023-09-20T09-43-05.611].ims	/Users/mzglab_user/Desktop/esv/pla hif1a parp1 2023/imaris/hypoxia/DMSO/61223 PLA PARP1 HIF1A _cb_Hyp DMSO Position007 Image 80_[ims1_2023-09-20T09-43-05.611].ims
38700		2	Image 1	69	AZ DAPI.icsx_[ibrx_2023-09-20T09-43-05.611]	700001	29	AZ DAPI.icsx_[ibrx_2023-09-20T09-43-05.611]	700001	61223 PLA PARP1 HIF1A _cb_Hyp DMSO Position007 Image 80_[ims1_2023-09-20T09-43-05.611].ims	/Users/mzglab_user/Desktop/esv/pla hif1a parp1 2023/imaris/hypoxia/DMSO/61223 PLA PARP1 HIF1A _cb_Hyp DMSO Position007 Image 80_[ims1_2023-09-20T09-43-05.611].ims
3084		2	Image 1	70	AZ DAPI.icsx_[ibrx_2023-09-20T09-43-05.611]	700001	0	AZ DAPI.icsx_[ibrx_2023-09-20T09-43-05.611]	700001	61223 PLA PARP1 HIF1A _cc_Hyp DMSO Position008 Image 81_[ims1_2023-09-20T09-43-05.611].ims	/Users/mzglab_user/Desktop/esv/pla hif1a parp1 2023/imaris/hypoxia/DMSO/61223 PLA PARP1 HIF1A _cc_Hyp DMSO Position008 Image 81_[ims1_2023-09-20T09-43-05.611].ims
272		2	Image 1	71	AZ DAPI.icsx_[ibrx_2023-09-20T09-43-05.611]	700001	1	AZ DAPI.icsx_[ibrx_2023-09-20T09-43-05.611]	700001	61223 PLA PARP1 HIF1A _cc_Hyp DMSO Position008 Image 81_[ims1_2023-09-20T09-43-05.611].ims	/Users/mzglab_user/Desktop/esv/pla hif1a parp1 2023/imaris/hypoxia/DMSO/61223 PLA PARP1 HIF1A _cc_Hyp DMSO Position008 Image 81_[ims1_2023-09-20T09-43-05.611].ims
616000		2	Image 1	72	AZ DAPI.icsx_[ibrx_2023-09-20T09-43-05.611]	700001	2	AZ DAPI.icsx_[ibrx_2023-09-20T09-43-05.611]	700001	61223 PLA PARP1 HIF1A _cc_Hyp DMSO Position008 Image 81_[ims1_2023-09-20T09-43-05.611].ims	/Users/mzglab_user/Desktop/esv/pla hif1a parp1 2023/imaris/hypoxia/DMSO/61223 PLA PARP1 HIF1A _cc_Hyp DMSO Position008 Image 81_[ims1_2023-09-20T09-43-05.611].ims
498000		2	Image 1	73	AZ DAPI.icsx_[ibrx_2023-09-20T09-43-05.611]	700001	3	AZ DAPI.icsx_[ibrx_2023-09-20T09-43-05.611]	700001	61223 PLA PARP1 HIF1A _cc_Hyp DMSO Position008 Image 81_[ims1_2023-09-20T09-43-05.611].ims	/Users/mzglab_user/Desktop/esv/pla hif1a parp1 2023/imaris/hypoxia/DMSO/61223 PLA PARP1 HIF1A _cc_Hyp DMSO Position008 Image 81_[ims1_2023-09-20T09-43-05.611].ims
668		2	Image 1	74	AZ DAPI.icsx_[ibrx_2023-09-20T09-43-05.611]	700001	6	AZ DAPI.icsx_[ibrx_2023-09-20T09-43-05.611]	700001	61223 PLA PARP1 HIF1A _cc_Hyp DMSO Position008 Image 81_[ims1_2023-09-20T09-43-05.611].ims	/Users/mzglab_user/Desktop/esv/pla hif1a parp1 2023/imaris/hypoxia/DMSO/61223 PLA PARP1 HIF1A _cc_Hyp DMSO Position008 Image 81_[ims1_2023-09-20T09-43-05.611].ims
0		2	Image 1	75	AZ DAPI.icsx_[ibrx_2023-09-20T09-43-05.611]	700001	8	AZ DAPI.icsx_[ibrx_2023-09-20T09-43-05.611]	700001	61223 PLA PARP1 HIF1A _cc_Hyp DMSO Position008 Image 81_[ims1_2023-09-20T09-43-05.611].ims	/Users/mzglab_user/Desktop/esv/pla hif1a parp1 2023/imaris/hypoxia/DMSO/61223 PLA PARP1 HIF1A _cc_Hyp DMSO Position008 Image 81_[ims1_2023-09-20T09-43-05.611].ims
11200		2	Image 1	76	AZ DAPI.icsx_[ibrx_2023-09-20T09-43-05.611]	700001	12	AZ DAPI.icsx_[ibrx_2023-09-20T09-43-05.611]	700001	61223 PLA PARP1 HIF1A _cc_Hyp DMSO Position008 Image 81_[ims1_2023-09-20T09-43-05.611].ims	/Users/mzglab_user/Desktop/esv/pla hif1a parp1 2023/imaris/hypoxia/DMSO/61223 PLA PARP1 HIF1A _cc_Hyp DMSO Position008 Image 81_[ims1_2023-09-20T09-43-05.611].ims
108000		2	Image 1	77	AZ DAPI.icsx_[ibrx_2023-09-20T09-43-05.611]	700001	15	AZ DAPI.icsx_[ibrx_2023-09-20T09-43-05.611]	700001	61223 PLA PARP1 HIF1A _cc_Hyp DMSO Position008 Image 81_[ims1_2023-09-20T09-43-05.611].ims	/Users/mzglab_user/Desktop/esv/pla hif1a parp1 2023/imaris/hypoxia/DMSO/61223 PLA PARP1 HIF1A _cc_Hyp DMSO Position008 Image 81_[ims1_2023-09-20T09-43-05.611].ims
182000		2	Image 1	78	AZ DAPI.icsx_[ibrx_2023-09-20T09-43-05.611]	700001	6	AZ DAPI.icsx_[ibrx_2023-09-20T09-43-05.611]	700001	61223 PLA PARP1 HIF1A _cd_Hyp DMSO Position009 Image 82_[ims1_2023-09-20T09-43-05.611].ims	/Users/mzglab_user/Desktop/esv/pla hif1a parp1 2023/imaris/hypoxia/DMSO/61223 PLA PARP1 HIF1A _cd_Hyp DMSO Position009 Image 82_[ims1_2023-09-20T09-43-05.611].ims
2005		2	Image 1	79	AZ DAPI.icsx_[ibrx_2023-09-20T09-43-05.611]	700001	7	AZ DAPI.icsx_[ibrx_2023-09-20T09-43-05.611]	700001	61223 PLA PARP1 HIF1A _cd_Hyp DMSO Position009 Image 82_[ims1_2023-09-20T09-43-05.611].ims	/Users/mzglab_user/Desktop/esv/pla hif1a parp1 2023/imaris/hypoxia/DMSO/61223 PLA PARP1 HIF1A _cd_Hyp DMSO Position009 Image 82_[ims1_2023-09-20T09-43-05.611].ims
59600		2	Image 1	80	AZ DAPI.icsx_[ibrx_2023-09-20T09-43-05.611]	700001	10	AZ DAPI.icsx_[ibrx_2023-09-20T09-43-05.611]	700001	61223 PLA PARP1 HIF1A _cd_Hyp DMSO Position009 Image 82_[ims1_2023-09-20T09-43-05.611].ims	/Users/mzglab_user/Desktop/esv/pla hif1a parp1 2023/imaris/hypoxia/DMSO/61223 PLA PARP1 HIF1A _cd_Hyp DMSO Position009 Image 82_[ims1_2023-09-20T09-43-05.611].ims
0		2	Image 1	81	AZ DAPI.icsx_[ibrx_2023-09-20T09-43-05.611]	700001	11	AZ DAPI.icsx_[ibrx_2023-09-20T09-43-05.611]	700001	61223 PLA PARP1 HIF1A _cd_Hyp DMSO Position009 Image 82_[ims1_2023-09-20T09-43-05.611].ims	/Users/mzglab_user/Desktop/esv/pla hif1a parp1 2023/imaris/hypoxia/DMSO/61223 PLA PARP1 HIF1A _cd_Hyp DMSO Position009 Image 82_[ims1_2023-09-20T09-43-05.611].ims
114000		2	Image 1	82	AZ DAPI.icsx_[ibrx_2023-09-20T09-43-05.611]	700001	15	AZ DAPI.icsx_[ibrx_2023-09-20T09-43-05.611]	700001	61223 PLA PARP1 HIF1A _cd_Hyp DMSO Position009 Image 82_[ims1_2023-09-20T09-43-05.611].ims	/Users/mzglab_user/Desktop/esv/pla hif1a parp1 2023/imaris/hypoxia/DMSO/61223 PLA PARP1 HIF1A _cd_Hyp DMSO Position009 Image 82_[ims1_2023-09-20T09-43-05.611].ims
137		2	Image 1	83	AZ DAPI.icsx_[ibrx_2023-09-20T09-43-05.611]	700001	17	AZ DAPI.icsx_[ibrx_2023-09-20T09-43-05.611]	700001	61223 PLA PARP1 HIF1A _cd_Hyp DMSO Position009 Image 82_[ims1_2023-09-20T09-43-05.611].ims	/Users/mzglab_user/Desktop/esv/pla hif1a parp1 2023/imaris/hypoxia/DMSO/61223 PLA PARP1 HIF1A _cd_Hyp DMSO Position009 Image 82_[ims1_2023-09-20T09-43-05.611].ims
0		2	Image 1	84	AZ DAPI.icsx_[ibrx_2023-09-20T09-43-05.611]	700001	24	AZ DAPI.icsx_[ibrx_2023-09-20T09-43-05.611]	700001	61223 PLA PARP1 HIF1A _cd_Hyp DMSO Position009 Image 82_[ims1_2023-09-20T09-43-05.611].ims	/Users/mzglab_user/Desktop/esv/pla hif1a parp1 2023/imaris/hypoxia/DMSO/61223 PLA PARP1 HIF1A _cd_Hyp DMSO Position009 Image 82_[ims1_2023-09-20T09-43-05.611].ims
180000		2	Image 1	85	AZ DAPI.icsx_[ibrx_2023-09-20T09-43-05.611]	700001	25	AZ DAPI.icsx_[ibrx_2023-09-20T09-43-05.611]	700001	61223 PLA PARP1 HIF1A _cd_Hyp DMSO Position009 Image 82_[ims1_2023-09-20T09-43-05.611].ims	/Users/mzglab_user/Desktop/esv/pla hif1a parp1 2023/imaris/hypoxia/DMSO/61223 PLA PARP1 HIF1A _cd_Hyp DMSO Position009 Image 82_[ims1_2023-09-20T09-43-05.611].ims
370000		2	Image 1	86	AZ DAPI.icsx_[ibrx_2023-09-20T09-43-05.611]	700001	6	AZ DAPI.icsx_[ibrx_2023-09-20T09-43-05.611]	700001	61223 PLA PARP1 HIF1A _ce_Hyp DMSO Position010 Image 83_[ims1_2023-09-20T09-43-05.611].ims	/Users/mzglab_user/Desktop/esv/pla hif1a parp1 2023/imaris/hypoxia/DMSO/61223 PLA PARP1 HIF1A _ce_Hyp DMSO Position010 Image 83_[ims1_2023-09-20T09-43-05.611].ims
76700		2	Image 1	87	AZ DAPI.icsx_[ibrx_2023-09-20T09-43-05.611]	700001	7	AZ DAPI.icsx_[ibrx_2023-09-20T09-43-05.611]	700001	61223 PLA PARP1 HIF1A _ce_Hyp DMSO Position010 Image 83_[ims1_2023-09-20T09-43-05.611].ims	/Users/mzglab_user/Desktop/esv/pla hif1a parp1 2023/imaris/hypoxia/DMSO/61223 PLA PARP1 HIF1A _ce_Hyp DMSO Position010 Image 83_[ims1_2023-09-20T09-43-05.611].ims
1160000		2	Image 1	88	AZ DAPI.icsx_[ibrx_2023-09-20T09-43-05.611]	700001	10	AZ DAPI.icsx_[ibrx_2023-09-20T09-43-05.611]	700001	61223 PLA PARP1 HIF1A _ce_Hyp DMSO Position010 Image 83_[ims1_2023-09-20T09-43-05.611].ims	/Users/mzglab_user/Desktop/esv/pla hif1a parp1 2023/imaris/hypoxia/DMSO/61223 PLA PARP1 HIF1A _ce_Hyp DMSO Position010 Image 83_[ims1_2023-09-20T09-43-05.611].ims
0		2	Image 1	89	AZ DAPI.icsx_[ibrx_2023-09-20T09-43-05.611]	700001	11	AZ DAPI.icsx_[ibrx_2023-09-20T09-43-05.611]	700001	61223 PLA PARP1 HIF1A _ce_Hyp DMSO Position010 Image 83_[ims1_2023-09-20T09-43-05.611].ims	/Users/mzglab_user/Desktop/esv/pla hif1a parp1 2023/imaris/hypoxia/DMSO/61223 PLA PARP1 HIF1A _ce_Hyp DMSO Position010 Image 83_[ims1_2023-09-20T09-43-05.611].ims
522000		2	Image 1	90	AZ DAPI.icsx_[ibrx_2023-09-20T09-43-05.611]	700001	13	AZ DAPI.icsx_[ibrx_2023-09-20T09-43-05.611]	700001	61223 PLA PARP1 HIF1A _ce_Hyp DMSO Position010 Image 83_[ims1_2023-09-20T09-43-05.611].ims	/Users/mzglab_user/Desktop/esv/pla hif1a parp1 2023/imaris/hypoxia/DMSO/61223 PLA PARP1 HIF1A _ce_Hyp DMSO Position010 Image 83_[ims1_2023-09-20T09-43-05.611].ims
4288		2	Image 1	91	AZ DAPI.icsx_[ibrx_2023-09-20T09-43-05.611]	700001	14	AZ DAPI.icsx_[ibrx_2023-09-20T09-43-05.611]	700001	61223 PLA PARP1 HIF1A _ce_Hyp DMSO Position010 Image 83_[ims1_2023-09-20T09-43-05.611].ims	/Users/mzglab_user/Desktop/esv/pla hif1a parp1 2023/imaris/hypoxia/DMSO/61223 PLA PARP1 HIF1A _ce_Hyp DMSO Position010 Image 83_[ims1_2023-09-20T09-43-05.611].ims
1320000		2	Image 1	92	AZ DAPI.icsx_[ibrx_2023-09-20T09-43-05.611]	700001	17	AZ DAPI.icsx_[ibrx_2023-09-20T09-43-05.611]	700001	61223 PLA PARP1 HIF1A _ce_Hyp DMSO Position010 Image 83_[ims1_2023-09-20T09-43-05.611].ims	/Users/mzglab_user/Desktop/esv/pla hif1a parp1 2023/imaris/hypoxia/DMSO/61223 PLA PARP1 HIF1A _ce_Hyp DMSO Position010 Image 83_[ims1_2023-09-20T09-43-05.611].ims
9101		2	Image 1	93	AZ DAPI.icsx_[ibrx_2023-09-20T09-43-05.611]	700001	18	AZ DAPI.icsx_[ibrx_2023-09-20T09-43-05.611]	700001	61223 PLA PARP1 HIF1A _ce_Hyp DMSO Position010 Image 83_[ims1_2023-09-20T09-43-05.611].ims	/Users/mzglab_user/Desktop/esv/pla hif1a parp1 2023/imaris/hypoxia/DMSO/61223 PLA PARP1 HIF1A _ce_Hyp DMSO Position010 Image 83_[ims1_2023-09-20T09-43-05.611].ims
575		2	Image 1	94	AZ DAPI.icsx_[ibrx_2023-09-20T09-43-05.611]	700001	6	AZ DAPI.icsx_[ibrx_2023-09-20T09-43-05.611]	700001	61223 PLA PARP1 HIF1A _cf_Hyp DMSO Position011 Image 84_[ims1_2023-09-20T09-43-05.611].ims	/Users/mzglab_user/Desktop/esv/pla hif1a parp1 2023/imaris/hypoxia/DMSO/61223 PLA PARP1 HIF1A _cf_Hyp DMSO Position011 Image 84_[ims1_2023-09-20T09-43-05.611].ims
0		2	Image 1	95	AZ DAPI.icsx_[ibrx_2023-09-20T09-43-05.611]	700001	7	AZ DAPI.icsx_[ibrx_2023-09-20T09-43-05.611]	700001	61223 PLA PARP1 HIF1A _cf_Hyp DMSO Position011 Image 84_[ims1_2023-09-20T09-43-05.611].ims	/Users/mzglab_user/Desktop/esv/pla hif1a parp1 2023/imaris/hypoxia/DMSO/61223 PLA PARP1 HIF1A _cf_Hyp DMSO Position011 Image 84_[ims1_2023-09-20T09-43-05.611].ims
6106		2	Image 1	96	AZ DAPI.icsx_[ibrx_2023-09-20T09-43-05.611]	700001	9	AZ DAPI.icsx_[ibrx_2023-09-20T09-43-05.611]	700001	61223 PLA PARP1 HIF1A _cf_Hyp DMSO Position011 Image 84_[ims1_2023-09-20T09-43-05.611].ims	/Users/mzglab_user/Desktop/esv/pla hif1a parp1 2023/imaris/hypoxia/DMSO/61223 PLA PARP1 HIF1A _cf_Hyp DMSO Position011 Image 84_[ims1_2023-09-20T09-43-05.611].ims
530000		2	Image 1	97	AZ DAPI.icsx_[ibrx_2023-09-20T09-43-05.611]	700001	0	AZ DAPI.icsx_[ibrx_2023-09-20T09-43-05.611]	700001	61223 PLA PARP1 HIF1A _cg_Hyp DMSO Position012 Image 85_[ims1_2023-09-20T09-43-05.611].ims	/Users/mzglab_user/Desktop/esv/pla hif1a parp1 2023/imaris/hypoxia/DMSO/61223 PLA PARP1 HIF1A _cg_Hyp DMSO Position012 Image 85_[ims1_2023-09-20T09-43-05.611].ims
1350000		2	Image 1	98	AZ DAPI.icsx_[ibrx_2023-09-20T09-43-05.611]	700001	1	AZ DAPI.icsx_[ibrx_2023-09-20T09-43-05.611]	700001	61223 PLA PARP1 HIF1A _cg_Hyp DMSO Position012 Image 85_[ims1_2023-09-20T09-43-05.611].ims	/Users/mzglab_user/Desktop/esv/pla hif1a parp1 2023/imaris/hypoxia/DMSO/61223 PLA PARP1 HIF1A _cg_Hyp DMSO Position012 Image 85_[ims1_2023-09-20T09-43-05.611].ims
1240000		2	Image 1	99	AZ DAPI.icsx_[ibrx_2023-09-20T09-43-05.611]	700001	3	AZ DAPI.icsx_[ibrx_2023-09-20T09-43-05.611]	700001	61223 PLA PARP1 HIF1A _cg_Hyp DMSO Position012 Image 85_[ims1_2023-09-20T09-43-05.611].ims	/Users/mzglab_user/Desktop/esv/pla hif1a parp1 2023/imaris/hypoxia/DMSO/61223 PLA PARP1 HIF1A _cg_Hyp DMSO Position012 Image 85_[ims1_2023-09-20T09-43-05.611].ims
718000		2	Image 1	100	AZ DAPI.icsx_[ibrx_2023-09-20T09-43-05.611]	700001	4	AZ DAPI.icsx_[ibrx_2023-09-20T09-43-05.611]	700001	61223 PLA PARP1 HIF1A _cg_Hyp DMSO Position012 Image 85_[ims1_2023-09-20T09-43-05.611].ims	/Users/mzglab_user/Desktop/esv/pla hif1a parp1 2023/imaris/hypoxia/DMSO/61223 PLA PARP1 HIF1A _cg_Hyp DMSO Position012 Image 85_[ims1_2023-09-20T09-43-05.611].ims
949000		2	Image 1	101	AZ DAPI.icsx_[ibrx_2023-09-20T09-43-05.611]	700001	10	AZ DAPI.icsx_[ibrx_2023-09-20T09-43-05.611]	700001	61223 PLA PARP1 HIF1A _cg_Hyp DMSO Position012 Image 85_[ims1_2023-09-20T09-43-05.611].ims	/Users/mzglab_user/Desktop/esv/pla hif1a parp1 2023/imaris/hypoxia/DMSO/61223 PLA PARP1 HIF1A _cg_Hyp DMSO Position012 Image 85_[ims1_2023-09-20T09-43-05.611].ims
1490000		2	Image 1	102	AZ DAPI.icsx_[ibrx_2023-09-20T09-43-05.611]	700001	14	AZ DAPI.icsx_[ibrx_2023-09-20T09-43-05.611]	700001	61223 PLA PARP1 HIF1A _cg_Hyp DMSO Position012 Image 85_[ims1_2023-09-20T09-43-05.611].ims	/Users/mzglab_user/Desktop/esv/pla hif1a parp1 2023/imaris/hypoxia/DMSO/61223 PLA PARP1 HIF1A _cg_Hyp DMSO Position012 Image 85_[ims1_2023-09-20T09-43-05.611].ims
2440000		2	Image 1	103	AZ DAPI.icsx_[ibrx_2023-09-20T09-43-05.611]	700001	19	AZ DAPI.icsx_[ibrx_2023-09-20T09-43-05.611]	700001	61223 PLA PARP1 HIF1A _cg_Hyp DMSO Position012 Image 85_[ims1_2023-09-20T09-43-05.611].ims	/Users/mzglab_user/Desktop/esv/pla hif1a parp1 2023/imaris/hypoxia/DMSO/61223 PLA PARP1 HIF1A _cg_Hyp DMSO Position012 Image 85_[ims1_2023-09-20T09-43-05.611].ims
1920000		2	Image 1	104	AZ DAPI.icsx_[ibrx_2023-09-20T09-43-05.611]	700001	24	AZ DAPI.icsx_[ibrx_2023-09-20T09-43-05.611]	700001	61223 PLA PARP1 HIF1A _cg_Hyp DMSO Position012 Image 85_[ims1_2023-09-20T09-43-05.611].ims	/Users/mzglab_user/Desktop/esv/pla hif1a parp1 2023/imaris/hypoxia/DMSO/61223 PLA PARP1 HIF1A _cg_Hyp DMSO Position012 Image 85_[ims1_2023-09-20T09-43-05.611].ims
2190000		2	Image 1	105	AZ DAPI.icsx_[ibrx_2023-09-20T09-43-05.611]	700001	24	AZ DAPI.icsx_[ibrx_2023-09-20T09-43-05.611]	700001	61223 PLA PARP1 HIF1A _ch_Hyp DMSO Position013 Image 86_[ims1_2023-09-20T09-43-05.611].ims	/Users/mzglab_user/Desktop/esv/pla hif1a parp1 2023/imaris/hypoxia/DMSO/61223 PLA PARP1 HIF1A _ch_Hyp DMSO Position013 Image 86_[ims1_2023-09-20T09-43-05.611].ims
130		2	Image 1	106	AZ DAPI.icsx_[ibrx_2023-09-20T09-43-05.611]	700001	39	AZ DAPI.icsx_[ibrx_2023-09-20T09-43-05.611]	700001	61223 PLA PARP1 HIF1A _ch_Hyp DMSO Position013 Image 86_[ims1_2023-09-20T09-43-05.611].ims	/Users/mzglab_user/Desktop/esv/pla hif1a parp1 2023/imaris/hypoxia/DMSO/61223 PLA PARP1 HIF1A _ch_Hyp DMSO Position013 Image 86_[ims1_2023-09-20T09-43-05.611].ims
4280000		2	Image 1	107	AZ DAPI.icsx_[ibrx_2023-09-20T09-43-05.611]	700001	42	AZ DAPI.icsx_[ibrx_2023-09-20T09-43-05.611]	700001	61223 PLA PARP1 HIF1A _ch_Hyp DMSO Position013 Image 86_[ims1_2023-09-20T09-43-05.611].ims	/Users/mzglab_user/Desktop/esv/pla hif1a parp1 2023/imaris/hypoxia/DMSO/61223 PLA PARP1 HIF1A _ch_Hyp DMSO Position013 Image 86_[ims1_2023-09-20T09-43-05.611].ims
1790000		2	Image 1	108	AZ DAPI.icsx_[ibrx_2023-09-20T09-43-05.611]	700001	55	AZ DAPI.icsx_[ibrx_2023-09-20T09-43-05.611]	700001	61223 PLA PARP1 HIF1A _ch_Hyp DMSO Position013 Image 86_[ims1_2023-09-20T09-43-05.611].ims	/Users/mzglab_user/Desktop/esv/pla hif1a parp1 2023/imaris/hypoxia/DMSO/61223 PLA PARP1 HIF1A _ch_Hyp DMSO Position013 Image 86_[ims1_2023-09-20T09-43-05.611].ims
197000		2	Image 1	109	AZ DAPI.icsx_[ibrx_2023-09-20T09-43-05.611]	700001	56	AZ DAPI.icsx_[ibrx_2023-09-20T09-43-05.611]	700001	61223 PLA PARP1 HIF1A _ch_Hyp DMSO Position013 Image 86_[ims1_2023-09-20T09-43-05.611].ims	/Users/mzglab_user/Desktop/esv/pla hif1a parp1 2023/imaris/hypoxia/DMSO/61223 PLA PARP1 HIF1A _ch_Hyp DMSO Position013 Image 86_[ims1_2023-09-20T09-43-05.611].ims
0		2	Image 1	110	AZ DAPI.icsx_[ibrx_2023-09-20T09-43-05.611]	700001	65	AZ DAPI.icsx_[ibrx_2023-09-20T09-43-05.611]	700001	61223 PLA PARP1 HIF1A _ch_Hyp DMSO Position013 Image 86_[ims1_2023-09-20T09-43-05.611].ims	/Users/mzglab_user/Desktop/esv/pla hif1a parp1 2023/imaris/hypoxia/DMSO/61223 PLA PARP1 HIF1A _ch_Hyp DMSO Position013 Image 86_[ims1_2023-09-20T09-43-05.611].ims
1601		2	Image 1	111	AZ DAPI.icsx_[ibrx_2023-09-20T09-43-05.611]	700001	85	AZ DAPI.icsx_[ibrx_2023-09-20T09-43-05.611]	700001	61223 PLA PARP1 HIF1A _ch_Hyp DMSO Position013 Image 86_[ims1_2023-09-20T09-43-05.611].ims	/Users/mzglab_user/Desktop/esv/pla hif1a parp1 2023/imaris/hypoxia/DMSO/61223 PLA PARP1 HIF1A _ch_Hyp DMSO Position013 Image 86_[ims1_2023-09-20T09-43-05.611].ims
656000		2	Image 1	112	AZ DAPI.icsx_[ibrx_2023-09-20T09-43-05.611]	700001	6	AZ DAPI.icsx_[ibrx_2023-09-20T09-43-05.611]	700001	61223 PLA PARP1 HIF1A _ci_Hyp DMSO Position014 Image 87_[ims1_2023-09-20T09-43-05.611].ims	/Users/mzglab_user/Desktop/esv/pla hif1a parp1 2023/imaris/hypoxia/DMSO/61223 PLA PARP1 HIF1A _ci_Hyp DMSO Position014 Image 87_[ims1_2023-09-20T09-43-05.611].ims
14800		2	Image 1	113	AZ DAPI.icsx_[ibrx_2023-09-20T09-43-05.611]	700001	9	AZ DAPI.icsx_[ibrx_2023-09-20T09-43-05.611]	700001	61223 PLA PARP1 HIF1A _ci_Hyp DMSO Position014 Image 87_[ims1_2023-09-20T09-43-05.611].ims	/Users/mzglab_user/Desktop/esv/pla hif1a parp1 2023/imaris/hypoxia/DMSO/61223 PLA PARP1 HIF1A _ci_Hyp DMSO Position014 Image 87_[ims1_2023-09-20T09-43-05.611].ims
2720000		2	Image 1	114	AZ DAPI.icsx_[ibrx_2023-09-20T09-43-05.611]	700001	11	AZ DAPI.icsx_[ibrx_2023-09-20T09-43-05.611]	700001	61223 PLA PARP1 HIF1A _ci_Hyp DMSO Position014 Image 87_[ims1_2023-09-20T09-43-05.611].ims	/Users/mzglab_user/Desktop/esv/pla hif1a parp1 2023/imaris/hypoxia/DMSO/61223 PLA PARP1 HIF1A _ci_Hyp DMSO Position014 Image 87_[ims1_2023-09-20T09-43-05.611].ims
0		2	Image 1	115	AZ DAPI.icsx_[ibrx_2023-09-20T09-43-05.611]	700001	12	AZ DAPI.icsx_[ibrx_2023-09-20T09-43-05.611]	700001	61223 PLA PARP1 HIF1A _ci_Hyp DMSO Position014 Image 87_[ims1_2023-09-20T09-43-05.611].ims	/Users/mzglab_user/Desktop/esv/pla hif1a parp1 2023/imaris/hypoxia/DMSO/61223 PLA PARP1 HIF1A _ci_Hyp DMSO Position014 Image 87_[ims1_2023-09-20T09-43-05.611].ims
3050000		2	Image 1	116	AZ DAPI.icsx_[ibrx_2023-09-20T09-43-05.611]	700001	13	AZ DAPI.icsx_[ibrx_2023-09-20T09-43-05.611]	700001	61223 PLA PARP1 HIF1A _ci_Hyp DMSO Position014 Image 87_[ims1_2023-09-20T09-43-05.611].ims	/Users/mzglab_user/Desktop/esv/pla hif1a parp1 2023/imaris/hypoxia/DMSO/61223 PLA PARP1 HIF1A _ci_Hyp DMSO Position014 Image 87_[ims1_2023-09-20T09-43-05.611].ims
91900		2	Image 1	117	AZ DAPI.icsx_[ibrx_2023-09-20T09-43-05.611]	700001	16	AZ DAPI.icsx_[ibrx_2023-09-20T09-43-05.611]	700001	61223 PLA PARP1 HIF1A _ci_Hyp DMSO Position014 Image 87_[ims1_2023-09-20T09-43-05.611].ims	/Users/mzglab_user/Desktop/esv/pla hif1a parp1 2023/imaris/hypoxia/DMSO/61223 PLA PARP1 HIF1A _ci_Hyp DMSO Position014 Image 87_[ims1_2023-09-20T09-43-05.611].ims
884		2	Image 1	118	AZ DAPI.icsx_[ibrx_2023-09-20T09-43-05.611]	700001	18	AZ DAPI.icsx_[ibrx_2023-09-20T09-43-05.611]	700001	61223 PLA PARP1 HIF1A _ci_Hyp DMSO Position014 Image 87_[ims1_2023-09-20T09-43-05.611].ims	/Users/mzglab_user/Desktop/esv/pla hif1a parp1 2023/imaris/hypoxia/DMSO/61223 PLA PARP1 HIF1A _ci_Hyp DMSO Position014 Image 87_[ims1_2023-09-20T09-43-05.611].ims
830000		2	Image 1	119	AZ DAPI.icsx_[ibrx_2023-09-20T09-43-05.611]	700001	19	AZ DAPI.icsx_[ibrx_2023-09-20T09-43-05.611]	700001	61223 PLA PARP1 HIF1A _ci_Hyp DMSO Position014 Image 87_[ims1_2023-09-20T09-43-05.611].ims	/Users/mzglab_user/Desktop/esv/pla hif1a parp1 2023/imaris/hypoxia/DMSO/61223 PLA PARP1 HIF1A _ci_Hyp DMSO Position014 Image 87_[ims1_2023-09-20T09-43-05.611].ims
631000		2	Image 1	120	AZ DAPI.icsx_[ibrx_2023-09-20T09-43-05.611]	700001	0	AZ DAPI.icsx_[ibrx_2023-09-20T09-43-05.611]	700001	61223 PLA PARP1 HIF1A _cj_Hyp DMSO Position015 Image 88_[ims1_2023-09-20T09-43-05.611].ims	/Users/mzglab_user/Desktop/esv/pla hif1a parp1 2023/imaris/hypoxia/DMSO/61223 PLA PARP1 HIF1A _cj_Hyp DMSO Position015 Image 88_[ims1_2023-09-20T09-43-05.611].ims
1650000		2	Image 1	121	AZ DAPI.icsx_[ibrx_2023-09-20T09-43-05.611]	700001	1	AZ DAPI.icsx_[ibrx_2023-09-20T09-43-05.611]	700001	61223 PLA PARP1 HIF1A _cj_Hyp DMSO Position015 Image 88_[ims1_2023-09-20T09-43-05.611].ims	/Users/mzglab_user/Desktop/esv/pla hif1a parp1 2023/imaris/hypoxia/DMSO/61223 PLA PARP1 HIF1A _cj_Hyp DMSO Position015 Image 88_[ims1_2023-09-20T09-43-05.611].ims
1680000		2	Image 1	122	AZ DAPI.icsx_[ibrx_2023-09-20T09-43-05.611]	700001	3	AZ DAPI.icsx_[ibrx_2023-09-20T09-43-05.611]	700001	61223 PLA PARP1 HIF1A _cj_Hyp DMSO Position015 Image 88_[ims1_2023-09-20T09-43-05.611].ims	/Users/mzglab_user/Desktop/esv/pla hif1a parp1 2023/imaris/hypoxia/DMSO/61223 PLA PARP1 HIF1A _cj_Hyp DMSO Position015 Image 88_[ims1_2023-09-20T09-43-05.611].ims
935000		2	Image 1	123	AZ DAPI.icsx_[ibrx_2023-09-20T09-43-05.611]	700001	5	AZ DAPI.icsx_[ibrx_2023-09-20T09-43-05.611]	700001	61223 PLA PARP1 HIF1A _cj_Hyp DMSO Position015 Image 88_[ims1_2023-09-20T09-43-05.611].ims	/Users/mzglab_user/Desktop/esv/pla hif1a parp1 2023/imaris/hypoxia/DMSO/61223 PLA PARP1 HIF1A _cj_Hyp DMSO Position015 Image 88_[ims1_2023-09-20T09-43-05.611].ims
2530000		2	Image 1	124	AZ DAPI.icsx_[ibrx_2023-09-20T09-43-05.611]	700001	8	AZ DAPI.icsx_[ibrx_2023-09-20T09-43-05.611]	700001	61223 PLA PARP1 HIF1A _cj_Hyp DMSO Position015 Image 88_[ims1_2023-09-20T09-43-05.611].ims	/Users/mzglab_user/Desktop/esv/pla hif1a parp1 2023/imaris/hypoxia/DMSO/61223 PLA PARP1 HIF1A _cj_Hyp DMSO Position015 Image 88_[ims1_2023-09-20T09-43-05.611].ims
3520000		2	Image 1	125	AZ DAPI.icsx_[ibrx_2023-09-20T09-43-05.611]	700001	9	AZ DAPI.icsx_[ibrx_2023-09-20T09-43-05.611]	700001	61223 PLA PARP1 HIF1A _cj_Hyp DMSO Position015 Image 88_[ims1_2023-09-20T09-43-05.611].ims	/Users/mzglab_user/Desktop/esv/pla hif1a parp1 2023/imaris/hypoxia/DMSO/61223 PLA PARP1 HIF1A _cj_Hyp DMSO Position015 Image 88_[ims1_2023-09-20T09-43-05.611].ims
1890000		2	Image 1	126	AZ DAPI.icsx_[ibrx_2023-09-20T09-43-05.611]	700001	10	AZ DAPI.icsx_[ibrx_2023-09-20T09-43-05.611]	700001	61223 PLA PARP1 HIF1A _cj_Hyp DMSO Position015 Image 88_[ims1_2023-09-20T09-43-05.611].ims	/Users/mzglab_user/Desktop/esv/pla hif1a parp1 2023/imaris/hypoxia/DMSO/61223 PLA PARP1 HIF1A _cj_Hyp DMSO Position015 Image 88_[ims1_2023-09-20T09-43-05.611].ims
2930000		2	Image 1	127	AZ DAPI.icsx_[ibrx_2023-09-20T09-43-05.611]	700001	11	AZ DAPI.icsx_[ibrx_2023-09-20T09-43-05.611]	700001	61223 PLA PARP1 HIF1A _cj_Hyp DMSO Position015 Image 88_[ims1_2023-09-20T09-43-05.611].ims	/Users/mzglab_user/Desktop/esv/pla hif1a parp1 2023/imaris/hypoxia/DMSO/61223 PLA PARP1 HIF1A _cj_Hyp DMSO Position015 Image 88_[ims1_2023-09-20T09-43-05.611].ims
1290000		2	Image 1	128	AZ DAPI.icsx_[ibrx_2023-09-20T09-43-05.611]	700001	22	AZ DAPI.icsx_[ibrx_2023-09-20T09-43-05.611]	700001	61223 PLA PARP1 HIF1A _ck_Hyp DMSO Position016 Image 89_[ims1_2023-09-20T09-43-05.611].ims	/Users/mzglab_user/Desktop/esv/pla hif1a parp1 2023/imaris/hypoxia/DMSO/61223 PLA PARP1 HIF1A _ck_Hyp DMSO Position016 Image 89_[ims1_2023-09-20T09-43-05.611].ims
1980000		2	Image 1	129	AZ DAPI.icsx_[ibrx_2023-09-20T09-43-05.611]	700001	26	AZ DAPI.icsx_[ibrx_2023-09-20T09-43-05.611]	700001	61223 PLA PARP1 HIF1A _ck_Hyp DMSO Position016 Image 89_[ims1_2023-09-20T09-43-05.611].ims	/Users/mzglab_user/Desktop/esv/pla hif1a parp1 2023/imaris/hypoxia/DMSO/61223 PLA PARP1 HIF1A _ck_Hyp DMSO Position016 Image 89_[ims1_2023-09-20T09-43-05.611].ims
1590000		2	Image 1	130	AZ DAPI.icsx_[ibrx_2023-09-20T09-43-05.611]	700001	42	AZ DAPI.icsx_[ibrx_2023-09-20T09-43-05.611]	700001	61223 PLA PARP1 HIF1A _ck_Hyp DMSO Position016 Image 89_[ims1_2023-09-20T09-43-05.611].ims	/Users/mzglab_user/Desktop/esv/pla hif1a parp1 2023/imaris/hypoxia/DMSO/61223 PLA PARP1 HIF1A _ck_Hyp DMSO Position016 Image 89_[ims1_2023-09-20T09-43-05.611].ims
2710000		2	Image 1	131	AZ DAPI.icsx_[ibrx_2023-09-20T09-43-05.611]	700001	59	AZ DAPI.icsx_[ibrx_2023-09-20T09-43-05.611]	700001	61223 PLA PARP1 HIF1A _ck_Hyp DMSO Position016 Image 89_[ims1_2023-09-20T09-43-05.611].ims	/Users/mzglab_user/Desktop/esv/pla hif1a parp1 2023/imaris/hypoxia/DMSO/61223 PLA PARP1 HIF1A _ck_Hyp DMSO Position016 Image 89_[ims1_2023-09-20T09-43-05.611].ims
5640000		2	Image 1	132	AZ DAPI.icsx_[ibrx_2023-09-20T09-43-05.611]	700001	72	AZ DAPI.icsx_[ibrx_2023-09-20T09-43-05.611]	700001	61223 PLA PARP1 HIF1A _ck_Hyp DMSO Position016 Image 89_[ims1_2023-09-20T09-43-05.611].ims	/Users/mzglab_user/Desktop/esv/pla hif1a parp1 2023/imaris/hypoxia/DMSO/61223 PLA PARP1 HIF1A _ck_Hyp DMSO Position016 Image 89_[ims1_2023-09-20T09-43-05.611].ims
2550000		2	Image 1	133	AZ DAPI.icsx_[ibrx_2023-09-20T09-43-05.611]	700001	76	AZ DAPI.icsx_[ibrx_2023-09-20T09-43-05.611]	700001	61223 PLA PARP1 HIF1A _ck_Hyp DMSO Position016 Image 89_[ims1_2023-09-20T09-43-05.611].ims	/Users/mzglab_user/Desktop/esv/pla hif1a parp1 2023/imaris/hypoxia/DMSO/61223 PLA PARP1 HIF1A _ck_Hyp DMSO Position016 Image 89_[ims1_2023-09-20T09-43-05.611].ims
2390000		2	Image 1	134	AZ DAPI.icsx_[ibrx_2023-09-20T09-43-05.611]	700001	95	AZ DAPI.icsx_[ibrx_2023-09-20T09-43-05.611]	700001	61223 PLA PARP1 HIF1A _ck_Hyp DMSO Position016 Image 89_[ims1_2023-09-20T09-43-05.611].ims	/Users/mzglab_user/Desktop/esv/pla hif1a parp1 2023/imaris/hypoxia/DMSO/61223 PLA PARP1 HIF1A _ck_Hyp DMSO Position016 Image 89_[ims1_2023-09-20T09-43-05.611].ims
6470000		2	Image 1	135	AZ DAPI.icsx_[ibrx_2023-09-20T09-43-05.611]	700001	130	AZ DAPI.icsx_[ibrx_2023-09-20T09-43-05.611]	700001	61223 PLA PARP1 HIF1A _ck_Hyp DMSO Position016 Image 89_[ims1_2023-09-20T09-43-05.611].ims	/Users/mzglab_user/Desktop/esv/pla hif1a parp1 2023/imaris/hypoxia/DMSO/61223 PLA PARP1 HIF1A _ck_Hyp DMSO Position016 Image 89_[ims1_2023-09-20T09-43-05.611].ims
