# Supplementary material for: HIF1A-mediated pathways promote euploid cell survival in chromosomally mosaic embryos
Source: eLife. 2025 Oct 14;13:RP101912. doi: 10.7554/eLife.101912 (PMC12520657; doi:10.7554/eLife.101912)
Supplement: Figure 3—source data 6. [file elife-101912-fig3-data6.xls]

## Sheet: Scatter Plot 1D
Scatter Plot 1D
Intensity Sum Ch=2 Img=1	Unit	Channel	Image	ID	Surpass Object	Surpass Object Data ID	Original ID	Original Component Name	Original Component ID	Original Image Name	Original Image ID
28000		2	Image 1	0	AZ DAPI.icsx_[ibrx_2023-09-20T09-41-38.028]	700001	0	AZ DAPI.icsx_[ibrx_2023-09-20T09-41-38.028]	700001	61223 PLA PARP1 HIF1A _bc_Hyp AZ Position001 Image 55_[ims1_2023-09-20T09-41-38.028].ims	/Users/mzglab_user/Desktop/esv/pla hif1a parp1 2023/imaris/hypoxia/az3146/61223 PLA PARP1 HIF1A _bc_Hyp AZ Position001 Image 55_[ims1_2023-09-20T09-41-38.028].ims
23800		2	Image 1	1	AZ DAPI.icsx_[ibrx_2023-09-20T09-41-38.028]	700001	1	AZ DAPI.icsx_[ibrx_2023-09-20T09-41-38.028]	700001	61223 PLA PARP1 HIF1A _bc_Hyp AZ Position001 Image 55_[ims1_2023-09-20T09-41-38.028].ims	/Users/mzglab_user/Desktop/esv/pla hif1a parp1 2023/imaris/hypoxia/az3146/61223 PLA PARP1 HIF1A _bc_Hyp AZ Position001 Image 55_[ims1_2023-09-20T09-41-38.028].ims
187000		2	Image 1	3	AZ DAPI.icsx_[ibrx_2023-09-20T09-41-38.028]	700001	3	AZ DAPI.icsx_[ibrx_2023-09-20T09-41-38.028]	700001	61223 PLA PARP1 HIF1A _bc_Hyp AZ Position001 Image 55_[ims1_2023-09-20T09-41-38.028].ims	/Users/mzglab_user/Desktop/esv/pla hif1a parp1 2023/imaris/hypoxia/az3146/61223 PLA PARP1 HIF1A _bc_Hyp AZ Position001 Image 55_[ims1_2023-09-20T09-41-38.028].ims
450000		2	Image 1	4	AZ DAPI.icsx_[ibrx_2023-09-20T09-41-38.028]	700001	4	AZ DAPI.icsx_[ibrx_2023-09-20T09-41-38.028]	700001	61223 PLA PARP1 HIF1A _bc_Hyp AZ Position001 Image 55_[ims1_2023-09-20T09-41-38.028].ims	/Users/mzglab_user/Desktop/esv/pla hif1a parp1 2023/imaris/hypoxia/az3146/61223 PLA PARP1 HIF1A _bc_Hyp AZ Position001 Image 55_[ims1_2023-09-20T09-41-38.028].ims
94300		2	Image 1	5	AZ DAPI.icsx_[ibrx_2023-09-20T09-41-38.028]	700001	5	AZ DAPI.icsx_[ibrx_2023-09-20T09-41-38.028]	700001	61223 PLA PARP1 HIF1A _bc_Hyp AZ Position001 Image 55_[ims1_2023-09-20T09-41-38.028].ims	/Users/mzglab_user/Desktop/esv/pla hif1a parp1 2023/imaris/hypoxia/az3146/61223 PLA PARP1 HIF1A _bc_Hyp AZ Position001 Image 55_[ims1_2023-09-20T09-41-38.028].ims
139000		2	Image 1	6	AZ DAPI.icsx_[ibrx_2023-09-20T09-41-38.028]	700001	6	AZ DAPI.icsx_[ibrx_2023-09-20T09-41-38.028]	700001	61223 PLA PARP1 HIF1A _bc_Hyp AZ Position001 Image 55_[ims1_2023-09-20T09-41-38.028].ims	/Users/mzglab_user/Desktop/esv/pla hif1a parp1 2023/imaris/hypoxia/az3146/61223 PLA PARP1 HIF1A _bc_Hyp AZ Position001 Image 55_[ims1_2023-09-20T09-41-38.028].ims
322000		2	Image 1	7	AZ DAPI.icsx_[ibrx_2023-09-20T09-41-38.028]	700001	7	AZ DAPI.icsx_[ibrx_2023-09-20T09-41-38.028]	700001	61223 PLA PARP1 HIF1A _bc_Hyp AZ Position001 Image 55_[ims1_2023-09-20T09-41-38.028].ims	/Users/mzglab_user/Desktop/esv/pla hif1a parp1 2023/imaris/hypoxia/az3146/61223 PLA PARP1 HIF1A _bc_Hyp AZ Position001 Image 55_[ims1_2023-09-20T09-41-38.028].ims
68400		2	Image 1	8	AZ DAPI.icsx_[ibrx_2023-09-20T09-41-38.028]	700001	8	AZ DAPI.icsx_[ibrx_2023-09-20T09-41-38.028]	700001	61223 PLA PARP1 HIF1A _bc_Hyp AZ Position001 Image 55_[ims1_2023-09-20T09-41-38.028].ims	/Users/mzglab_user/Desktop/esv/pla hif1a parp1 2023/imaris/hypoxia/az3146/61223 PLA PARP1 HIF1A _bc_Hyp AZ Position001 Image 55_[ims1_2023-09-20T09-41-38.028].ims
261000		2	Image 1	9	AZ DAPI.icsx_[ibrx_2023-09-20T09-41-38.028]	700001	0	AZ DAPI.icsx_[ibrx_2023-09-20T09-41-38.028]	700001	61223 PLA PARP1 HIF1A _bd_Hyp AZ Position002 Image 56_[ims1_2023-09-20T09-41-38.028].ims	/Users/mzglab_user/Desktop/esv/pla hif1a parp1 2023/imaris/hypoxia/az3146/61223 PLA PARP1 HIF1A _bd_Hyp AZ Position002 Image 56_[ims1_2023-09-20T09-41-38.028].ims
12000		2	Image 1	10	AZ DAPI.icsx_[ibrx_2023-09-20T09-41-38.028]	700001	1	AZ DAPI.icsx_[ibrx_2023-09-20T09-41-38.028]	700001	61223 PLA PARP1 HIF1A _bd_Hyp AZ Position002 Image 56_[ims1_2023-09-20T09-41-38.028].ims	/Users/mzglab_user/Desktop/esv/pla hif1a parp1 2023/imaris/hypoxia/az3146/61223 PLA PARP1 HIF1A _bd_Hyp AZ Position002 Image 56_[ims1_2023-09-20T09-41-38.028].ims
2360000		2	Image 1	11	AZ DAPI.icsx_[ibrx_2023-09-20T09-41-38.028]	700001	2	AZ DAPI.icsx_[ibrx_2023-09-20T09-41-38.028]	700001	61223 PLA PARP1 HIF1A _bd_Hyp AZ Position002 Image 56_[ims1_2023-09-20T09-41-38.028].ims	/Users/mzglab_user/Desktop/esv/pla hif1a parp1 2023/imaris/hypoxia/az3146/61223 PLA PARP1 HIF1A _bd_Hyp AZ Position002 Image 56_[ims1_2023-09-20T09-41-38.028].ims
14700		2	Image 1	12	AZ DAPI.icsx_[ibrx_2023-09-20T09-41-38.028]	700001	4	AZ DAPI.icsx_[ibrx_2023-09-20T09-41-38.028]	700001	61223 PLA PARP1 HIF1A _bd_Hyp AZ Position002 Image 56_[ims1_2023-09-20T09-41-38.028].ims	/Users/mzglab_user/Desktop/esv/pla hif1a parp1 2023/imaris/hypoxia/az3146/61223 PLA PARP1 HIF1A _bd_Hyp AZ Position002 Image 56_[ims1_2023-09-20T09-41-38.028].ims
154000		2	Image 1	13	AZ DAPI.icsx_[ibrx_2023-09-20T09-41-38.028]	700001	5	AZ DAPI.icsx_[ibrx_2023-09-20T09-41-38.028]	700001	61223 PLA PARP1 HIF1A _bd_Hyp AZ Position002 Image 56_[ims1_2023-09-20T09-41-38.028].ims	/Users/mzglab_user/Desktop/esv/pla hif1a parp1 2023/imaris/hypoxia/az3146/61223 PLA PARP1 HIF1A _bd_Hyp AZ Position002 Image 56_[ims1_2023-09-20T09-41-38.028].ims
111000		2	Image 1	14	AZ DAPI.icsx_[ibrx_2023-09-20T09-41-38.028]	700001	6	AZ DAPI.icsx_[ibrx_2023-09-20T09-41-38.028]	700001	61223 PLA PARP1 HIF1A _bd_Hyp AZ Position002 Image 56_[ims1_2023-09-20T09-41-38.028].ims	/Users/mzglab_user/Desktop/esv/pla hif1a parp1 2023/imaris/hypoxia/az3146/61223 PLA PARP1 HIF1A _bd_Hyp AZ Position002 Image 56_[ims1_2023-09-20T09-41-38.028].ims
218000		2	Image 1	15	AZ DAPI.icsx_[ibrx_2023-09-20T09-41-38.028]	700001	7	AZ DAPI.icsx_[ibrx_2023-09-20T09-41-38.028]	700001	61223 PLA PARP1 HIF1A _bd_Hyp AZ Position002 Image 56_[ims1_2023-09-20T09-41-38.028].ims	/Users/mzglab_user/Desktop/esv/pla hif1a parp1 2023/imaris/hypoxia/az3146/61223 PLA PARP1 HIF1A _bd_Hyp AZ Position002 Image 56_[ims1_2023-09-20T09-41-38.028].ims
54900		2	Image 1	16	AZ DAPI.icsx_[ibrx_2023-09-20T09-41-38.028]	700001	8	AZ DAPI.icsx_[ibrx_2023-09-20T09-41-38.028]	700001	61223 PLA PARP1 HIF1A _bd_Hyp AZ Position002 Image 56_[ims1_2023-09-20T09-41-38.028].ims	/Users/mzglab_user/Desktop/esv/pla hif1a parp1 2023/imaris/hypoxia/az3146/61223 PLA PARP1 HIF1A _bd_Hyp AZ Position002 Image 56_[ims1_2023-09-20T09-41-38.028].ims
7849		2	Image 1	17	AZ DAPI.icsx_[ibrx_2023-09-20T09-41-38.028]	700001	0	AZ DAPI.icsx_[ibrx_2023-09-20T09-41-38.028]	700001	61223 PLA PARP1 HIF1A _be_Hyp AZ Position004 Image 57_[ims1_2023-09-20T09-41-38.028].ims	/Users/mzglab_user/Desktop/esv/pla hif1a parp1 2023/imaris/hypoxia/az3146/61223 PLA PARP1 HIF1A _be_Hyp AZ Position004 Image 57_[ims1_2023-09-20T09-41-38.028].ims
56300		2	Image 1	18	AZ DAPI.icsx_[ibrx_2023-09-20T09-41-38.028]	700001	1	AZ DAPI.icsx_[ibrx_2023-09-20T09-41-38.028]	700001	61223 PLA PARP1 HIF1A _be_Hyp AZ Position004 Image 57_[ims1_2023-09-20T09-41-38.028].ims	/Users/mzglab_user/Desktop/esv/pla hif1a parp1 2023/imaris/hypoxia/az3146/61223 PLA PARP1 HIF1A _be_Hyp AZ Position004 Image 57_[ims1_2023-09-20T09-41-38.028].ims
94900		2	Image 1	19	AZ DAPI.icsx_[ibrx_2023-09-20T09-41-38.028]	700001	3	AZ DAPI.icsx_[ibrx_2023-09-20T09-41-38.028]	700001	61223 PLA PARP1 HIF1A _be_Hyp AZ Position004 Image 57_[ims1_2023-09-20T09-41-38.028].ims	/Users/mzglab_user/Desktop/esv/pla hif1a parp1 2023/imaris/hypoxia/az3146/61223 PLA PARP1 HIF1A _be_Hyp AZ Position004 Image 57_[ims1_2023-09-20T09-41-38.028].ims
38100		2	Image 1	20	AZ DAPI.icsx_[ibrx_2023-09-20T09-41-38.028]	700001	4	AZ DAPI.icsx_[ibrx_2023-09-20T09-41-38.028]	700001	61223 PLA PARP1 HIF1A _be_Hyp AZ Position004 Image 57_[ims1_2023-09-20T09-41-38.028].ims	/Users/mzglab_user/Desktop/esv/pla hif1a parp1 2023/imaris/hypoxia/az3146/61223 PLA PARP1 HIF1A _be_Hyp AZ Position004 Image 57_[ims1_2023-09-20T09-41-38.028].ims
23400		2	Image 1	21	AZ DAPI.icsx_[ibrx_2023-09-20T09-41-38.028]	700001	5	AZ DAPI.icsx_[ibrx_2023-09-20T09-41-38.028]	700001	61223 PLA PARP1 HIF1A _be_Hyp AZ Position004 Image 57_[ims1_2023-09-20T09-41-38.028].ims	/Users/mzglab_user/Desktop/esv/pla hif1a parp1 2023/imaris/hypoxia/az3146/61223 PLA PARP1 HIF1A _be_Hyp AZ Position004 Image 57_[ims1_2023-09-20T09-41-38.028].ims
12900		2	Image 1	22	AZ DAPI.icsx_[ibrx_2023-09-20T09-41-38.028]	700001	6	AZ DAPI.icsx_[ibrx_2023-09-20T09-41-38.028]	700001	61223 PLA PARP1 HIF1A _be_Hyp AZ Position004 Image 57_[ims1_2023-09-20T09-41-38.028].ims	/Users/mzglab_user/Desktop/esv/pla hif1a parp1 2023/imaris/hypoxia/az3146/61223 PLA PARP1 HIF1A _be_Hyp AZ Position004 Image 57_[ims1_2023-09-20T09-41-38.028].ims
66800		2	Image 1	23	AZ DAPI.icsx_[ibrx_2023-09-20T09-41-38.028]	700001	7	AZ DAPI.icsx_[ibrx_2023-09-20T09-41-38.028]	700001	61223 PLA PARP1 HIF1A _be_Hyp AZ Position004 Image 57_[ims1_2023-09-20T09-41-38.028].ims	/Users/mzglab_user/Desktop/esv/pla hif1a parp1 2023/imaris/hypoxia/az3146/61223 PLA PARP1 HIF1A _be_Hyp AZ Position004 Image 57_[ims1_2023-09-20T09-41-38.028].ims
127000		2	Image 1	24	AZ DAPI.icsx_[ibrx_2023-09-20T09-41-38.028]	700001	8	AZ DAPI.icsx_[ibrx_2023-09-20T09-41-38.028]	700001	61223 PLA PARP1 HIF1A _be_Hyp AZ Position004 Image 57_[ims1_2023-09-20T09-41-38.028].ims	/Users/mzglab_user/Desktop/esv/pla hif1a parp1 2023/imaris/hypoxia/az3146/61223 PLA PARP1 HIF1A _be_Hyp AZ Position004 Image 57_[ims1_2023-09-20T09-41-38.028].ims
28300		2	Image 1	25	AZ DAPI.icsx_[ibrx_2023-09-20T09-41-38.028]	700001	2	AZ DAPI.icsx_[ibrx_2023-09-20T09-41-38.028]	700001	61223 PLA PARP1 HIF1A _bf_Hyp AZ Position005 Image 58_[ims1_2023-09-20T09-41-38.028].ims	/Users/mzglab_user/Desktop/esv/pla hif1a parp1 2023/imaris/hypoxia/az3146/61223 PLA PARP1 HIF1A _bf_Hyp AZ Position005 Image 58_[ims1_2023-09-20T09-41-38.028].ims
117000		2	Image 1	26	AZ DAPI.icsx_[ibrx_2023-09-20T09-41-38.028]	700001	4	AZ DAPI.icsx_[ibrx_2023-09-20T09-41-38.028]	700001	61223 PLA PARP1 HIF1A _bf_Hyp AZ Position005 Image 58_[ims1_2023-09-20T09-41-38.028].ims	/Users/mzglab_user/Desktop/esv/pla hif1a parp1 2023/imaris/hypoxia/az3146/61223 PLA PARP1 HIF1A _bf_Hyp AZ Position005 Image 58_[ims1_2023-09-20T09-41-38.028].ims
31400		2	Image 1	27	AZ DAPI.icsx_[ibrx_2023-09-20T09-41-38.028]	700001	6	AZ DAPI.icsx_[ibrx_2023-09-20T09-41-38.028]	700001	61223 PLA PARP1 HIF1A _bf_Hyp AZ Position005 Image 58_[ims1_2023-09-20T09-41-38.028].ims	/Users/mzglab_user/Desktop/esv/pla hif1a parp1 2023/imaris/hypoxia/az3146/61223 PLA PARP1 HIF1A _bf_Hyp AZ Position005 Image 58_[ims1_2023-09-20T09-41-38.028].ims
19900		2	Image 1	28	AZ DAPI.icsx_[ibrx_2023-09-20T09-41-38.028]	700001	8	AZ DAPI.icsx_[ibrx_2023-09-20T09-41-38.028]	700001	61223 PLA PARP1 HIF1A _bf_Hyp AZ Position005 Image 58_[ims1_2023-09-20T09-41-38.028].ims	/Users/mzglab_user/Desktop/esv/pla hif1a parp1 2023/imaris/hypoxia/az3146/61223 PLA PARP1 HIF1A _bf_Hyp AZ Position005 Image 58_[ims1_2023-09-20T09-41-38.028].ims
26200		2	Image 1	29	AZ DAPI.icsx_[ibrx_2023-09-20T09-41-38.028]	700001	9	AZ DAPI.icsx_[ibrx_2023-09-20T09-41-38.028]	700001	61223 PLA PARP1 HIF1A _bf_Hyp AZ Position005 Image 58_[ims1_2023-09-20T09-41-38.028].ims	/Users/mzglab_user/Desktop/esv/pla hif1a parp1 2023/imaris/hypoxia/az3146/61223 PLA PARP1 HIF1A _bf_Hyp AZ Position005 Image 58_[ims1_2023-09-20T09-41-38.028].ims
19000		2	Image 1	30	AZ DAPI.icsx_[ibrx_2023-09-20T09-41-38.028]	700001	10	AZ DAPI.icsx_[ibrx_2023-09-20T09-41-38.028]	700001	61223 PLA PARP1 HIF1A _bf_Hyp AZ Position005 Image 58_[ims1_2023-09-20T09-41-38.028].ims	/Users/mzglab_user/Desktop/esv/pla hif1a parp1 2023/imaris/hypoxia/az3146/61223 PLA PARP1 HIF1A _bf_Hyp AZ Position005 Image 58_[ims1_2023-09-20T09-41-38.028].ims
26700		2	Image 1	31	AZ DAPI.icsx_[ibrx_2023-09-20T09-41-38.028]	700001	11	AZ DAPI.icsx_[ibrx_2023-09-20T09-41-38.028]	700001	61223 PLA PARP1 HIF1A _bf_Hyp AZ Position005 Image 58_[ims1_2023-09-20T09-41-38.028].ims	/Users/mzglab_user/Desktop/esv/pla hif1a parp1 2023/imaris/hypoxia/az3146/61223 PLA PARP1 HIF1A _bf_Hyp AZ Position005 Image 58_[ims1_2023-09-20T09-41-38.028].ims
67600		2	Image 1	32	AZ DAPI.icsx_[ibrx_2023-09-20T09-41-38.028]	700001	0	AZ DAPI.icsx_[ibrx_2023-09-20T09-41-38.028]	700001	61223 PLA PARP1 HIF1A _bg_Hyp AZ Position006 Image 59_[ims1_2023-09-20T09-41-38.028].ims	/Users/mzglab_user/Desktop/esv/pla hif1a parp1 2023/imaris/hypoxia/az3146/61223 PLA PARP1 HIF1A _bg_Hyp AZ Position006 Image 59_[ims1_2023-09-20T09-41-38.028].ims
2865		2	Image 1	33	AZ DAPI.icsx_[ibrx_2023-09-20T09-41-38.028]	700001	1	AZ DAPI.icsx_[ibrx_2023-09-20T09-41-38.028]	700001	61223 PLA PARP1 HIF1A _bg_Hyp AZ Position006 Image 59_[ims1_2023-09-20T09-41-38.028].ims	/Users/mzglab_user/Desktop/esv/pla hif1a parp1 2023/imaris/hypoxia/az3146/61223 PLA PARP1 HIF1A _bg_Hyp AZ Position006 Image 59_[ims1_2023-09-20T09-41-38.028].ims
647000		2	Image 1	34	AZ DAPI.icsx_[ibrx_2023-09-20T09-41-38.028]	700001	2	AZ DAPI.icsx_[ibrx_2023-09-20T09-41-38.028]	700001	61223 PLA PARP1 HIF1A _bg_Hyp AZ Position006 Image 59_[ims1_2023-09-20T09-41-38.028].ims	/Users/mzglab_user/Desktop/esv/pla hif1a parp1 2023/imaris/hypoxia/az3146/61223 PLA PARP1 HIF1A _bg_Hyp AZ Position006 Image 59_[ims1_2023-09-20T09-41-38.028].ims
311000		2	Image 1	35	AZ DAPI.icsx_[ibrx_2023-09-20T09-41-38.028]	700001	4	AZ DAPI.icsx_[ibrx_2023-09-20T09-41-38.028]	700001	61223 PLA PARP1 HIF1A _bg_Hyp AZ Position006 Image 59_[ims1_2023-09-20T09-41-38.028].ims	/Users/mzglab_user/Desktop/esv/pla hif1a parp1 2023/imaris/hypoxia/az3146/61223 PLA PARP1 HIF1A _bg_Hyp AZ Position006 Image 59_[ims1_2023-09-20T09-41-38.028].ims
12600		2	Image 1	36	AZ DAPI.icsx_[ibrx_2023-09-20T09-41-38.028]	700001	5	AZ DAPI.icsx_[ibrx_2023-09-20T09-41-38.028]	700001	61223 PLA PARP1 HIF1A _bg_Hyp AZ Position006 Image 59_[ims1_2023-09-20T09-41-38.028].ims	/Users/mzglab_user/Desktop/esv/pla hif1a parp1 2023/imaris/hypoxia/az3146/61223 PLA PARP1 HIF1A _bg_Hyp AZ Position006 Image 59_[ims1_2023-09-20T09-41-38.028].ims
42000		2	Image 1	37	AZ DAPI.icsx_[ibrx_2023-09-20T09-41-38.028]	700001	6	AZ DAPI.icsx_[ibrx_2023-09-20T09-41-38.028]	700001	61223 PLA PARP1 HIF1A _bg_Hyp AZ Position006 Image 59_[ims1_2023-09-20T09-41-38.028].ims	/Users/mzglab_user/Desktop/esv/pla hif1a parp1 2023/imaris/hypoxia/az3146/61223 PLA PARP1 HIF1A _bg_Hyp AZ Position006 Image 59_[ims1_2023-09-20T09-41-38.028].ims
2800000		2	Image 1	38	AZ DAPI.icsx_[ibrx_2023-09-20T09-41-38.028]	700001	7	AZ DAPI.icsx_[ibrx_2023-09-20T09-41-38.028]	700001	61223 PLA PARP1 HIF1A _bg_Hyp AZ Position006 Image 59_[ims1_2023-09-20T09-41-38.028].ims	/Users/mzglab_user/Desktop/esv/pla hif1a parp1 2023/imaris/hypoxia/az3146/61223 PLA PARP1 HIF1A _bg_Hyp AZ Position006 Image 59_[ims1_2023-09-20T09-41-38.028].ims
768000		2	Image 1	39	AZ DAPI.icsx_[ibrx_2023-09-20T09-41-38.028]	700001	8	AZ DAPI.icsx_[ibrx_2023-09-20T09-41-38.028]	700001	61223 PLA PARP1 HIF1A _bg_Hyp AZ Position006 Image 59_[ims1_2023-09-20T09-41-38.028].ims	/Users/mzglab_user/Desktop/esv/pla hif1a parp1 2023/imaris/hypoxia/az3146/61223 PLA PARP1 HIF1A _bg_Hyp AZ Position006 Image 59_[ims1_2023-09-20T09-41-38.028].ims
1910000		2	Image 1	40	AZ DAPI.icsx_[ibrx_2023-09-20T09-41-38.028]	700001	0	AZ DAPI.icsx_[ibrx_2023-09-20T09-41-38.028]	700001	61223 PLA PARP1 HIF1A _bh_Hyp AZ Position007 Image 60_[ims1_2023-09-20T09-41-38.028].ims	/Users/mzglab_user/Desktop/esv/pla hif1a parp1 2023/imaris/hypoxia/az3146/61223 PLA PARP1 HIF1A _bh_Hyp AZ Position007 Image 60_[ims1_2023-09-20T09-41-38.028].ims
1370000		2	Image 1	41	AZ DAPI.icsx_[ibrx_2023-09-20T09-41-38.028]	700001	2	AZ DAPI.icsx_[ibrx_2023-09-20T09-41-38.028]	700001	61223 PLA PARP1 HIF1A _bh_Hyp AZ Position007 Image 60_[ims1_2023-09-20T09-41-38.028].ims	/Users/mzglab_user/Desktop/esv/pla hif1a parp1 2023/imaris/hypoxia/az3146/61223 PLA PARP1 HIF1A _bh_Hyp AZ Position007 Image 60_[ims1_2023-09-20T09-41-38.028].ims
1980000		2	Image 1	42	AZ DAPI.icsx_[ibrx_2023-09-20T09-41-38.028]	700001	4	AZ DAPI.icsx_[ibrx_2023-09-20T09-41-38.028]	700001	61223 PLA PARP1 HIF1A _bh_Hyp AZ Position007 Image 60_[ims1_2023-09-20T09-41-38.028].ims	/Users/mzglab_user/Desktop/esv/pla hif1a parp1 2023/imaris/hypoxia/az3146/61223 PLA PARP1 HIF1A _bh_Hyp AZ Position007 Image 60_[ims1_2023-09-20T09-41-38.028].ims
1320000		2	Image 1	43	AZ DAPI.icsx_[ibrx_2023-09-20T09-41-38.028]	700001	5	AZ DAPI.icsx_[ibrx_2023-09-20T09-41-38.028]	700001	61223 PLA PARP1 HIF1A _bh_Hyp AZ Position007 Image 60_[ims1_2023-09-20T09-41-38.028].ims	/Users/mzglab_user/Desktop/esv/pla hif1a parp1 2023/imaris/hypoxia/az3146/61223 PLA PARP1 HIF1A _bh_Hyp AZ Position007 Image 60_[ims1_2023-09-20T09-41-38.028].ims
2010000		2	Image 1	44	AZ DAPI.icsx_[ibrx_2023-09-20T09-41-38.028]	700001	8	AZ DAPI.icsx_[ibrx_2023-09-20T09-41-38.028]	700001	61223 PLA PARP1 HIF1A _bh_Hyp AZ Position007 Image 60_[ims1_2023-09-20T09-41-38.028].ims	/Users/mzglab_user/Desktop/esv/pla hif1a parp1 2023/imaris/hypoxia/az3146/61223 PLA PARP1 HIF1A _bh_Hyp AZ Position007 Image 60_[ims1_2023-09-20T09-41-38.028].ims
1160000		2	Image 1	45	AZ DAPI.icsx_[ibrx_2023-09-20T09-41-38.028]	700001	9	AZ DAPI.icsx_[ibrx_2023-09-20T09-41-38.028]	700001	61223 PLA PARP1 HIF1A _bh_Hyp AZ Position007 Image 60_[ims1_2023-09-20T09-41-38.028].ims	/Users/mzglab_user/Desktop/esv/pla hif1a parp1 2023/imaris/hypoxia/az3146/61223 PLA PARP1 HIF1A _bh_Hyp AZ Position007 Image 60_[ims1_2023-09-20T09-41-38.028].ims
1420000		2	Image 1	46	AZ DAPI.icsx_[ibrx_2023-09-20T09-41-38.028]	700001	10	AZ DAPI.icsx_[ibrx_2023-09-20T09-41-38.028]	700001	61223 PLA PARP1 HIF1A _bh_Hyp AZ Position007 Image 60_[ims1_2023-09-20T09-41-38.028].ims	/Users/mzglab_user/Desktop/esv/pla hif1a parp1 2023/imaris/hypoxia/az3146/61223 PLA PARP1 HIF1A _bh_Hyp AZ Position007 Image 60_[ims1_2023-09-20T09-41-38.028].ims
1620000		2	Image 1	47	AZ DAPI.icsx_[ibrx_2023-09-20T09-41-38.028]	700001	12	AZ DAPI.icsx_[ibrx_2023-09-20T09-41-38.028]	700001	61223 PLA PARP1 HIF1A _bh_Hyp AZ Position007 Image 60_[ims1_2023-09-20T09-41-38.028].ims	/Users/mzglab_user/Desktop/esv/pla hif1a parp1 2023/imaris/hypoxia/az3146/61223 PLA PARP1 HIF1A _bh_Hyp AZ Position007 Image 60_[ims1_2023-09-20T09-41-38.028].ims
517000		2	Image 1	48	AZ DAPI.icsx_[ibrx_2023-09-20T09-41-38.028]	700001	0	AZ DAPI.icsx_[ibrx_2023-09-20T09-41-38.028]	700001	61223 PLA PARP1 HIF1A _bi_Hyp AZ Position008 Image 61_[ims1_2023-09-20T09-41-38.028].ims	/Users/mzglab_user/Desktop/esv/pla hif1a parp1 2023/imaris/hypoxia/az3146/61223 PLA PARP1 HIF1A _bi_Hyp AZ Position008 Image 61_[ims1_2023-09-20T09-41-38.028].ims
2110000		2	Image 1	49	AZ DAPI.icsx_[ibrx_2023-09-20T09-41-38.028]	700001	1	AZ DAPI.icsx_[ibrx_2023-09-20T09-41-38.028]	700001	61223 PLA PARP1 HIF1A _bi_Hyp AZ Position008 Image 61_[ims1_2023-09-20T09-41-38.028].ims	/Users/mzglab_user/Desktop/esv/pla hif1a parp1 2023/imaris/hypoxia/az3146/61223 PLA PARP1 HIF1A _bi_Hyp AZ Position008 Image 61_[ims1_2023-09-20T09-41-38.028].ims
1480000		2	Image 1	50	AZ DAPI.icsx_[ibrx_2023-09-20T09-41-38.028]	700001	2	AZ DAPI.icsx_[ibrx_2023-09-20T09-41-38.028]	700001	61223 PLA PARP1 HIF1A _bi_Hyp AZ Position008 Image 61_[ims1_2023-09-20T09-41-38.028].ims	/Users/mzglab_user/Desktop/esv/pla hif1a parp1 2023/imaris/hypoxia/az3146/61223 PLA PARP1 HIF1A _bi_Hyp AZ Position008 Image 61_[ims1_2023-09-20T09-41-38.028].ims
330000		2	Image 1	51	AZ DAPI.icsx_[ibrx_2023-09-20T09-41-38.028]	700001	3	AZ DAPI.icsx_[ibrx_2023-09-20T09-41-38.028]	700001	61223 PLA PARP1 HIF1A _bi_Hyp AZ Position008 Image 61_[ims1_2023-09-20T09-41-38.028].ims	/Users/mzglab_user/Desktop/esv/pla hif1a parp1 2023/imaris/hypoxia/az3146/61223 PLA PARP1 HIF1A _bi_Hyp AZ Position008 Image 61_[ims1_2023-09-20T09-41-38.028].ims
1900000		2	Image 1	52	AZ DAPI.icsx_[ibrx_2023-09-20T09-41-38.028]	700001	4	AZ DAPI.icsx_[ibrx_2023-09-20T09-41-38.028]	700001	61223 PLA PARP1 HIF1A _bi_Hyp AZ Position008 Image 61_[ims1_2023-09-20T09-41-38.028].ims	/Users/mzglab_user/Desktop/esv/pla hif1a parp1 2023/imaris/hypoxia/az3146/61223 PLA PARP1 HIF1A _bi_Hyp AZ Position008 Image 61_[ims1_2023-09-20T09-41-38.028].ims
2230000		2	Image 1	53	AZ DAPI.icsx_[ibrx_2023-09-20T09-41-38.028]	700001	5	AZ DAPI.icsx_[ibrx_2023-09-20T09-41-38.028]	700001	61223 PLA PARP1 HIF1A _bi_Hyp AZ Position008 Image 61_[ims1_2023-09-20T09-41-38.028].ims	/Users/mzglab_user/Desktop/esv/pla hif1a parp1 2023/imaris/hypoxia/az3146/61223 PLA PARP1 HIF1A _bi_Hyp AZ Position008 Image 61_[ims1_2023-09-20T09-41-38.028].ims
1590000		2	Image 1	54	AZ DAPI.icsx_[ibrx_2023-09-20T09-41-38.028]	700001	7	AZ DAPI.icsx_[ibrx_2023-09-20T09-41-38.028]	700001	61223 PLA PARP1 HIF1A _bi_Hyp AZ Position008 Image 61_[ims1_2023-09-20T09-41-38.028].ims	/Users/mzglab_user/Desktop/esv/pla hif1a parp1 2023/imaris/hypoxia/az3146/61223 PLA PARP1 HIF1A _bi_Hyp AZ Position008 Image 61_[ims1_2023-09-20T09-41-38.028].ims
1910000		2	Image 1	55	AZ DAPI.icsx_[ibrx_2023-09-20T09-41-38.028]	700001	8	AZ DAPI.icsx_[ibrx_2023-09-20T09-41-38.028]	700001	61223 PLA PARP1 HIF1A _bi_Hyp AZ Position008 Image 61_[ims1_2023-09-20T09-41-38.028].ims	/Users/mzglab_user/Desktop/esv/pla hif1a parp1 2023/imaris/hypoxia/az3146/61223 PLA PARP1 HIF1A _bi_Hyp AZ Position008 Image 61_[ims1_2023-09-20T09-41-38.028].ims
0		2	Image 1	56	AZ DAPI.icsx_[ibrx_2023-09-20T09-41-38.028]	700001	0	AZ DAPI.icsx_[ibrx_2023-09-20T09-41-38.028]	700001	61223 PLA PARP1 HIF1A _bj_Hyp AZ Position009 Image 62_[ims1_2023-09-20T09-41-38.028].ims	/Users/mzglab_user/Desktop/esv/pla hif1a parp1 2023/imaris/hypoxia/az3146/61223 PLA PARP1 HIF1A _bj_Hyp AZ Position009 Image 62_[ims1_2023-09-20T09-41-38.028].ims
2470		2	Image 1	57	AZ DAPI.icsx_[ibrx_2023-09-20T09-41-38.028]	700001	1	AZ DAPI.icsx_[ibrx_2023-09-20T09-41-38.028]	700001	61223 PLA PARP1 HIF1A _bj_Hyp AZ Position009 Image 62_[ims1_2023-09-20T09-41-38.028].ims	/Users/mzglab_user/Desktop/esv/pla hif1a parp1 2023/imaris/hypoxia/az3146/61223 PLA PARP1 HIF1A _bj_Hyp AZ Position009 Image 62_[ims1_2023-09-20T09-41-38.028].ims
296000		2	Image 1	58	AZ DAPI.icsx_[ibrx_2023-09-20T09-41-38.028]	700001	2	AZ DAPI.icsx_[ibrx_2023-09-20T09-41-38.028]	700001	61223 PLA PARP1 HIF1A _bj_Hyp AZ Position009 Image 62_[ims1_2023-09-20T09-41-38.028].ims	/Users/mzglab_user/Desktop/esv/pla hif1a parp1 2023/imaris/hypoxia/az3146/61223 PLA PARP1 HIF1A _bj_Hyp AZ Position009 Image 62_[ims1_2023-09-20T09-41-38.028].ims
690		2	Image 1	59	AZ DAPI.icsx_[ibrx_2023-09-20T09-41-38.028]	700001	4	AZ DAPI.icsx_[ibrx_2023-09-20T09-41-38.028]	700001	61223 PLA PARP1 HIF1A _bj_Hyp AZ Position009 Image 62_[ims1_2023-09-20T09-41-38.028].ims	/Users/mzglab_user/Desktop/esv/pla hif1a parp1 2023/imaris/hypoxia/az3146/61223 PLA PARP1 HIF1A _bj_Hyp AZ Position009 Image 62_[ims1_2023-09-20T09-41-38.028].ims
47900		2	Image 1	60	AZ DAPI.icsx_[ibrx_2023-09-20T09-41-38.028]	700001	5	AZ DAPI.icsx_[ibrx_2023-09-20T09-41-38.028]	700001	61223 PLA PARP1 HIF1A _bj_Hyp AZ Position009 Image 62_[ims1_2023-09-20T09-41-38.028].ims	/Users/mzglab_user/Desktop/esv/pla hif1a parp1 2023/imaris/hypoxia/az3146/61223 PLA PARP1 HIF1A _bj_Hyp AZ Position009 Image 62_[ims1_2023-09-20T09-41-38.028].ims
99500		2	Image 1	61	AZ DAPI.icsx_[ibrx_2023-09-20T09-41-38.028]	700001	6	AZ DAPI.icsx_[ibrx_2023-09-20T09-41-38.028]	700001	61223 PLA PARP1 HIF1A _bj_Hyp AZ Position009 Image 62_[ims1_2023-09-20T09-41-38.028].ims	/Users/mzglab_user/Desktop/esv/pla hif1a parp1 2023/imaris/hypoxia/az3146/61223 PLA PARP1 HIF1A _bj_Hyp AZ Position009 Image 62_[ims1_2023-09-20T09-41-38.028].ims
144000		2	Image 1	62	AZ DAPI.icsx_[ibrx_2023-09-20T09-41-38.028]	700001	7	AZ DAPI.icsx_[ibrx_2023-09-20T09-41-38.028]	700001	61223 PLA PARP1 HIF1A _bj_Hyp AZ Position009 Image 62_[ims1_2023-09-20T09-41-38.028].ims	/Users/mzglab_user/Desktop/esv/pla hif1a parp1 2023/imaris/hypoxia/az3146/61223 PLA PARP1 HIF1A _bj_Hyp AZ Position009 Image 62_[ims1_2023-09-20T09-41-38.028].ims
22100		2	Image 1	63	AZ DAPI.icsx_[ibrx_2023-09-20T09-41-38.028]	700001	8	AZ DAPI.icsx_[ibrx_2023-09-20T09-41-38.028]	700001	61223 PLA PARP1 HIF1A _bj_Hyp AZ Position009 Image 62_[ims1_2023-09-20T09-41-38.028].ims	/Users/mzglab_user/Desktop/esv/pla hif1a parp1 2023/imaris/hypoxia/az3146/61223 PLA PARP1 HIF1A _bj_Hyp AZ Position009 Image 62_[ims1_2023-09-20T09-41-38.028].ims
55400		2	Image 1	64	AZ DAPI.icsx_[ibrx_2023-09-20T09-41-38.028]	700001	21	AZ DAPI.icsx_[ibrx_2023-09-20T09-41-38.028]	700001	61223 PLA PARP1 HIF1A _bk_Hyp AZ Position003 Image 63_[ims1_2023-09-20T09-41-38.028].ims	/Users/mzglab_user/Desktop/esv/pla hif1a parp1 2023/imaris/hypoxia/az3146/61223 PLA PARP1 HIF1A _bk_Hyp AZ Position003 Image 63_[ims1_2023-09-20T09-41-38.028].ims
99600		2	Image 1	65	AZ DAPI.icsx_[ibrx_2023-09-20T09-41-38.028]	700001	25	AZ DAPI.icsx_[ibrx_2023-09-20T09-41-38.028]	700001	61223 PLA PARP1 HIF1A _bk_Hyp AZ Position003 Image 63_[ims1_2023-09-20T09-41-38.028].ims	/Users/mzglab_user/Desktop/esv/pla hif1a parp1 2023/imaris/hypoxia/az3146/61223 PLA PARP1 HIF1A _bk_Hyp AZ Position003 Image 63_[ims1_2023-09-20T09-41-38.028].ims
3087		2	Image 1	66	AZ DAPI.icsx_[ibrx_2023-09-20T09-41-38.028]	700001	29	AZ DAPI.icsx_[ibrx_2023-09-20T09-41-38.028]	700001	61223 PLA PARP1 HIF1A _bk_Hyp AZ Position003 Image 63_[ims1_2023-09-20T09-41-38.028].ims	/Users/mzglab_user/Desktop/esv/pla hif1a parp1 2023/imaris/hypoxia/az3146/61223 PLA PARP1 HIF1A _bk_Hyp AZ Position003 Image 63_[ims1_2023-09-20T09-41-38.028].ims
56300		2	Image 1	67	AZ DAPI.icsx_[ibrx_2023-09-20T09-41-38.028]	700001	31	AZ DAPI.icsx_[ibrx_2023-09-20T09-41-38.028]	700001	61223 PLA PARP1 HIF1A _bk_Hyp AZ Position003 Image 63_[ims1_2023-09-20T09-41-38.028].ims	/Users/mzglab_user/Desktop/esv/pla hif1a parp1 2023/imaris/hypoxia/az3146/61223 PLA PARP1 HIF1A _bk_Hyp AZ Position003 Image 63_[ims1_2023-09-20T09-41-38.028].ims
33100		2	Image 1	68	AZ DAPI.icsx_[ibrx_2023-09-20T09-41-38.028]	700001	38	AZ DAPI.icsx_[ibrx_2023-09-20T09-41-38.028]	700001	61223 PLA PARP1 HIF1A _bk_Hyp AZ Position003 Image 63_[ims1_2023-09-20T09-41-38.028].ims	/Users/mzglab_user/Desktop/esv/pla hif1a parp1 2023/imaris/hypoxia/az3146/61223 PLA PARP1 HIF1A _bk_Hyp AZ Position003 Image 63_[ims1_2023-09-20T09-41-38.028].ims
20700		2	Image 1	69	AZ DAPI.icsx_[ibrx_2023-09-20T09-41-38.028]	700001	49	AZ DAPI.icsx_[ibrx_2023-09-20T09-41-38.028]	700001	61223 PLA PARP1 HIF1A _bk_Hyp AZ Position003 Image 63_[ims1_2023-09-20T09-41-38.028].ims	/Users/mzglab_user/Desktop/esv/pla hif1a parp1 2023/imaris/hypoxia/az3146/61223 PLA PARP1 HIF1A _bk_Hyp AZ Position003 Image 63_[ims1_2023-09-20T09-41-38.028].ims
115000		2	Image 1	70	AZ DAPI.icsx_[ibrx_2023-09-20T09-41-38.028]	700001	56	AZ DAPI.icsx_[ibrx_2023-09-20T09-41-38.028]	700001	61223 PLA PARP1 HIF1A _bk_Hyp AZ Position003 Image 63_[ims1_2023-09-20T09-41-38.028].ims	/Users/mzglab_user/Desktop/esv/pla hif1a parp1 2023/imaris/hypoxia/az3146/61223 PLA PARP1 HIF1A _bk_Hyp AZ Position003 Image 63_[ims1_2023-09-20T09-41-38.028].ims
32800		2	Image 1	71	AZ DAPI.icsx_[ibrx_2023-09-20T09-41-38.028]	700001	65	AZ DAPI.icsx_[ibrx_2023-09-20T09-41-38.028]	700001	61223 PLA PARP1 HIF1A _bk_Hyp AZ Position003 Image 63_[ims1_2023-09-20T09-41-38.028].ims	/Users/mzglab_user/Desktop/esv/pla hif1a parp1 2023/imaris/hypoxia/az3146/61223 PLA PARP1 HIF1A _bk_Hyp AZ Position003 Image 63_[ims1_2023-09-20T09-41-38.028].ims
2760000		2	Image 1	72	AZ DAPI.icsx_[ibrx_2023-09-20T09-41-38.028]	700001	3	AZ DAPI.icsx_[ibrx_2023-09-20T09-41-38.028]	700001	61223 PLA PARP1 HIF1A _bl_Hyp AZ Position010 Image 64_[ims1_2023-09-20T09-41-38.028].ims	/Users/mzglab_user/Desktop/esv/pla hif1a parp1 2023/imaris/hypoxia/az3146/61223 PLA PARP1 HIF1A _bl_Hyp AZ Position010 Image 64_[ims1_2023-09-20T09-41-38.028].ims
3370000		2	Image 1	73	AZ DAPI.icsx_[ibrx_2023-09-20T09-41-38.028]	700001	10	AZ DAPI.icsx_[ibrx_2023-09-20T09-41-38.028]	700001	61223 PLA PARP1 HIF1A _bl_Hyp AZ Position010 Image 64_[ims1_2023-09-20T09-41-38.028].ims	/Users/mzglab_user/Desktop/esv/pla hif1a parp1 2023/imaris/hypoxia/az3146/61223 PLA PARP1 HIF1A _bl_Hyp AZ Position010 Image 64_[ims1_2023-09-20T09-41-38.028].ims
3180000		2	Image 1	74	AZ DAPI.icsx_[ibrx_2023-09-20T09-41-38.028]	700001	13	AZ DAPI.icsx_[ibrx_2023-09-20T09-41-38.028]	700001	61223 PLA PARP1 HIF1A _bl_Hyp AZ Position010 Image 64_[ims1_2023-09-20T09-41-38.028].ims	/Users/mzglab_user/Desktop/esv/pla hif1a parp1 2023/imaris/hypoxia/az3146/61223 PLA PARP1 HIF1A _bl_Hyp AZ Position010 Image 64_[ims1_2023-09-20T09-41-38.028].ims
1520000		2	Image 1	75	AZ DAPI.icsx_[ibrx_2023-09-20T09-41-38.028]	700001	15	AZ DAPI.icsx_[ibrx_2023-09-20T09-41-38.028]	700001	61223 PLA PARP1 HIF1A _bl_Hyp AZ Position010 Image 64_[ims1_2023-09-20T09-41-38.028].ims	/Users/mzglab_user/Desktop/esv/pla hif1a parp1 2023/imaris/hypoxia/az3146/61223 PLA PARP1 HIF1A _bl_Hyp AZ Position010 Image 64_[ims1_2023-09-20T09-41-38.028].ims
3060000		2	Image 1	76	AZ DAPI.icsx_[ibrx_2023-09-20T09-41-38.028]	700001	19	AZ DAPI.icsx_[ibrx_2023-09-20T09-41-38.028]	700001	61223 PLA PARP1 HIF1A _bl_Hyp AZ Position010 Image 64_[ims1_2023-09-20T09-41-38.028].ims	/Users/mzglab_user/Desktop/esv/pla hif1a parp1 2023/imaris/hypoxia/az3146/61223 PLA PARP1 HIF1A _bl_Hyp AZ Position010 Image 64_[ims1_2023-09-20T09-41-38.028].ims
3160000		2	Image 1	77	AZ DAPI.icsx_[ibrx_2023-09-20T09-41-38.028]	700001	20	AZ DAPI.icsx_[ibrx_2023-09-20T09-41-38.028]	700001	61223 PLA PARP1 HIF1A _bl_Hyp AZ Position010 Image 64_[ims1_2023-09-20T09-41-38.028].ims	/Users/mzglab_user/Desktop/esv/pla hif1a parp1 2023/imaris/hypoxia/az3146/61223 PLA PARP1 HIF1A _bl_Hyp AZ Position010 Image 64_[ims1_2023-09-20T09-41-38.028].ims
2590000		2	Image 1	78	AZ DAPI.icsx_[ibrx_2023-09-20T09-41-38.028]	700001	21	AZ DAPI.icsx_[ibrx_2023-09-20T09-41-38.028]	700001	61223 PLA PARP1 HIF1A _bl_Hyp AZ Position010 Image 64_[ims1_2023-09-20T09-41-38.028].ims	/Users/mzglab_user/Desktop/esv/pla hif1a parp1 2023/imaris/hypoxia/az3146/61223 PLA PARP1 HIF1A _bl_Hyp AZ Position010 Image 64_[ims1_2023-09-20T09-41-38.028].ims
2360000		2	Image 1	79	AZ DAPI.icsx_[ibrx_2023-09-20T09-41-38.028]	700001	23	AZ DAPI.icsx_[ibrx_2023-09-20T09-41-38.028]	700001	61223 PLA PARP1 HIF1A _bl_Hyp AZ Position010 Image 64_[ims1_2023-09-20T09-41-38.028].ims	/Users/mzglab_user/Desktop/esv/pla hif1a parp1 2023/imaris/hypoxia/az3146/61223 PLA PARP1 HIF1A _bl_Hyp AZ Position010 Image 64_[ims1_2023-09-20T09-41-38.028].ims
4870000		2	Image 1	80	AZ DAPI.icsx_[ibrx_2023-09-20T09-41-38.028]	700001	0	AZ DAPI.icsx_[ibrx_2023-09-20T09-41-38.028]	700001	61223 PLA PARP1 HIF1A _bm_Hyp AZ Position011 Image 65_[ims1_2023-09-20T09-41-38.028].ims	/Users/mzglab_user/Desktop/esv/pla hif1a parp1 2023/imaris/hypoxia/az3146/61223 PLA PARP1 HIF1A _bm_Hyp AZ Position011 Image 65_[ims1_2023-09-20T09-41-38.028].ims
3890000		2	Image 1	81	AZ DAPI.icsx_[ibrx_2023-09-20T09-41-38.028]	700001	3	AZ DAPI.icsx_[ibrx_2023-09-20T09-41-38.028]	700001	61223 PLA PARP1 HIF1A _bm_Hyp AZ Position011 Image 65_[ims1_2023-09-20T09-41-38.028].ims	/Users/mzglab_user/Desktop/esv/pla hif1a parp1 2023/imaris/hypoxia/az3146/61223 PLA PARP1 HIF1A _bm_Hyp AZ Position011 Image 65_[ims1_2023-09-20T09-41-38.028].ims
3890000		2	Image 1	82	AZ DAPI.icsx_[ibrx_2023-09-20T09-41-38.028]	700001	4	AZ DAPI.icsx_[ibrx_2023-09-20T09-41-38.028]	700001	61223 PLA PARP1 HIF1A _bm_Hyp AZ Position011 Image 65_[ims1_2023-09-20T09-41-38.028].ims	/Users/mzglab_user/Desktop/esv/pla hif1a parp1 2023/imaris/hypoxia/az3146/61223 PLA PARP1 HIF1A _bm_Hyp AZ Position011 Image 65_[ims1_2023-09-20T09-41-38.028].ims
2550000		2	Image 1	83	AZ DAPI.icsx_[ibrx_2023-09-20T09-41-38.028]	700001	13	AZ DAPI.icsx_[ibrx_2023-09-20T09-41-38.028]	700001	61223 PLA PARP1 HIF1A _bm_Hyp AZ Position011 Image 65_[ims1_2023-09-20T09-41-38.028].ims	/Users/mzglab_user/Desktop/esv/pla hif1a parp1 2023/imaris/hypoxia/az3146/61223 PLA PARP1 HIF1A _bm_Hyp AZ Position011 Image 65_[ims1_2023-09-20T09-41-38.028].ims
2350000		2	Image 1	84	AZ DAPI.icsx_[ibrx_2023-09-20T09-41-38.028]	700001	29	AZ DAPI.icsx_[ibrx_2023-09-20T09-41-38.028]	700001	61223 PLA PARP1 HIF1A _bm_Hyp AZ Position011 Image 65_[ims1_2023-09-20T09-41-38.028].ims	/Users/mzglab_user/Desktop/esv/pla hif1a parp1 2023/imaris/hypoxia/az3146/61223 PLA PARP1 HIF1A _bm_Hyp AZ Position011 Image 65_[ims1_2023-09-20T09-41-38.028].ims
5600000		2	Image 1	85	AZ DAPI.icsx_[ibrx_2023-09-20T09-41-38.028]	700001	31	AZ DAPI.icsx_[ibrx_2023-09-20T09-41-38.028]	700001	61223 PLA PARP1 HIF1A _bm_Hyp AZ Position011 Image 65_[ims1_2023-09-20T09-41-38.028].ims	/Users/mzglab_user/Desktop/esv/pla hif1a parp1 2023/imaris/hypoxia/az3146/61223 PLA PARP1 HIF1A _bm_Hyp AZ Position011 Image 65_[ims1_2023-09-20T09-41-38.028].ims
2860000		2	Image 1	86	AZ DAPI.icsx_[ibrx_2023-09-20T09-41-38.028]	700001	37	AZ DAPI.icsx_[ibrx_2023-09-20T09-41-38.028]	700001	61223 PLA PARP1 HIF1A _bm_Hyp AZ Position011 Image 65_[ims1_2023-09-20T09-41-38.028].ims	/Users/mzglab_user/Desktop/esv/pla hif1a parp1 2023/imaris/hypoxia/az3146/61223 PLA PARP1 HIF1A _bm_Hyp AZ Position011 Image 65_[ims1_2023-09-20T09-41-38.028].ims
6640000		2	Image 1	87	AZ DAPI.icsx_[ibrx_2023-09-20T09-41-38.028]	700001	41	AZ DAPI.icsx_[ibrx_2023-09-20T09-41-38.028]	700001	61223 PLA PARP1 HIF1A _bm_Hyp AZ Position011 Image 65_[ims1_2023-09-20T09-41-38.028].ims	/Users/mzglab_user/Desktop/esv/pla hif1a parp1 2023/imaris/hypoxia/az3146/61223 PLA PARP1 HIF1A _bm_Hyp AZ Position011 Image 65_[ims1_2023-09-20T09-41-38.028].ims
8450		2	Image 1	88	AZ DAPI.icsx_[ibrx_2023-09-20T09-41-38.028]	700001	0	AZ DAPI.icsx_[ibrx_2023-09-20T09-41-38.028]	700001	61223 PLA PARP1 HIF1A _bn_Hyp AZ Position012 Image 66_[ims1_2023-09-20T09-41-38.028].ims	/Users/mzglab_user/Desktop/esv/pla hif1a parp1 2023/imaris/hypoxia/az3146/61223 PLA PARP1 HIF1A _bn_Hyp AZ Position012 Image 66_[ims1_2023-09-20T09-41-38.028].ims
24000		2	Image 1	89	AZ DAPI.icsx_[ibrx_2023-09-20T09-41-38.028]	700001	1	AZ DAPI.icsx_[ibrx_2023-09-20T09-41-38.028]	700001	61223 PLA PARP1 HIF1A _bn_Hyp AZ Position012 Image 66_[ims1_2023-09-20T09-41-38.028].ims	/Users/mzglab_user/Desktop/esv/pla hif1a parp1 2023/imaris/hypoxia/az3146/61223 PLA PARP1 HIF1A _bn_Hyp AZ Position012 Image 66_[ims1_2023-09-20T09-41-38.028].ims
2329		2	Image 1	90	AZ DAPI.icsx_[ibrx_2023-09-20T09-41-38.028]	700001	2	AZ DAPI.icsx_[ibrx_2023-09-20T09-41-38.028]	700001	61223 PLA PARP1 HIF1A _bn_Hyp AZ Position012 Image 66_[ims1_2023-09-20T09-41-38.028].ims	/Users/mzglab_user/Desktop/esv/pla hif1a parp1 2023/imaris/hypoxia/az3146/61223 PLA PARP1 HIF1A _bn_Hyp AZ Position012 Image 66_[ims1_2023-09-20T09-41-38.028].ims
5977		2	Image 1	91	AZ DAPI.icsx_[ibrx_2023-09-20T09-41-38.028]	700001	3	AZ DAPI.icsx_[ibrx_2023-09-20T09-41-38.028]	700001	61223 PLA PARP1 HIF1A _bn_Hyp AZ Position012 Image 66_[ims1_2023-09-20T09-41-38.028].ims	/Users/mzglab_user/Desktop/esv/pla hif1a parp1 2023/imaris/hypoxia/az3146/61223 PLA PARP1 HIF1A _bn_Hyp AZ Position012 Image 66_[ims1_2023-09-20T09-41-38.028].ims
34600		2	Image 1	92	AZ DAPI.icsx_[ibrx_2023-09-20T09-41-38.028]	700001	4	AZ DAPI.icsx_[ibrx_2023-09-20T09-41-38.028]	700001	61223 PLA PARP1 HIF1A _bn_Hyp AZ Position012 Image 66_[ims1_2023-09-20T09-41-38.028].ims	/Users/mzglab_user/Desktop/esv/pla hif1a parp1 2023/imaris/hypoxia/az3146/61223 PLA PARP1 HIF1A _bn_Hyp AZ Position012 Image 66_[ims1_2023-09-20T09-41-38.028].ims
35200		2	Image 1	93	AZ DAPI.icsx_[ibrx_2023-09-20T09-41-38.028]	700001	5	AZ DAPI.icsx_[ibrx_2023-09-20T09-41-38.028]	700001	61223 PLA PARP1 HIF1A _bn_Hyp AZ Position012 Image 66_[ims1_2023-09-20T09-41-38.028].ims	/Users/mzglab_user/Desktop/esv/pla hif1a parp1 2023/imaris/hypoxia/az3146/61223 PLA PARP1 HIF1A _bn_Hyp AZ Position012 Image 66_[ims1_2023-09-20T09-41-38.028].ims
71700		2	Image 1	94	AZ DAPI.icsx_[ibrx_2023-09-20T09-41-38.028]	700001	6	AZ DAPI.icsx_[ibrx_2023-09-20T09-41-38.028]	700001	61223 PLA PARP1 HIF1A _bn_Hyp AZ Position012 Image 66_[ims1_2023-09-20T09-41-38.028].ims	/Users/mzglab_user/Desktop/esv/pla hif1a parp1 2023/imaris/hypoxia/az3146/61223 PLA PARP1 HIF1A _bn_Hyp AZ Position012 Image 66_[ims1_2023-09-20T09-41-38.028].ims
32000		2	Image 1	95	AZ DAPI.icsx_[ibrx_2023-09-20T09-41-38.028]	700001	7	AZ DAPI.icsx_[ibrx_2023-09-20T09-41-38.028]	700001	61223 PLA PARP1 HIF1A _bn_Hyp AZ Position012 Image 66_[ims1_2023-09-20T09-41-38.028].ims	/Users/mzglab_user/Desktop/esv/pla hif1a parp1 2023/imaris/hypoxia/az3146/61223 PLA PARP1 HIF1A _bn_Hyp AZ Position012 Image 66_[ims1_2023-09-20T09-41-38.028].ims
1620000		2	Image 1	96	AZ DAPI.icsx_[ibrx_2023-09-20T09-41-38.028]	700001	0	AZ DAPI.icsx_[ibrx_2023-09-20T09-41-38.028]	700001	61223 PLA PARP1 HIF1A _bo_Hyp AZ Position013 Image 67_[ims1_2023-09-20T09-41-38.028].ims	/Users/mzglab_user/Desktop/esv/pla hif1a parp1 2023/imaris/hypoxia/az3146/61223 PLA PARP1 HIF1A _bo_Hyp AZ Position013 Image 67_[ims1_2023-09-20T09-41-38.028].ims
1960000		2	Image 1	97	AZ DAPI.icsx_[ibrx_2023-09-20T09-41-38.028]	700001	1	AZ DAPI.icsx_[ibrx_2023-09-20T09-41-38.028]	700001	61223 PLA PARP1 HIF1A _bo_Hyp AZ Position013 Image 67_[ims1_2023-09-20T09-41-38.028].ims	/Users/mzglab_user/Desktop/esv/pla hif1a parp1 2023/imaris/hypoxia/az3146/61223 PLA PARP1 HIF1A _bo_Hyp AZ Position013 Image 67_[ims1_2023-09-20T09-41-38.028].ims
2210000		2	Image 1	98	AZ DAPI.icsx_[ibrx_2023-09-20T09-41-38.028]	700001	2	AZ DAPI.icsx_[ibrx_2023-09-20T09-41-38.028]	700001	61223 PLA PARP1 HIF1A _bo_Hyp AZ Position013 Image 67_[ims1_2023-09-20T09-41-38.028].ims	/Users/mzglab_user/Desktop/esv/pla hif1a parp1 2023/imaris/hypoxia/az3146/61223 PLA PARP1 HIF1A _bo_Hyp AZ Position013 Image 67_[ims1_2023-09-20T09-41-38.028].ims
1540000		2	Image 1	99	AZ DAPI.icsx_[ibrx_2023-09-20T09-41-38.028]	700001	3	AZ DAPI.icsx_[ibrx_2023-09-20T09-41-38.028]	700001	61223 PLA PARP1 HIF1A _bo_Hyp AZ Position013 Image 67_[ims1_2023-09-20T09-41-38.028].ims	/Users/mzglab_user/Desktop/esv/pla hif1a parp1 2023/imaris/hypoxia/az3146/61223 PLA PARP1 HIF1A _bo_Hyp AZ Position013 Image 67_[ims1_2023-09-20T09-41-38.028].ims
1250000		2	Image 1	100	AZ DAPI.icsx_[ibrx_2023-09-20T09-41-38.028]	700001	4	AZ DAPI.icsx_[ibrx_2023-09-20T09-41-38.028]	700001	61223 PLA PARP1 HIF1A _bo_Hyp AZ Position013 Image 67_[ims1_2023-09-20T09-41-38.028].ims	/Users/mzglab_user/Desktop/esv/pla hif1a parp1 2023/imaris/hypoxia/az3146/61223 PLA PARP1 HIF1A _bo_Hyp AZ Position013 Image 67_[ims1_2023-09-20T09-41-38.028].ims
3630000		2	Image 1	101	AZ DAPI.icsx_[ibrx_2023-09-20T09-41-38.028]	700001	5	AZ DAPI.icsx_[ibrx_2023-09-20T09-41-38.028]	700001	61223 PLA PARP1 HIF1A _bo_Hyp AZ Position013 Image 67_[ims1_2023-09-20T09-41-38.028].ims	/Users/mzglab_user/Desktop/esv/pla hif1a parp1 2023/imaris/hypoxia/az3146/61223 PLA PARP1 HIF1A _bo_Hyp AZ Position013 Image 67_[ims1_2023-09-20T09-41-38.028].ims
2550000		2	Image 1	102	AZ DAPI.icsx_[ibrx_2023-09-20T09-41-38.028]	700001	7	AZ DAPI.icsx_[ibrx_2023-09-20T09-41-38.028]	700001	61223 PLA PARP1 HIF1A _bo_Hyp AZ Position013 Image 67_[ims1_2023-09-20T09-41-38.028].ims	/Users/mzglab_user/Desktop/esv/pla hif1a parp1 2023/imaris/hypoxia/az3146/61223 PLA PARP1 HIF1A _bo_Hyp AZ Position013 Image 67_[ims1_2023-09-20T09-41-38.028].ims
3000000		2	Image 1	103	AZ DAPI.icsx_[ibrx_2023-09-20T09-41-38.028]	700001	11	AZ DAPI.icsx_[ibrx_2023-09-20T09-41-38.028]	700001	61223 PLA PARP1 HIF1A _bo_Hyp AZ Position013 Image 67_[ims1_2023-09-20T09-41-38.028].ims	/Users/mzglab_user/Desktop/esv/pla hif1a parp1 2023/imaris/hypoxia/az3146/61223 PLA PARP1 HIF1A _bo_Hyp AZ Position013 Image 67_[ims1_2023-09-20T09-41-38.028].ims
184000		2	Image 1	104	AZ DAPI.icsx_[ibrx_2023-09-20T09-41-38.028]	700001	1	AZ DAPI.icsx_[ibrx_2023-09-20T09-41-38.028]	700001	61223 PLA PARP1 HIF1A _bp_Hyp AZ Position014 Image 68_[ims1_2023-09-20T09-41-38.028].ims	/Users/mzglab_user/Desktop/esv/pla hif1a parp1 2023/imaris/hypoxia/az3146/61223 PLA PARP1 HIF1A _bp_Hyp AZ Position014 Image 68_[ims1_2023-09-20T09-41-38.028].ims
510000		2	Image 1	105	AZ DAPI.icsx_[ibrx_2023-09-20T09-41-38.028]	700001	2	AZ DAPI.icsx_[ibrx_2023-09-20T09-41-38.028]	700001	61223 PLA PARP1 HIF1A _bp_Hyp AZ Position014 Image 68_[ims1_2023-09-20T09-41-38.028].ims	/Users/mzglab_user/Desktop/esv/pla hif1a parp1 2023/imaris/hypoxia/az3146/61223 PLA PARP1 HIF1A _bp_Hyp AZ Position014 Image 68_[ims1_2023-09-20T09-41-38.028].ims
144000		2	Image 1	106	AZ DAPI.icsx_[ibrx_2023-09-20T09-41-38.028]	700001	3	AZ DAPI.icsx_[ibrx_2023-09-20T09-41-38.028]	700001	61223 PLA PARP1 HIF1A _bp_Hyp AZ Position014 Image 68_[ims1_2023-09-20T09-41-38.028].ims	/Users/mzglab_user/Desktop/esv/pla hif1a parp1 2023/imaris/hypoxia/az3146/61223 PLA PARP1 HIF1A _bp_Hyp AZ Position014 Image 68_[ims1_2023-09-20T09-41-38.028].ims
12200		2	Image 1	107	AZ DAPI.icsx_[ibrx_2023-09-20T09-41-38.028]	700001	4	AZ DAPI.icsx_[ibrx_2023-09-20T09-41-38.028]	700001	61223 PLA PARP1 HIF1A _bp_Hyp AZ Position014 Image 68_[ims1_2023-09-20T09-41-38.028].ims	/Users/mzglab_user/Desktop/esv/pla hif1a parp1 2023/imaris/hypoxia/az3146/61223 PLA PARP1 HIF1A _bp_Hyp AZ Position014 Image 68_[ims1_2023-09-20T09-41-38.028].ims
168000		2	Image 1	108	AZ DAPI.icsx_[ibrx_2023-09-20T09-41-38.028]	700001	5	AZ DAPI.icsx_[ibrx_2023-09-20T09-41-38.028]	700001	61223 PLA PARP1 HIF1A _bp_Hyp AZ Position014 Image 68_[ims1_2023-09-20T09-41-38.028].ims	/Users/mzglab_user/Desktop/esv/pla hif1a parp1 2023/imaris/hypoxia/az3146/61223 PLA PARP1 HIF1A _bp_Hyp AZ Position014 Image 68_[ims1_2023-09-20T09-41-38.028].ims
196000		2	Image 1	109	AZ DAPI.icsx_[ibrx_2023-09-20T09-41-38.028]	700001	6	AZ DAPI.icsx_[ibrx_2023-09-20T09-41-38.028]	700001	61223 PLA PARP1 HIF1A _bp_Hyp AZ Position014 Image 68_[ims1_2023-09-20T09-41-38.028].ims	/Users/mzglab_user/Desktop/esv/pla hif1a parp1 2023/imaris/hypoxia/az3146/61223 PLA PARP1 HIF1A _bp_Hyp AZ Position014 Image 68_[ims1_2023-09-20T09-41-38.028].ims
139000		2	Image 1	110	AZ DAPI.icsx_[ibrx_2023-09-20T09-41-38.028]	700001	7	AZ DAPI.icsx_[ibrx_2023-09-20T09-41-38.028]	700001	61223 PLA PARP1 HIF1A _bp_Hyp AZ Position014 Image 68_[ims1_2023-09-20T09-41-38.028].ims	/Users/mzglab_user/Desktop/esv/pla hif1a parp1 2023/imaris/hypoxia/az3146/61223 PLA PARP1 HIF1A _bp_Hyp AZ Position014 Image 68_[ims1_2023-09-20T09-41-38.028].ims
190000		2	Image 1	111	AZ DAPI.icsx_[ibrx_2023-09-20T09-41-38.028]	700001	8	AZ DAPI.icsx_[ibrx_2023-09-20T09-41-38.028]	700001	61223 PLA PARP1 HIF1A _bp_Hyp AZ Position014 Image 68_[ims1_2023-09-20T09-41-38.028].ims	/Users/mzglab_user/Desktop/esv/pla hif1a parp1 2023/imaris/hypoxia/az3146/61223 PLA PARP1 HIF1A _bp_Hyp AZ Position014 Image 68_[ims1_2023-09-20T09-41-38.028].ims
3720000		2	Image 1	112	AZ DAPI.icsx_[ibrx_2023-09-20T09-41-38.028]	700001	5	AZ DAPI.icsx_[ibrx_2023-09-20T09-41-38.028]	700001	61223 PLA PARP1 HIF1A _bq_Hyp AZ Position015 Image 69_[ims1_2023-09-20T09-41-38.028].ims	/Users/mzglab_user/Desktop/esv/pla hif1a parp1 2023/imaris/hypoxia/az3146/61223 PLA PARP1 HIF1A _bq_Hyp AZ Position015 Image 69_[ims1_2023-09-20T09-41-38.028].ims
2430000		2	Image 1	113	AZ DAPI.icsx_[ibrx_2023-09-20T09-41-38.028]	700001	10	AZ DAPI.icsx_[ibrx_2023-09-20T09-41-38.028]	700001	61223 PLA PARP1 HIF1A _bq_Hyp AZ Position015 Image 69_[ims1_2023-09-20T09-41-38.028].ims	/Users/mzglab_user/Desktop/esv/pla hif1a parp1 2023/imaris/hypoxia/az3146/61223 PLA PARP1 HIF1A _bq_Hyp AZ Position015 Image 69_[ims1_2023-09-20T09-41-38.028].ims
2910000		2	Image 1	114	AZ DAPI.icsx_[ibrx_2023-09-20T09-41-38.028]	700001	12	AZ DAPI.icsx_[ibrx_2023-09-20T09-41-38.028]	700001	61223 PLA PARP1 HIF1A _bq_Hyp AZ Position015 Image 69_[ims1_2023-09-20T09-41-38.028].ims	/Users/mzglab_user/Desktop/esv/pla hif1a parp1 2023/imaris/hypoxia/az3146/61223 PLA PARP1 HIF1A _bq_Hyp AZ Position015 Image 69_[ims1_2023-09-20T09-41-38.028].ims
5120000		2	Image 1	115	AZ DAPI.icsx_[ibrx_2023-09-20T09-41-38.028]	700001	25	AZ DAPI.icsx_[ibrx_2023-09-20T09-41-38.028]	700001	61223 PLA PARP1 HIF1A _bq_Hyp AZ Position015 Image 69_[ims1_2023-09-20T09-41-38.028].ims	/Users/mzglab_user/Desktop/esv/pla hif1a parp1 2023/imaris/hypoxia/az3146/61223 PLA PARP1 HIF1A _bq_Hyp AZ Position015 Image 69_[ims1_2023-09-20T09-41-38.028].ims
3730000		2	Image 1	116	AZ DAPI.icsx_[ibrx_2023-09-20T09-41-38.028]	700001	26	AZ DAPI.icsx_[ibrx_2023-09-20T09-41-38.028]	700001	61223 PLA PARP1 HIF1A _bq_Hyp AZ Position015 Image 69_[ims1_2023-09-20T09-41-38.028].ims	/Users/mzglab_user/Desktop/esv/pla hif1a parp1 2023/imaris/hypoxia/az3146/61223 PLA PARP1 HIF1A _bq_Hyp AZ Position015 Image 69_[ims1_2023-09-20T09-41-38.028].ims
4170000		2	Image 1	117	AZ DAPI.icsx_[ibrx_2023-09-20T09-41-38.028]	700001	28	AZ DAPI.icsx_[ibrx_2023-09-20T09-41-38.028]	700001	61223 PLA PARP1 HIF1A _bq_Hyp AZ Position015 Image 69_[ims1_2023-09-20T09-41-38.028].ims	/Users/mzglab_user/Desktop/esv/pla hif1a parp1 2023/imaris/hypoxia/az3146/61223 PLA PARP1 HIF1A _bq_Hyp AZ Position015 Image 69_[ims1_2023-09-20T09-41-38.028].ims
3190000		2	Image 1	118	AZ DAPI.icsx_[ibrx_2023-09-20T09-41-38.028]	700001	29	AZ DAPI.icsx_[ibrx_2023-09-20T09-41-38.028]	700001	61223 PLA PARP1 HIF1A _bq_Hyp AZ Position015 Image 69_[ims1_2023-09-20T09-41-38.028].ims	/Users/mzglab_user/Desktop/esv/pla hif1a parp1 2023/imaris/hypoxia/az3146/61223 PLA PARP1 HIF1A _bq_Hyp AZ Position015 Image 69_[ims1_2023-09-20T09-41-38.028].ims
2500000		2	Image 1	119	AZ DAPI.icsx_[ibrx_2023-09-20T09-41-38.028]	700001	30	AZ DAPI.icsx_[ibrx_2023-09-20T09-41-38.028]	700001	61223 PLA PARP1 HIF1A _bq_Hyp AZ Position015 Image 69_[ims1_2023-09-20T09-41-38.028].ims	/Users/mzglab_user/Desktop/esv/pla hif1a parp1 2023/imaris/hypoxia/az3146/61223 PLA PARP1 HIF1A _bq_Hyp AZ Position015 Image 69_[ims1_2023-09-20T09-41-38.028].ims
95800		2	Image 1	120	AZ DAPI.icsx_[ibrx_2023-09-20T09-41-38.028]	700001	2	AZ DAPI.icsx_[ibrx_2023-09-20T09-41-38.028]	700001	61223 PLA PARP1 HIF1A _br_Hyp AZ Position016 Image 70_[ims1_2023-09-20T09-41-38.028].ims	/Users/mzglab_user/Desktop/esv/pla hif1a parp1 2023/imaris/hypoxia/az3146/61223 PLA PARP1 HIF1A _br_Hyp AZ Position016 Image 70_[ims1_2023-09-20T09-41-38.028].ims
64300		2	Image 1	121	AZ DAPI.icsx_[ibrx_2023-09-20T09-41-38.028]	700001	3	AZ DAPI.icsx_[ibrx_2023-09-20T09-41-38.028]	700001	61223 PLA PARP1 HIF1A _br_Hyp AZ Position016 Image 70_[ims1_2023-09-20T09-41-38.028].ims	/Users/mzglab_user/Desktop/esv/pla hif1a parp1 2023/imaris/hypoxia/az3146/61223 PLA PARP1 HIF1A _br_Hyp AZ Position016 Image 70_[ims1_2023-09-20T09-41-38.028].ims
26000		2	Image 1	122	AZ DAPI.icsx_[ibrx_2023-09-20T09-41-38.028]	700001	4	AZ DAPI.icsx_[ibrx_2023-09-20T09-41-38.028]	700001	61223 PLA PARP1 HIF1A _br_Hyp AZ Position016 Image 70_[ims1_2023-09-20T09-41-38.028].ims	/Users/mzglab_user/Desktop/esv/pla hif1a parp1 2023/imaris/hypoxia/az3146/61223 PLA PARP1 HIF1A _br_Hyp AZ Position016 Image 70_[ims1_2023-09-20T09-41-38.028].ims
49400		2	Image 1	123	AZ DAPI.icsx_[ibrx_2023-09-20T09-41-38.028]	700001	5	AZ DAPI.icsx_[ibrx_2023-09-20T09-41-38.028]	700001	61223 PLA PARP1 HIF1A _br_Hyp AZ Position016 Image 70_[ims1_2023-09-20T09-41-38.028].ims	/Users/mzglab_user/Desktop/esv/pla hif1a parp1 2023/imaris/hypoxia/az3146/61223 PLA PARP1 HIF1A _br_Hyp AZ Position016 Image 70_[ims1_2023-09-20T09-41-38.028].ims
85400		2	Image 1	124	AZ DAPI.icsx_[ibrx_2023-09-20T09-41-38.028]	700001	6	AZ DAPI.icsx_[ibrx_2023-09-20T09-41-38.028]	700001	61223 PLA PARP1 HIF1A _br_Hyp AZ Position016 Image 70_[ims1_2023-09-20T09-41-38.028].ims	/Users/mzglab_user/Desktop/esv/pla hif1a parp1 2023/imaris/hypoxia/az3146/61223 PLA PARP1 HIF1A _br_Hyp AZ Position016 Image 70_[ims1_2023-09-20T09-41-38.028].ims
27900		2	Image 1	125	AZ DAPI.icsx_[ibrx_2023-09-20T09-41-38.028]	700001	7	AZ DAPI.icsx_[ibrx_2023-09-20T09-41-38.028]	700001	61223 PLA PARP1 HIF1A _br_Hyp AZ Position016 Image 70_[ims1_2023-09-20T09-41-38.028].ims	/Users/mzglab_user/Desktop/esv/pla hif1a parp1 2023/imaris/hypoxia/az3146/61223 PLA PARP1 HIF1A _br_Hyp AZ Position016 Image 70_[ims1_2023-09-20T09-41-38.028].ims
24900		2	Image 1	126	AZ DAPI.icsx_[ibrx_2023-09-20T09-41-38.028]	700001	8	AZ DAPI.icsx_[ibrx_2023-09-20T09-41-38.028]	700001	61223 PLA PARP1 HIF1A _br_Hyp AZ Position016 Image 70_[ims1_2023-09-20T09-41-38.028].ims	/Users/mzglab_user/Desktop/esv/pla hif1a parp1 2023/imaris/hypoxia/az3146/61223 PLA PARP1 HIF1A _br_Hyp AZ Position016 Image 70_[ims1_2023-09-20T09-41-38.028].ims
14400		2	Image 1	127	AZ DAPI.icsx_[ibrx_2023-09-20T09-41-38.028]	700001	9	AZ DAPI.icsx_[ibrx_2023-09-20T09-41-38.028]	700001	61223 PLA PARP1 HIF1A _br_Hyp AZ Position016 Image 70_[ims1_2023-09-20T09-41-38.028].ims	/Users/mzglab_user/Desktop/esv/pla hif1a parp1 2023/imaris/hypoxia/az3146/61223 PLA PARP1 HIF1A _br_Hyp AZ Position016 Image 70_[ims1_2023-09-20T09-41-38.028].ims
1910000		2	Image 1	128	AZ DAPI.icsx_[ibrx_2023-09-20T09-41-38.028]	700001	0	AZ DAPI.icsx_[ibrx_2023-09-20T09-41-38.028]	700001	61223 PLA PARP1 HIF1A _bs_Hyp AZ Position017 Image 71_[ims1_2023-09-20T09-41-38.028].ims	/Users/mzglab_user/Desktop/esv/pla hif1a parp1 2023/imaris/hypoxia/az3146/61223 PLA PARP1 HIF1A _bs_Hyp AZ Position017 Image 71_[ims1_2023-09-20T09-41-38.028].ims
1650000		2	Image 1	129	AZ DAPI.icsx_[ibrx_2023-09-20T09-41-38.028]	700001	1	AZ DAPI.icsx_[ibrx_2023-09-20T09-41-38.028]	700001	61223 PLA PARP1 HIF1A _bs_Hyp AZ Position017 Image 71_[ims1_2023-09-20T09-41-38.028].ims	/Users/mzglab_user/Desktop/esv/pla hif1a parp1 2023/imaris/hypoxia/az3146/61223 PLA PARP1 HIF1A _bs_Hyp AZ Position017 Image 71_[ims1_2023-09-20T09-41-38.028].ims
1760000		2	Image 1	130	AZ DAPI.icsx_[ibrx_2023-09-20T09-41-38.028]	700001	3	AZ DAPI.icsx_[ibrx_2023-09-20T09-41-38.028]	700001	61223 PLA PARP1 HIF1A _bs_Hyp AZ Position017 Image 71_[ims1_2023-09-20T09-41-38.028].ims	/Users/mzglab_user/Desktop/esv/pla hif1a parp1 2023/imaris/hypoxia/az3146/61223 PLA PARP1 HIF1A _bs_Hyp AZ Position017 Image 71_[ims1_2023-09-20T09-41-38.028].ims
1320000		2	Image 1	131	AZ DAPI.icsx_[ibrx_2023-09-20T09-41-38.028]	700001	4	AZ DAPI.icsx_[ibrx_2023-09-20T09-41-38.028]	700001	61223 PLA PARP1 HIF1A _bs_Hyp AZ Position017 Image 71_[ims1_2023-09-20T09-41-38.028].ims	/Users/mzglab_user/Desktop/esv/pla hif1a parp1 2023/imaris/hypoxia/az3146/61223 PLA PARP1 HIF1A _bs_Hyp AZ Position017 Image 71_[ims1_2023-09-20T09-41-38.028].ims
967000		2	Image 1	132	AZ DAPI.icsx_[ibrx_2023-09-20T09-41-38.028]	700001	5	AZ DAPI.icsx_[ibrx_2023-09-20T09-41-38.028]	700001	61223 PLA PARP1 HIF1A _bs_Hyp AZ Position017 Image 71_[ims1_2023-09-20T09-41-38.028].ims	/Users/mzglab_user/Desktop/esv/pla hif1a parp1 2023/imaris/hypoxia/az3146/61223 PLA PARP1 HIF1A _bs_Hyp AZ Position017 Image 71_[ims1_2023-09-20T09-41-38.028].ims
1600000		2	Image 1	133	AZ DAPI.icsx_[ibrx_2023-09-20T09-41-38.028]	700001	6	AZ DAPI.icsx_[ibrx_2023-09-20T09-41-38.028]	700001	61223 PLA PARP1 HIF1A _bs_Hyp AZ Position017 Image 71_[ims1_2023-09-20T09-41-38.028].ims	/Users/mzglab_user/Desktop/esv/pla hif1a parp1 2023/imaris/hypoxia/az3146/61223 PLA PARP1 HIF1A _bs_Hyp AZ Position017 Image 71_[ims1_2023-09-20T09-41-38.028].ims
915000		2	Image 1	134	AZ DAPI.icsx_[ibrx_2023-09-20T09-41-38.028]	700001	7	AZ DAPI.icsx_[ibrx_2023-09-20T09-41-38.028]	700001	61223 PLA PARP1 HIF1A _bs_Hyp AZ Position017 Image 71_[ims1_2023-09-20T09-41-38.028].ims	/Users/mzglab_user/Desktop/esv/pla hif1a parp1 2023/imaris/hypoxia/az3146/61223 PLA PARP1 HIF1A _bs_Hyp AZ Position017 Image 71_[ims1_2023-09-20T09-41-38.028].ims
1050000		2	Image 1	135	AZ DAPI.icsx_[ibrx_2023-09-20T09-41-38.028]	700001	8	AZ DAPI.icsx_[ibrx_2023-09-20T09-41-38.028]	700001	61223 PLA PARP1 HIF1A _bs_Hyp AZ Position017 Image 71_[ims1_2023-09-20T09-41-38.028].ims	/Users/mzglab_user/Desktop/esv/pla hif1a parp1 2023/imaris/hypoxia/az3146/61223 PLA PARP1 HIF1A _bs_Hyp AZ Position017 Image 71_[ims1_2023-09-20T09-41-38.028].ims
3530000		2	Image 1	136	AZ DAPI.icsx_[ibrx_2023-09-20T09-41-38.028]	700001	1	AZ DAPI.icsx_[ibrx_2023-09-20T09-41-38.028]	700001	61223 PLA PARP1 HIF1A _bt_Hyp AZ Position018 Image 72_[ims1_2023-09-20T09-41-38.028].ims	/Users/mzglab_user/Desktop/esv/pla hif1a parp1 2023/imaris/hypoxia/az3146/61223 PLA PARP1 HIF1A _bt_Hyp AZ Position018 Image 72_[ims1_2023-09-20T09-41-38.028].ims
6980000		2	Image 1	137	AZ DAPI.icsx_[ibrx_2023-09-20T09-41-38.028]	700001	2	AZ DAPI.icsx_[ibrx_2023-09-20T09-41-38.028]	700001	61223 PLA PARP1 HIF1A _bt_Hyp AZ Position018 Image 72_[ims1_2023-09-20T09-41-38.028].ims	/Users/mzglab_user/Desktop/esv/pla hif1a parp1 2023/imaris/hypoxia/az3146/61223 PLA PARP1 HIF1A _bt_Hyp AZ Position018 Image 72_[ims1_2023-09-20T09-41-38.028].ims
3580000		2	Image 1	138	AZ DAPI.icsx_[ibrx_2023-09-20T09-41-38.028]	700001	3	AZ DAPI.icsx_[ibrx_2023-09-20T09-41-38.028]	700001	61223 PLA PARP1 HIF1A _bt_Hyp AZ Position018 Image 72_[ims1_2023-09-20T09-41-38.028].ims	/Users/mzglab_user/Desktop/esv/pla hif1a parp1 2023/imaris/hypoxia/az3146/61223 PLA PARP1 HIF1A _bt_Hyp AZ Position018 Image 72_[ims1_2023-09-20T09-41-38.028].ims
3800000		2	Image 1	139	AZ DAPI.icsx_[ibrx_2023-09-20T09-41-38.028]	700001	5	AZ DAPI.icsx_[ibrx_2023-09-20T09-41-38.028]	700001	61223 PLA PARP1 HIF1A _bt_Hyp AZ Position018 Image 72_[ims1_2023-09-20T09-41-38.028].ims	/Users/mzglab_user/Desktop/esv/pla hif1a parp1 2023/imaris/hypoxia/az3146/61223 PLA PARP1 HIF1A _bt_Hyp AZ Position018 Image 72_[ims1_2023-09-20T09-41-38.028].ims
2930000		2	Image 1	140	AZ DAPI.icsx_[ibrx_2023-09-20T09-41-38.028]	700001	6	AZ DAPI.icsx_[ibrx_2023-09-20T09-41-38.028]	700001	61223 PLA PARP1 HIF1A _bt_Hyp AZ Position018 Image 72_[ims1_2023-09-20T09-41-38.028].ims	/Users/mzglab_user/Desktop/esv/pla hif1a parp1 2023/imaris/hypoxia/az3146/61223 PLA PARP1 HIF1A _bt_Hyp AZ Position018 Image 72_[ims1_2023-09-20T09-41-38.028].ims
5210000		2	Image 1	141	AZ DAPI.icsx_[ibrx_2023-09-20T09-41-38.028]	700001	7	AZ DAPI.icsx_[ibrx_2023-09-20T09-41-38.028]	700001	61223 PLA PARP1 HIF1A _bt_Hyp AZ Position018 Image 72_[ims1_2023-09-20T09-41-38.028].ims	/Users/mzglab_user/Desktop/esv/pla hif1a parp1 2023/imaris/hypoxia/az3146/61223 PLA PARP1 HIF1A _bt_Hyp AZ Position018 Image 72_[ims1_2023-09-20T09-41-38.028].ims
4190000		2	Image 1	142	AZ DAPI.icsx_[ibrx_2023-09-20T09-41-38.028]	700001	8	AZ DAPI.icsx_[ibrx_2023-09-20T09-41-38.028]	700001	61223 PLA PARP1 HIF1A _bt_Hyp AZ Position018 Image 72_[ims1_2023-09-20T09-41-38.028].ims	/Users/mzglab_user/Desktop/esv/pla hif1a parp1 2023/imaris/hypoxia/az3146/61223 PLA PARP1 HIF1A _bt_Hyp AZ Position018 Image 72_[ims1_2023-09-20T09-41-38.028].ims
8950000		2	Image 1	143	AZ DAPI.icsx_[ibrx_2023-09-20T09-41-38.028]	700001	9	AZ DAPI.icsx_[ibrx_2023-09-20T09-41-38.028]	700001	61223 PLA PARP1 HIF1A _bt_Hyp AZ Position018 Image 72_[ims1_2023-09-20T09-41-38.028].ims	/Users/mzglab_user/Desktop/esv/pla hif1a parp1 2023/imaris/hypoxia/az3146/61223 PLA PARP1 HIF1A _bt_Hyp AZ Position018 Image 72_[ims1_2023-09-20T09-41-38.028].ims
3620000		2	Image 1	144	AZ DAPI.icsx_[ibrx_2023-09-20T09-41-38.028]	700001	0	AZ DAPI.icsx_[ibrx_2023-09-20T09-41-38.028]	700001	61223 PLA PARP1 HIF1A _bu_Hyp AZ Position019 Image 73_[ims1_2023-09-20T09-41-38.028].ims	/Users/mzglab_user/Desktop/esv/pla hif1a parp1 2023/imaris/hypoxia/az3146/61223 PLA PARP1 HIF1A _bu_Hyp AZ Position019 Image 73_[ims1_2023-09-20T09-41-38.028].ims
1820000		2	Image 1	145	AZ DAPI.icsx_[ibrx_2023-09-20T09-41-38.028]	700001	1	AZ DAPI.icsx_[ibrx_2023-09-20T09-41-38.028]	700001	61223 PLA PARP1 HIF1A _bu_Hyp AZ Position019 Image 73_[ims1_2023-09-20T09-41-38.028].ims	/Users/mzglab_user/Desktop/esv/pla hif1a parp1 2023/imaris/hypoxia/az3146/61223 PLA PARP1 HIF1A _bu_Hyp AZ Position019 Image 73_[ims1_2023-09-20T09-41-38.028].ims
2270000		2	Image 1	146	AZ DAPI.icsx_[ibrx_2023-09-20T09-41-38.028]	700001	2	AZ DAPI.icsx_[ibrx_2023-09-20T09-41-38.028]	700001	61223 PLA PARP1 HIF1A _bu_Hyp AZ Position019 Image 73_[ims1_2023-09-20T09-41-38.028].ims	/Users/mzglab_user/Desktop/esv/pla hif1a parp1 2023/imaris/hypoxia/az3146/61223 PLA PARP1 HIF1A _bu_Hyp AZ Position019 Image 73_[ims1_2023-09-20T09-41-38.028].ims
4410000		2	Image 1	147	AZ DAPI.icsx_[ibrx_2023-09-20T09-41-38.028]	700001	3	AZ DAPI.icsx_[ibrx_2023-09-20T09-41-38.028]	700001	61223 PLA PARP1 HIF1A _bu_Hyp AZ Position019 Image 73_[ims1_2023-09-20T09-41-38.028].ims	/Users/mzglab_user/Desktop/esv/pla hif1a parp1 2023/imaris/hypoxia/az3146/61223 PLA PARP1 HIF1A _bu_Hyp AZ Position019 Image 73_[ims1_2023-09-20T09-41-38.028].ims
4200000		2	Image 1	148	AZ DAPI.icsx_[ibrx_2023-09-20T09-41-38.028]	700001	4	AZ DAPI.icsx_[ibrx_2023-09-20T09-41-38.028]	700001	61223 PLA PARP1 HIF1A _bu_Hyp AZ Position019 Image 73_[ims1_2023-09-20T09-41-38.028].ims	/Users/mzglab_user/Desktop/esv/pla hif1a parp1 2023/imaris/hypoxia/az3146/61223 PLA PARP1 HIF1A _bu_Hyp AZ Position019 Image 73_[ims1_2023-09-20T09-41-38.028].ims
1220000		2	Image 1	149	AZ DAPI.icsx_[ibrx_2023-09-20T09-41-38.028]	700001	6	AZ DAPI.icsx_[ibrx_2023-09-20T09-41-38.028]	700001	61223 PLA PARP1 HIF1A _bu_Hyp AZ Position019 Image 73_[ims1_2023-09-20T09-41-38.028].ims	/Users/mzglab_user/Desktop/esv/pla hif1a parp1 2023/imaris/hypoxia/az3146/61223 PLA PARP1 HIF1A _bu_Hyp AZ Position019 Image 73_[ims1_2023-09-20T09-41-38.028].ims
1680000		2	Image 1	150	AZ DAPI.icsx_[ibrx_2023-09-20T09-41-38.028]	700001	7	AZ DAPI.icsx_[ibrx_2023-09-20T09-41-38.028]	700001	61223 PLA PARP1 HIF1A _bu_Hyp AZ Position019 Image 73_[ims1_2023-09-20T09-41-38.028].ims	/Users/mzglab_user/Desktop/esv/pla hif1a parp1 2023/imaris/hypoxia/az3146/61223 PLA PARP1 HIF1A _bu_Hyp AZ Position019 Image 73_[ims1_2023-09-20T09-41-38.028].ims
2910000		2	Image 1	151	AZ DAPI.icsx_[ibrx_2023-09-20T09-41-38.028]	700001	8	AZ DAPI.icsx_[ibrx_2023-09-20T09-41-38.028]	700001	61223 PLA PARP1 HIF1A _bu_Hyp AZ Position019 Image 73_[ims1_2023-09-20T09-41-38.028].ims	/Users/mzglab_user/Desktop/esv/pla hif1a parp1 2023/imaris/hypoxia/az3146/61223 PLA PARP1 HIF1A _bu_Hyp AZ Position019 Image 73_[ims1_2023-09-20T09-41-38.028].ims
