# Supplementary material for: HIF1A-mediated pathways promote euploid cell survival in chromosomally mosaic embryos
Source: eLife. 2025 Oct 14;13:RP101912. doi: 10.7554/eLife.101912 (PMC12520657; doi:10.7554/eLife.101912)
Supplement: Figure 4—source data 1. [file elife-101912-fig4-data1.xlsx]

## Sheet: chimeras lineage 
		DMSO/AZ	# sox17	#sox17 total	sox17 proportion	#cdx2	#cdx2 total	cdx2 proportion	#Nanog	#nanog total	nanog proportion	#dapi	# dapi total	total proportion	Treatment	extrusion			Reversine/AZ	# sox17	#sox17 total	sox17 proportion	#cdx2	#cdx2 total	cdx2 proportion	#Nanog	#nanog total	nanog proportion	#dapi	# dapi total	total proportion	Treatment	extrusion
	mtmg (DMSO)/ E-cad (AZ)	a	6	7	85.7143	24	48	50	3	6	50	32	60	53.3333	DMSO	some amount of cell debri but 0 cells without marker		mtmg (reversine)/ E-cad (AZ)	a	6	10	60	37	75	49.3333	2	13	15.3846	42	93	45.1613	Reversine
			1		14.2857	24		50	3		50	28		46.6667	AZ3146					4		40	38		50.6667	11		84.6154	51		54.8387	AZ3146	a lot of cell debris (3 cells withouth marker excluded from analysis 3 mtmg )
		b	5	7	71.4286	20	58	34.4828	4	7	57.1429	34	76	44.7368	DMSO				b	6	10	60	29	46	63.0435	1	9	11.1111	30	60	50	Reversine	1
			2		28.5714	38		65.5172	3		42.8571	42		55.2632	AZ3146					4		40	17		36.9565	8		88.8889	30		50	AZ3146	1 e cad extrustion/ a lot of cell debris (5 cells withouth marker excluded from analysis, 5 mtmg)
	mtmg(DMSO)/ wt-Ecad (AZ)	c	6	10	60	35	58	60.3448	3	7	42.8571	40	80	50	DMSO				c	5	8	62.5	16	68	23.5294	2	11	18.1818	21	87	24.1379	Reversine	1
			4		40	23		39.6552	4		57.1429	40		50	AZ3146					3		37.5	52		76.4706	9		81.8182	66		75.8621	AZ3146	a lot of cell debris (4 cells withouth marker excluded from analysis 3 mtmg 1 cadherin)
		d	9	13	69.2308	54	76	71.0526	5	10	50	58	99	58.5859	DMSO				d	7	9	77.7778	15	50	30	0	11	0	21	72	29.1667	Reversine
			4		30.7692	22		28.9474	5		50	41		41.4141	AZ3146	some amount cell debris (1cell withouth marker excluded from analysis 1 AZ )				2		22.2222	35		70	11		100	51		70.8333	AZ3146	a lot of cell debris (3 cells withouth marker excluded from analysis 1 mtmg 2 cadherin)
		e	6	9	66.6667	46	76	60.5263	5	7	71.4286	54	101	53.4653	DMSO				e	4	8	50	5	39	12.8205	2	7	28.5714	14	55	25.4545	Reversine	1
			3		33.3333	30		39.4737	2		28.5714	47		46.5347	AZ3146	some amount cell debris (1cell withouth marker excluded from analysis 1 AZ )				4		50	34		87.1795	5		71.4286	41		74.5455	AZ3146	a lot of cell debris (5cells withouth marker excluded from analysis 5 mtmg )
		f	3	6	50	37	63	58.7302	4	7	57.1429	43	77	55.8442	DMSO			mtmg(reversine)/ wt-Ecad (AZ)	f	3	7	42.8571	28	70	40	2	14	14.2857	32	92	34.7826	Reversine
			3		50	26		41.2698	3		42.8571	34		44.1558	AZ3146					4		57.1429	42		60	12		85.7143	60		65.2174	AZ3146	a lot of cell debris (1cell withouth marker excluded from analysis 1 mtmg )
		g	9	11	81.8182	25	67	37.3134	10	13	76.9231	39	94	41.4894	DMSO				g	6	8	75	24	68	35.2941	3	9	33.3333	28	86	32.5581	Reversine
			2		18.1818	42		62.6866	3		23.0769	55		58.5106	AZ3146	some amount cell debris (2 cells withouth marker excluded from analysis 2 AZ )				2		25	44		64.7059	6		66.6667	58		67.4419	AZ3146	a lot of cell debris (2 cells withouth marker excluded from analysis 1 mtmg )
		h	11	13	84.6154	25	61	40.9836	6	7	85.7143	34	80	42.5	DMSO				h	4	9	44.4444	30	55	54.5455	3	12	25	36	73	49.3151	Reversine
			2		15.3846	36		59.0164	1		14.2857	46		57.5	AZ3146	some amount cell debris (2 cells withouth marker excluded from analysis 2 AZ )				5		55.5556	25		45.4545	9		75	37		50.6849	AZ3146
		i	6	7	85.7143	32	62	51.6129	4	7	57.1429	41	77	53.2468	DMSO				i	5	7	71.4286	24	64	37.5	6	14	42.8571	29	88	32.9545	Reversine	a lot of cell debris (1cell withouth marker excluded from analysis 1 mtmg )
			1		14.2857	30		48.3871	3		42.8571	36		46.7532	AZ3146	some amount cell debris (2 cells withouth marker excluded from analysis 2 AZ )				2		28.5714	40		62.5	8		57.1429	59		67.0455	AZ3146
																			j	4	8	50	27	76	35.5263	4	9	44.4444	30	94	31.9149	Reversine	a lot of cell debris (1cell withouth marker excluded from analysis 1 mtmg )
																				4		50	49		64.4737	5		55.5556	64		68.0851	AZ3146

## Sheet: correlation
Normoxia				Hypoxia
DMSO/AZ		Rv/AZ		DMSO/AZ		Rv/AZ
TE	Epiblast	TE	Epiblast	TE	Epiblast	TE	Epiblast
50	50	50.6667	84.6154	49.0566	30.7692	46.1538	50
65.5172	42.8571	36.9565	88.8889	53.8462	37.5	51.1111	50
39.6552	57.1429	76.4706	81.8182	56.7568	33.3333	47.2727	45.4545
28.9474	50	70	100	31.8182	33.3333	48.0769	30
39.4737	28.5714	87.1795	71.4286	47.619	26.6667	61.5385	70.5882
41.2698	42.8571	60	85.7143	37.7049	58.3333	61.7021	46.6667
62.6866	23.0769	64.7059	66.6667	57.1429	33.3333	38.2979	41.6667
59.0164	14.2857	45.4545	75			61.3636	54.5455
48.3871	42.8571	62.5	57.1429			75.6098	100
		64.4737	55.5556			36.6197	38.4615
						62.6866	60
						52.2727	80
						59.6154	45.4545
						60	57.1429
